# Supplementary material for: Concise Total Synthesis of (+)-Zeylenone with Antitumor Activity and Structure-Activity Relationship of Its Derivatives
Source: Preprints.org preprint supplement (doi:10.20944/preprints201904.0262.v1), 2019-04-24
Supplement: Supplementary file 1 [file supplementary]

QA2-4 F\_190318103220 #1 RT: 0.01 AV: 1 NL: 6.54E7  
T: FTMS + c ESI Full ms [50.00-1000.00]

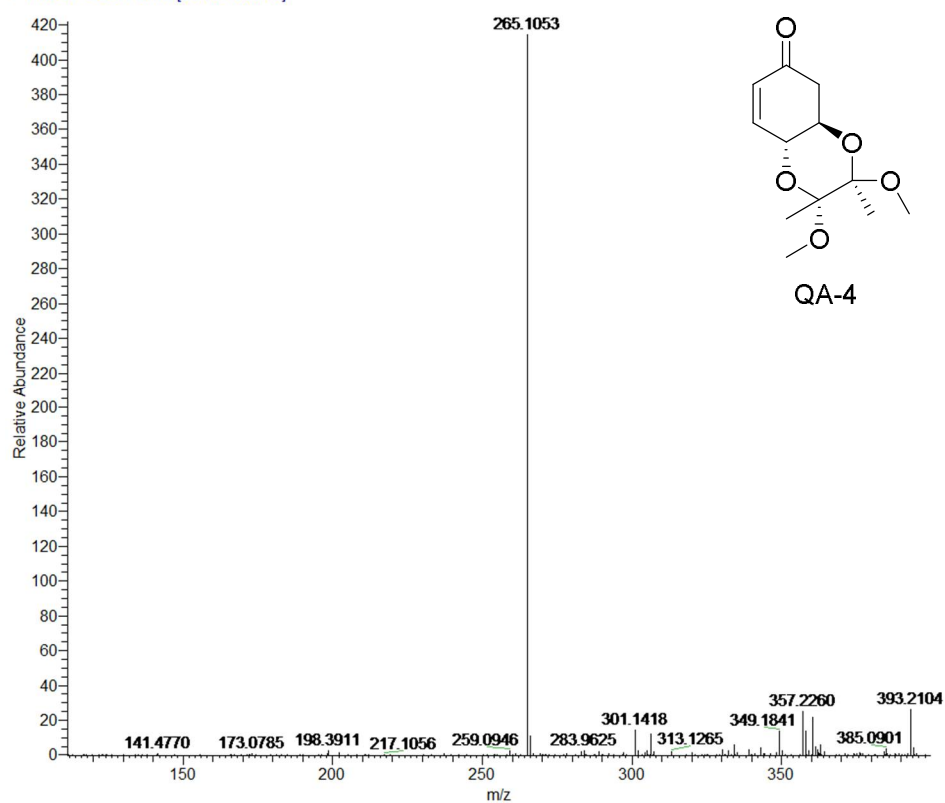

HRMS spectrum of compound QA-4

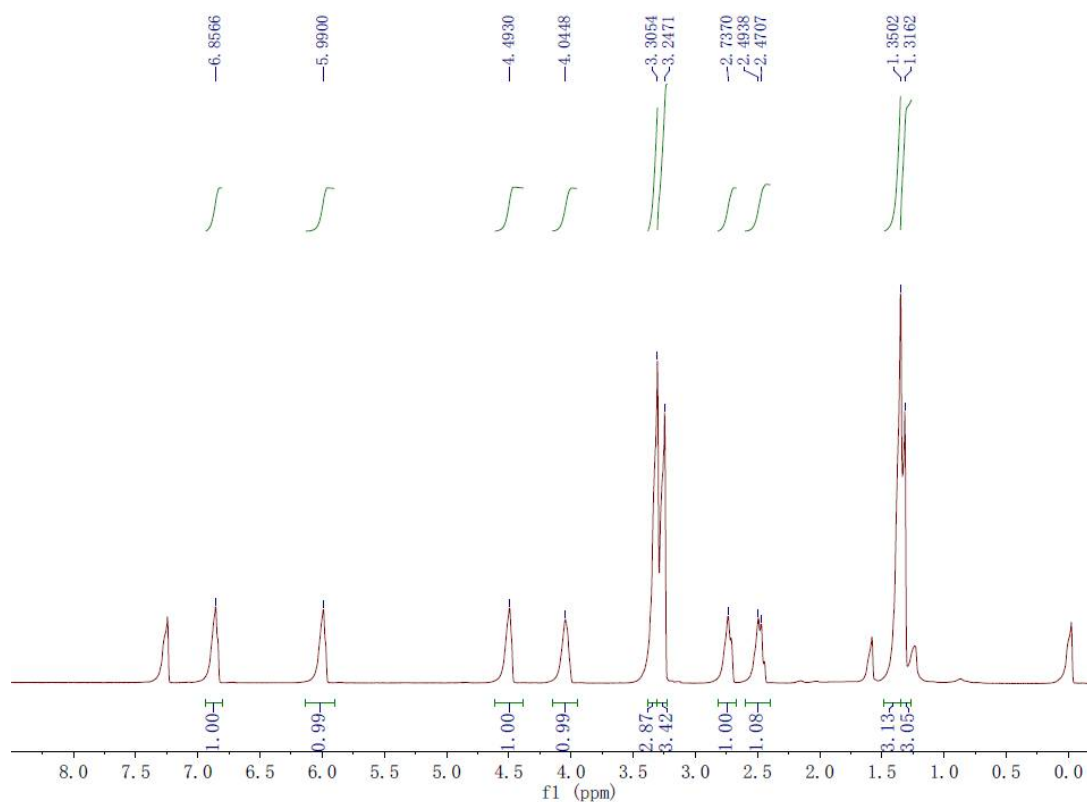

<sup>1</sup>H-NMR spectrum of compound QA-4

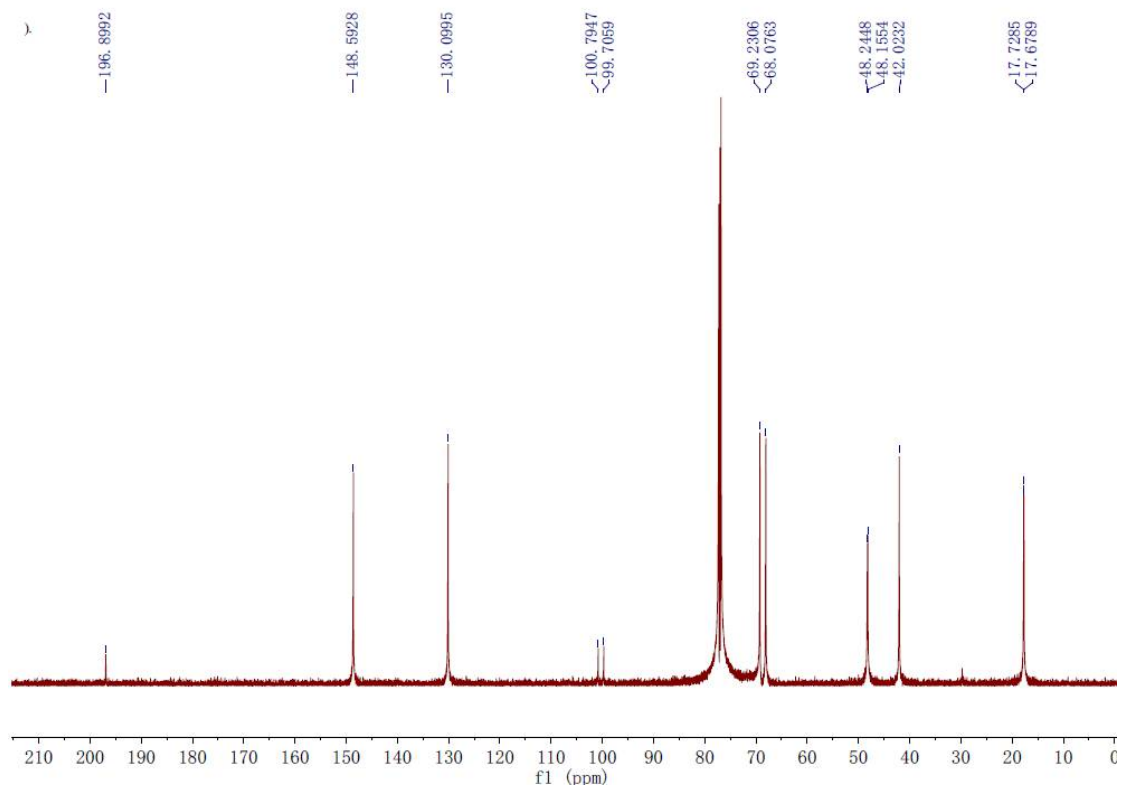

$^{13}\text{C}$ -NMR spectrum of compound QA-4

QA2-5 F\_190305132555 #1 RT: 0.00 AV: 1 NL: 3.89E8  
T: FTMS + c ESI Full ms [100.00-1500.00]

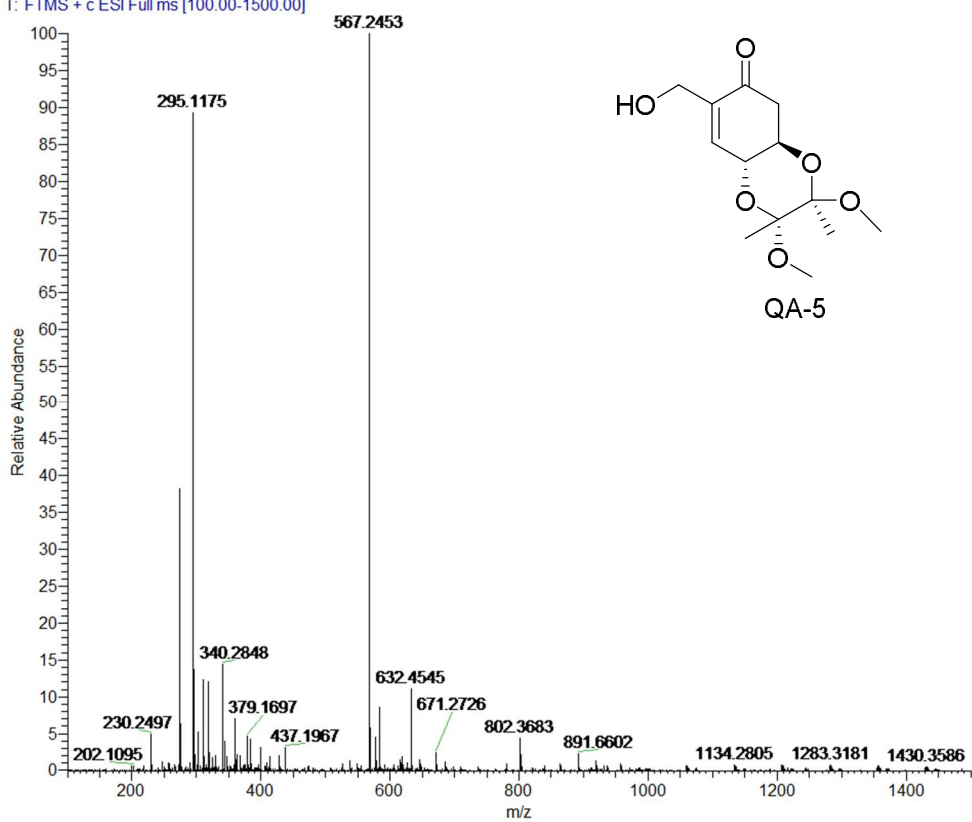

HRMS spectrum of compound QA-5

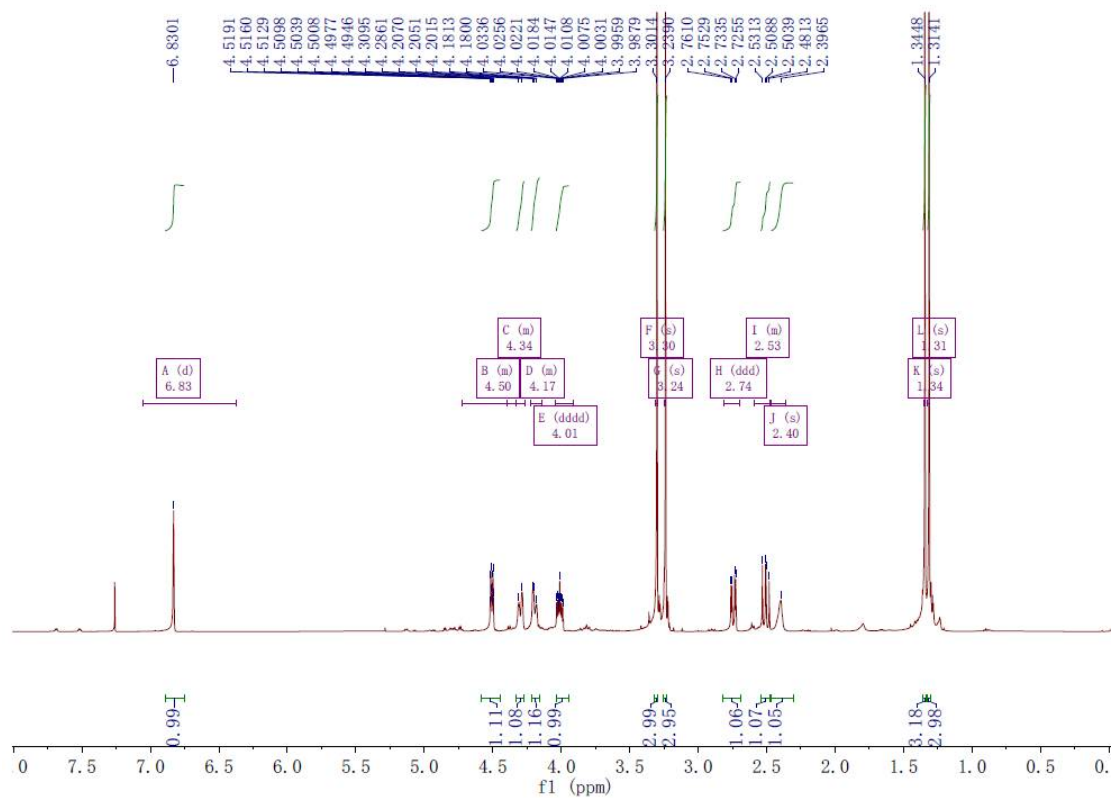

<sup>1</sup>H-NMR spectrum of compound QA-5

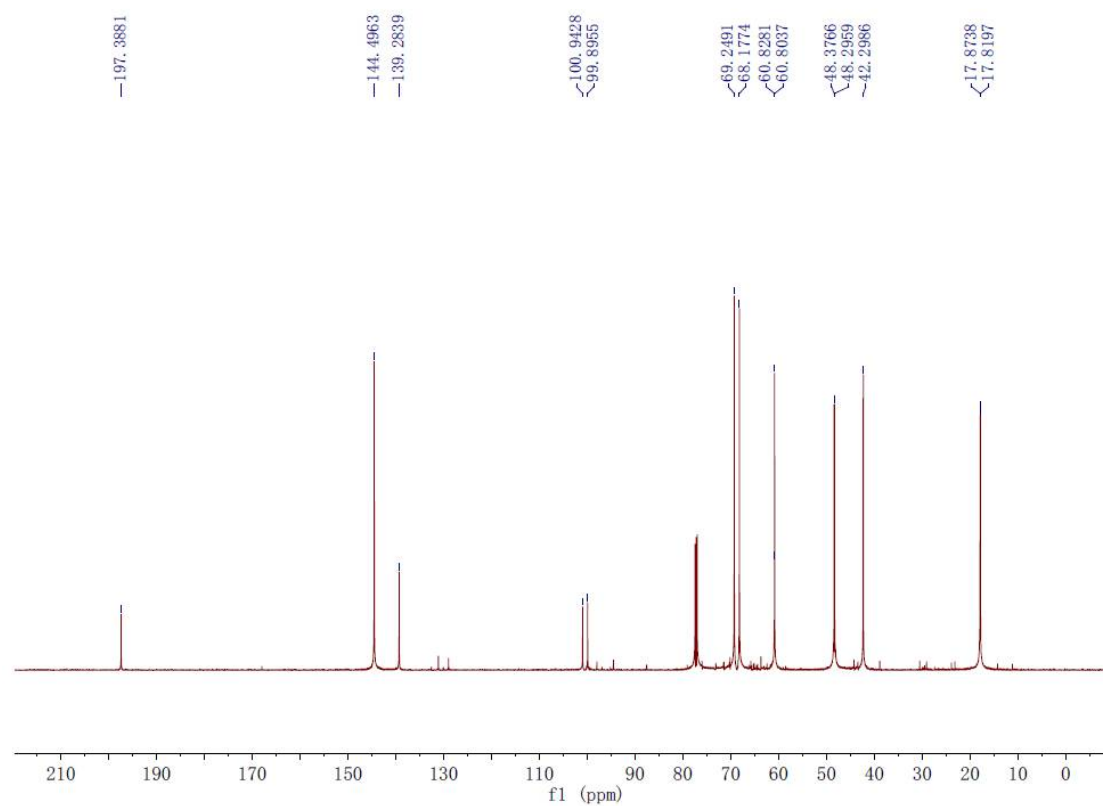

<sup>13</sup>C-NMR spectrum of compound QA-5

QA2-6\_F\_190305132555 #1 RT: 0.00 AV: 1 NL: 9.00E8  
T: FTMS + c ESI Full ms [100.00-1500.00]

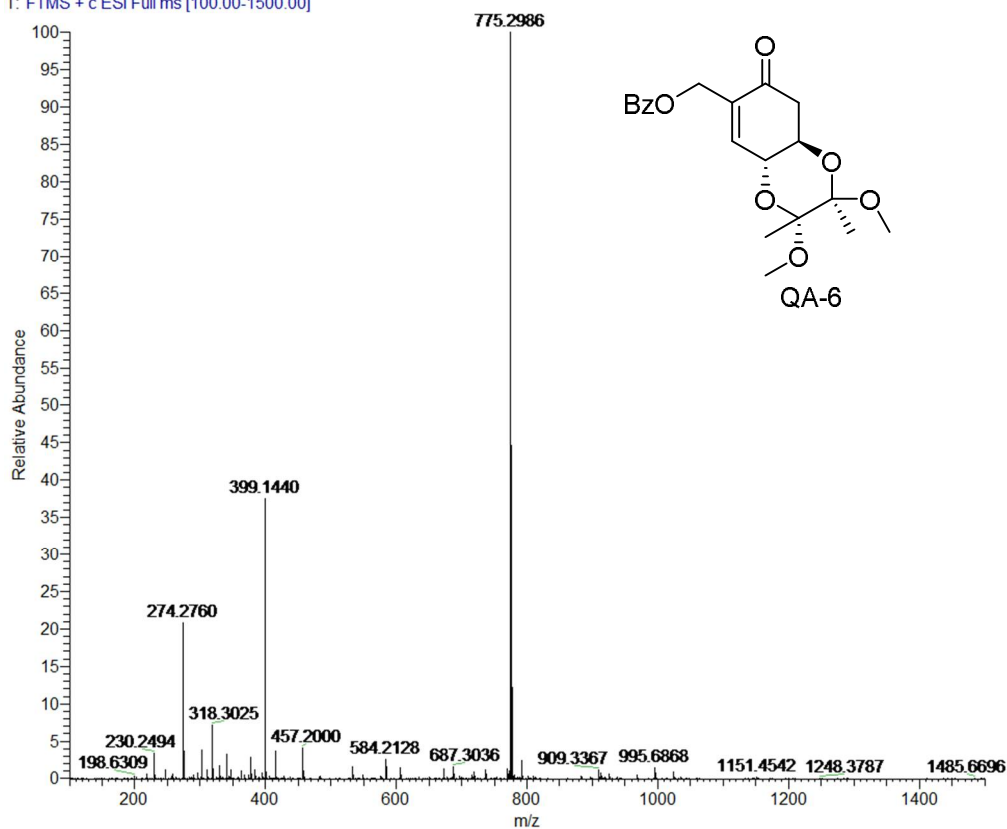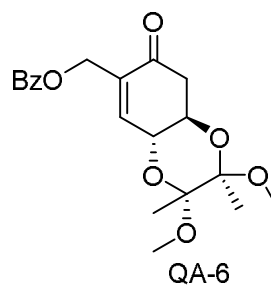

HRMS spectrum of compound QA-6

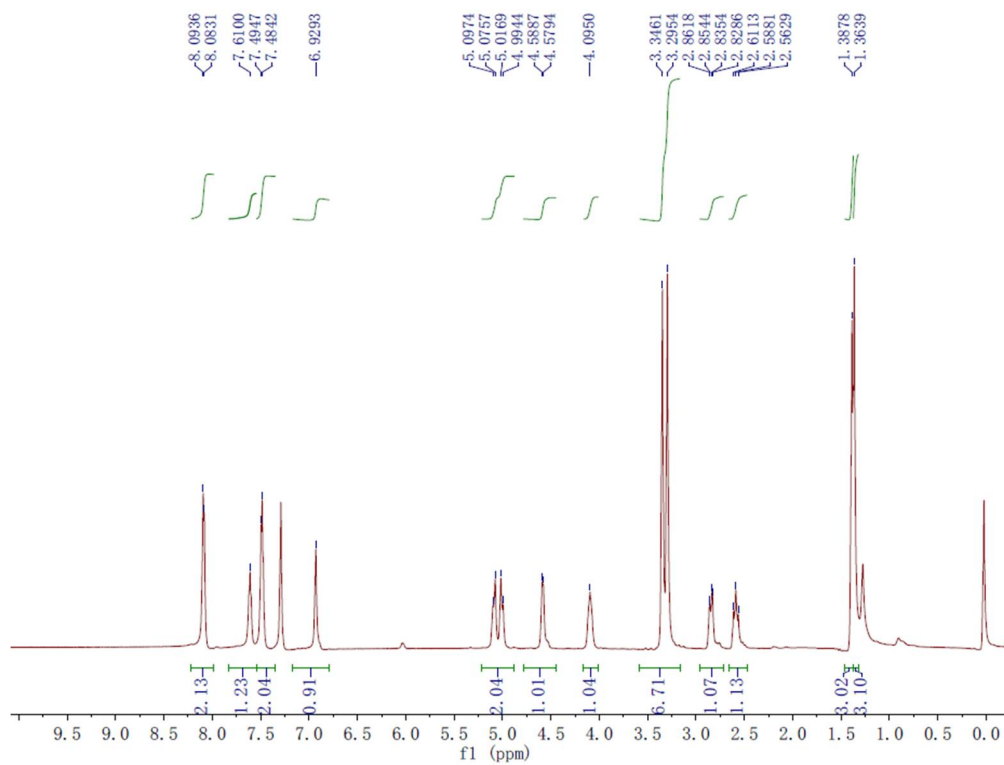

<sup>1</sup>H-NMR spectrum of compound QA-6

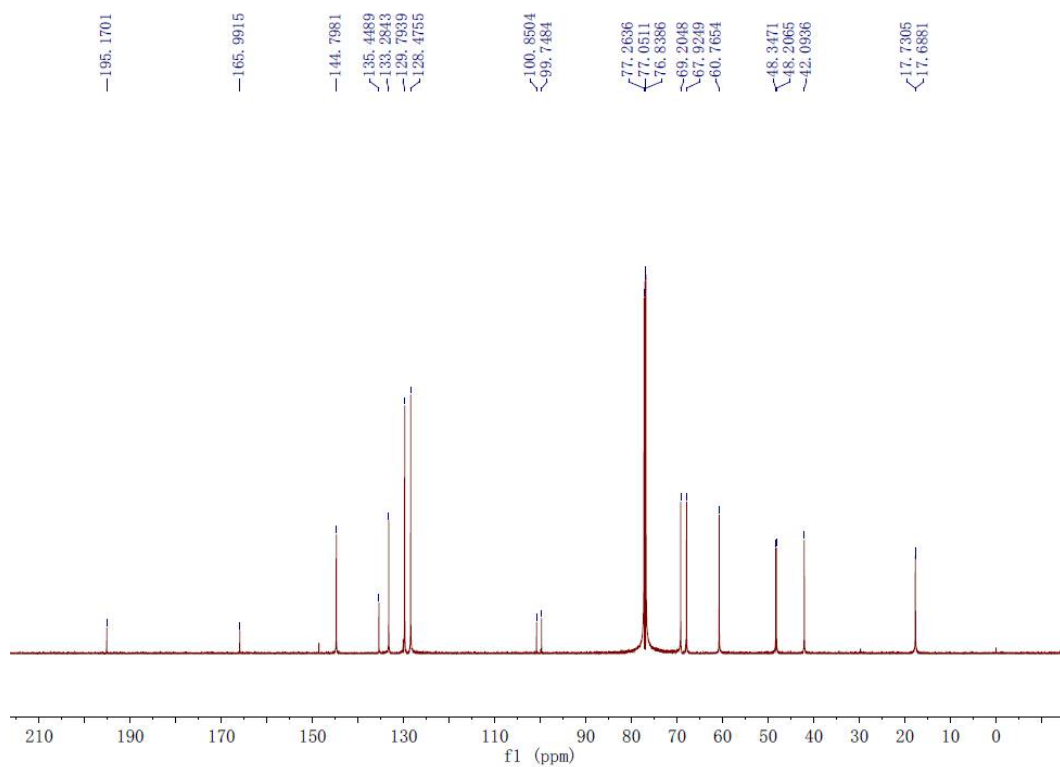

$^{13}\text{C}$ -NMR spectrum of compound QA-6

QA2-7\_F\_190305132555 #1 RT: 0.01 AV: 1 NL: 3.71E8  
T: FTMS + c ESI Full ms [100.00-1500.00]

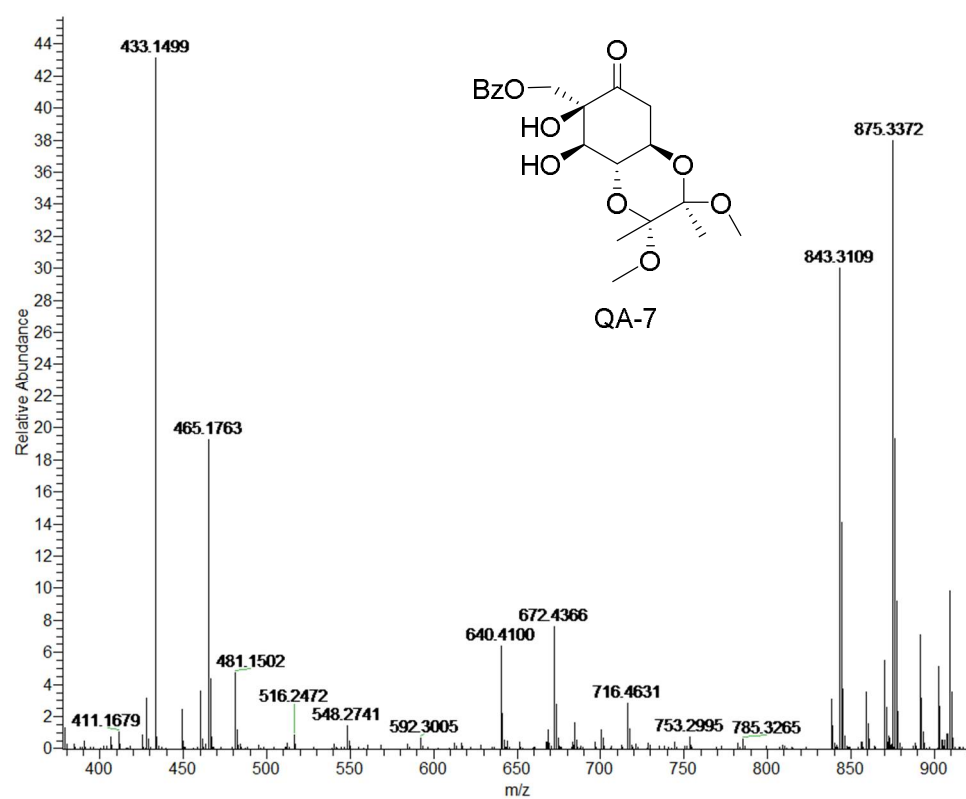

HRMS spectrum of compound QA-7

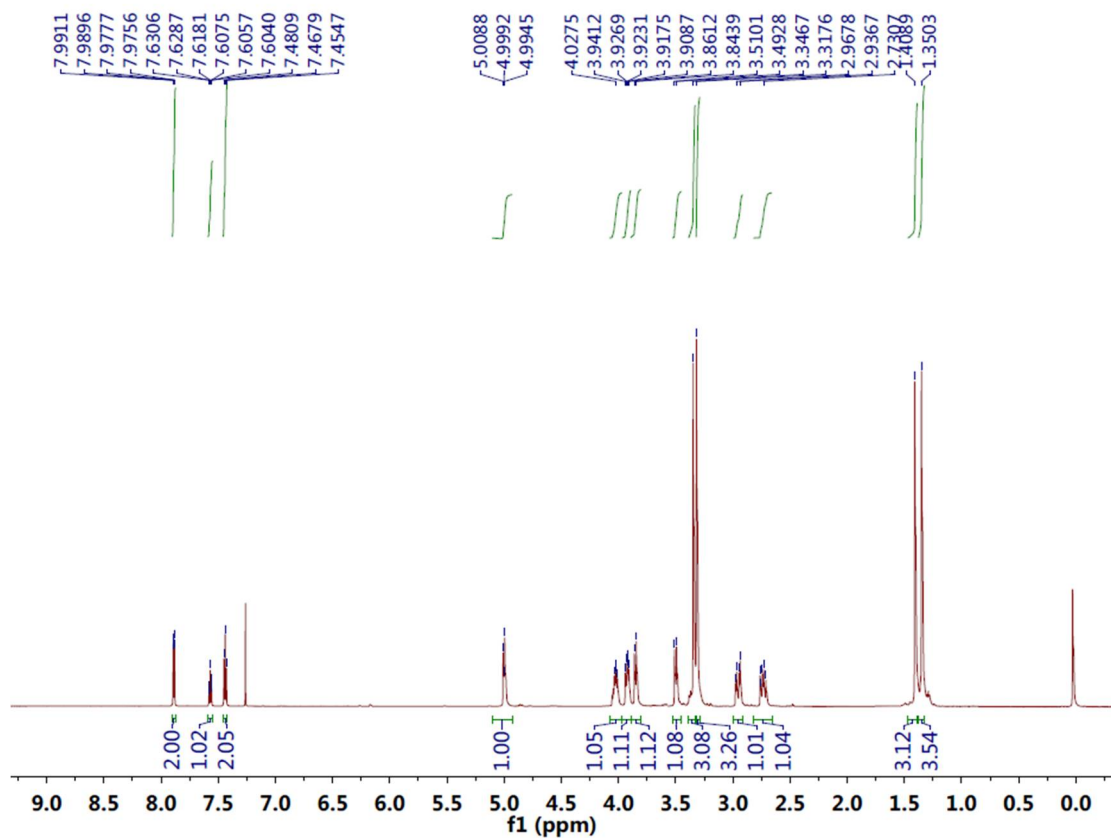

<sup>1</sup>H-NMR spectrum of compound QA-7

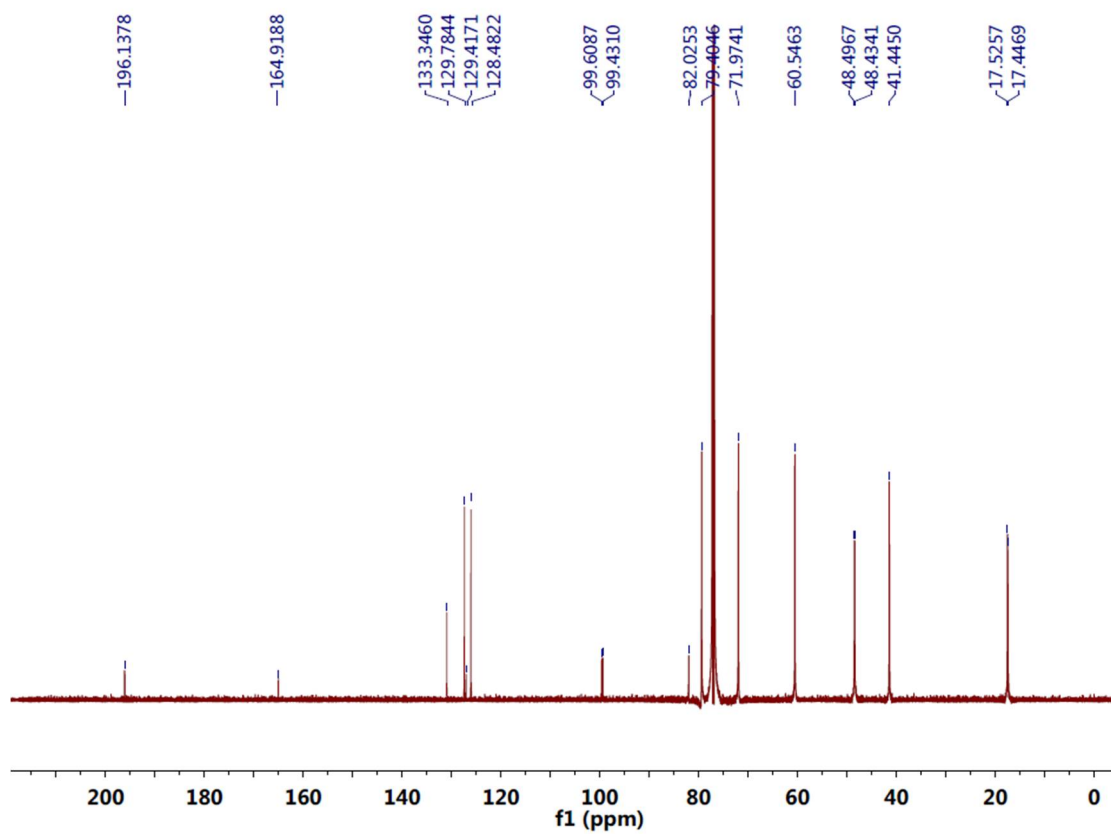

<sup>13</sup>C-NMR spectrum of compound QA-7

QA2-8 F\_190305132555 #1 RT: 0.00 AV: 1 NL: 4.90E7  
T: FTMS + c ESI Full ms [100.00-1500.00]

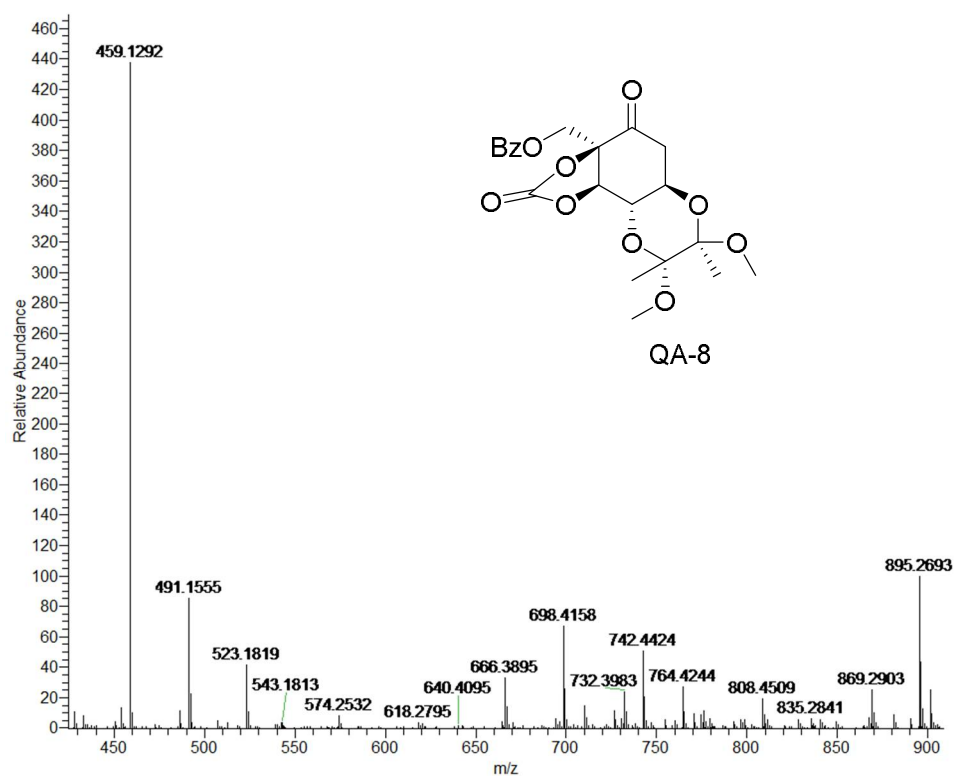

HRMS spectrum of compound QA-8

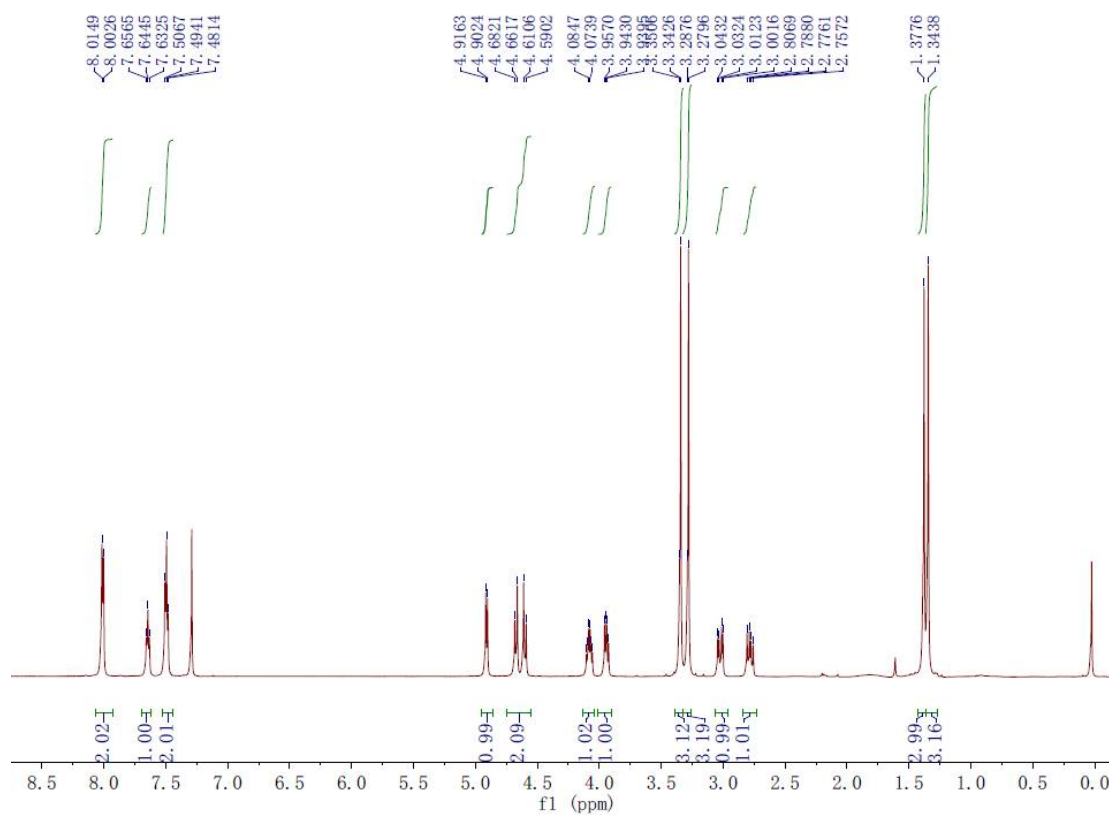

<sup>1</sup>H-NMR spectrum of compound QA-8

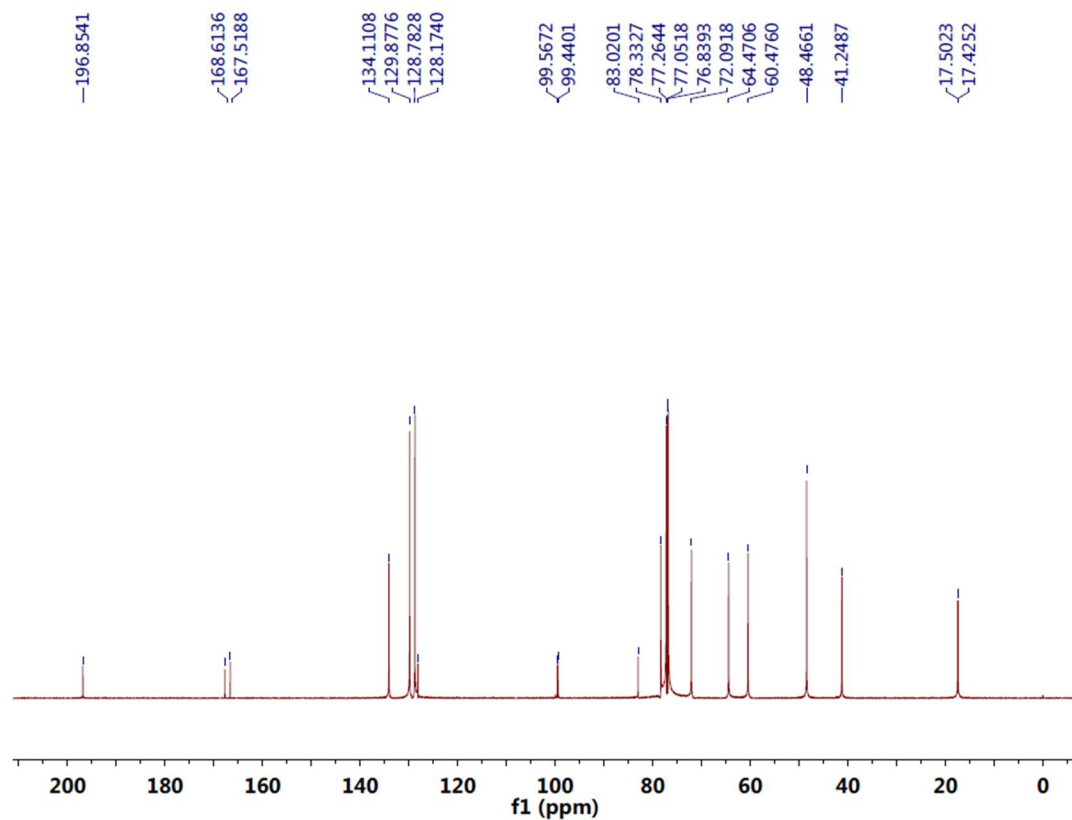

<sup>13</sup>CNMR spectrum of compound QA-8

0402-B F\_190402151640 #4 RT: 0.05 AV: 1 NL: 1.20E8  
T: FTMS + c ESI Full ms [50.00-1000.00]

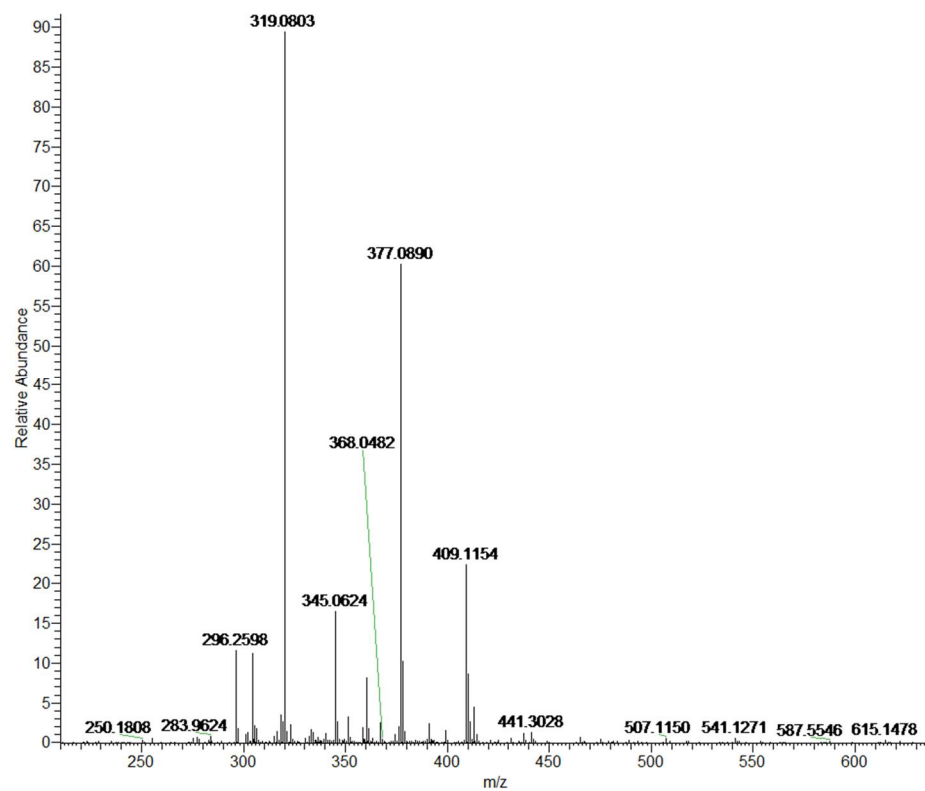

HRMS spectrum of compound QA-13



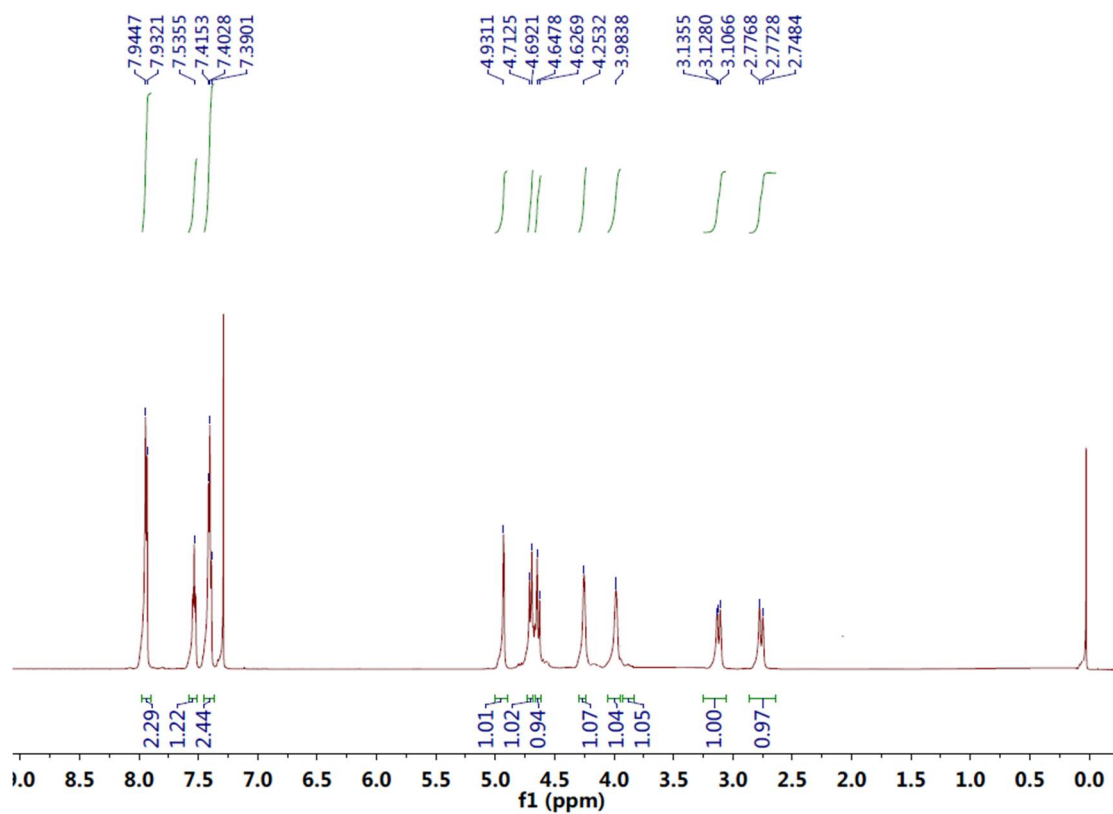

<sup>1</sup>H-NMR spectrum of compound QA-13

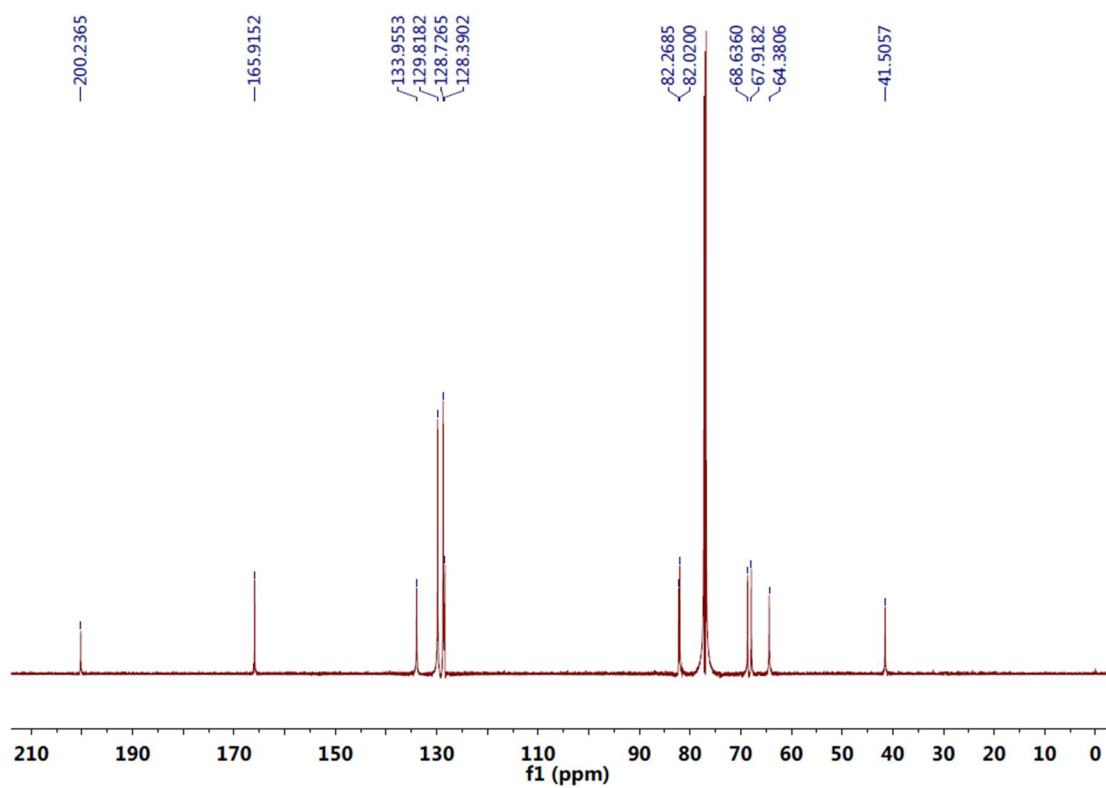

<sup>13</sup>C-NMR spectrum of compound QA-13

SA F\_190305132555 #1 RT: 0.01 AV: 1 NL: 1.46E8  
T: FTMS + c ESI Full ms [100.00-1500.00]

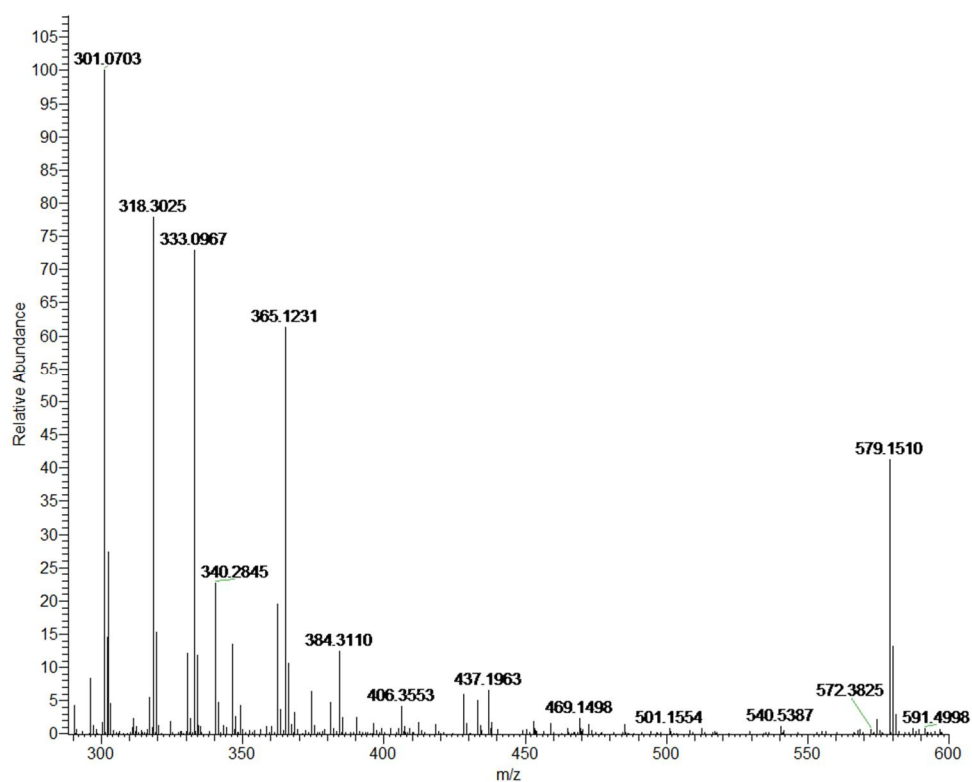

HRMS spectrum of compound QA-14

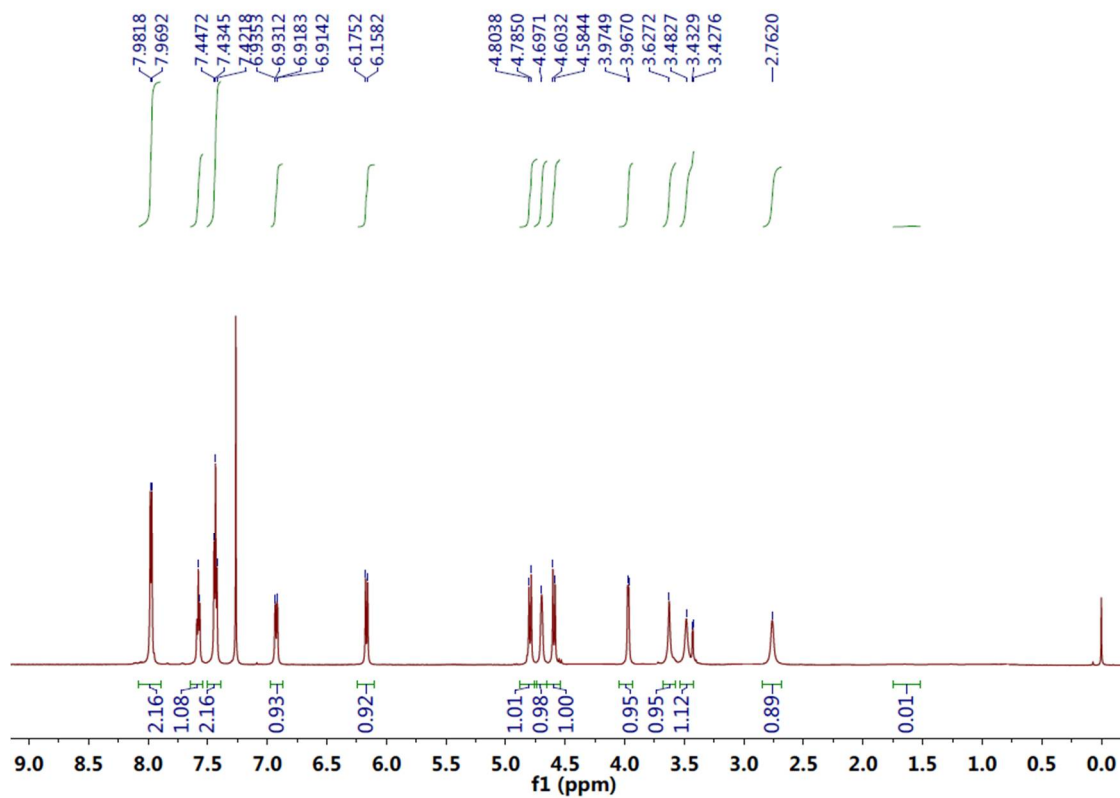

<sup>1</sup>H-NMR spectrum of compound QA-14

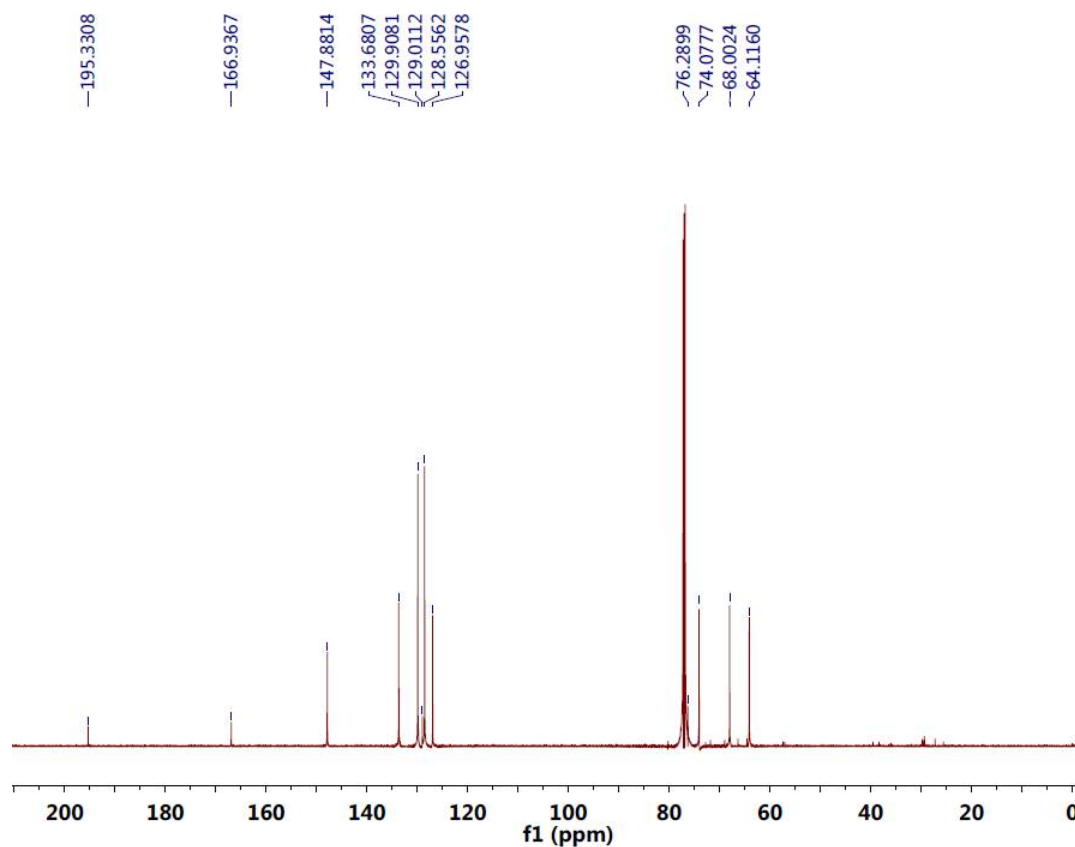

<sup>13</sup>C-NMR spectrum of compound QA-14

SA -1 F\_190305132555 #1 RT: 0.01 AV: 1 NL: 2.10E6  
T: FTMS + c ESI Full ms [100.00-1500.00]

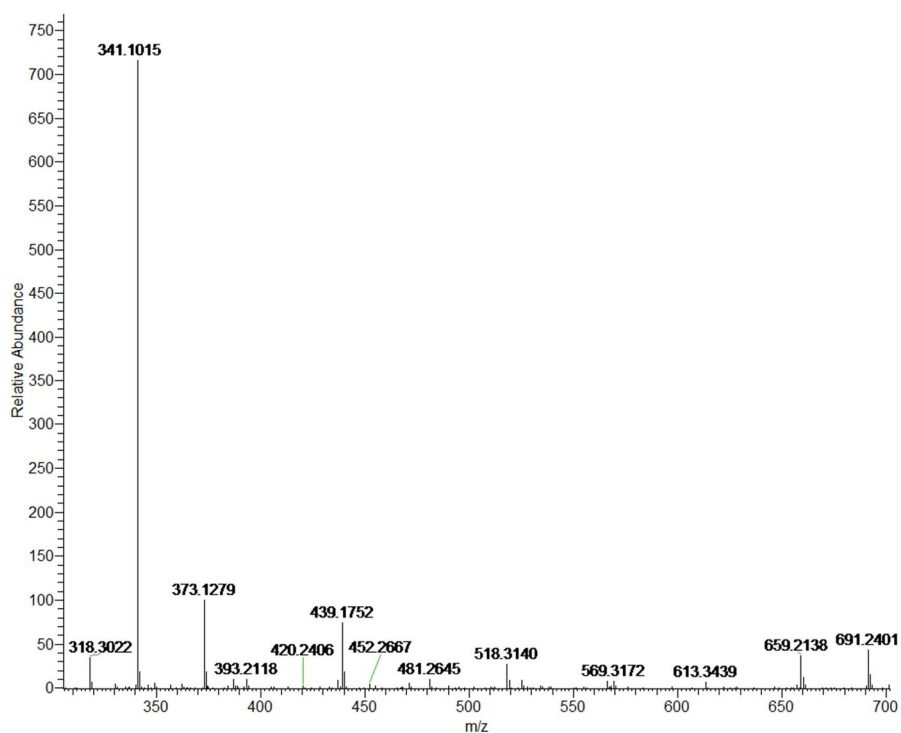

HRMS spectrum of compound QA-15

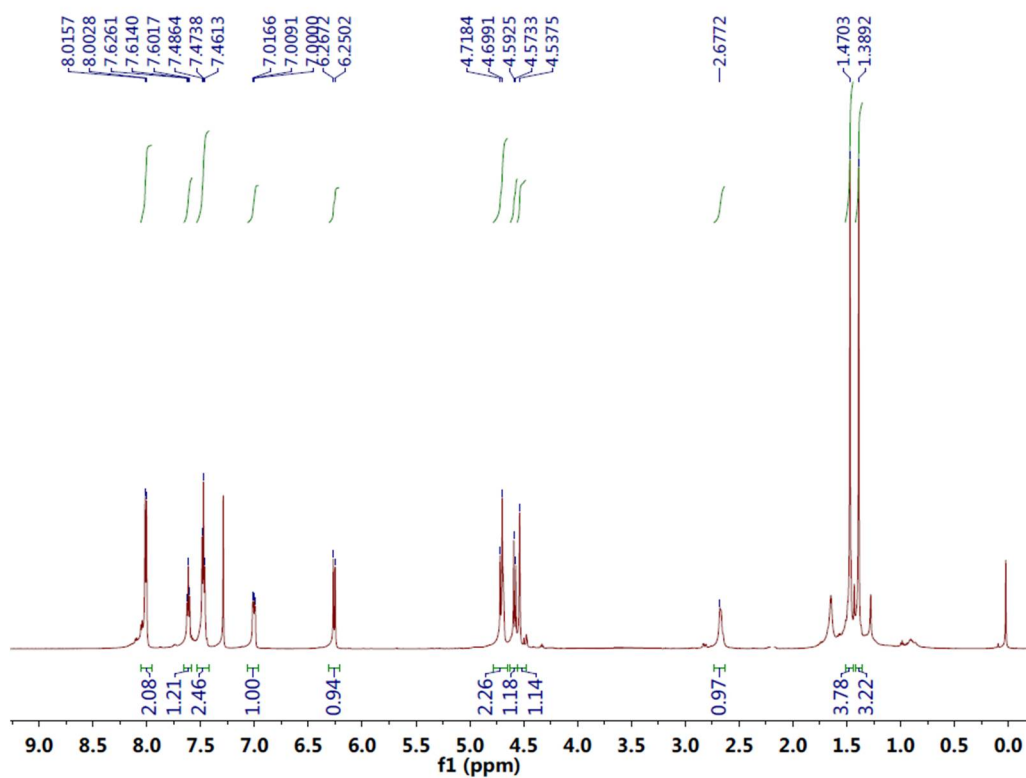

<sup>1</sup>H-NMR spectrum of compound QA-15

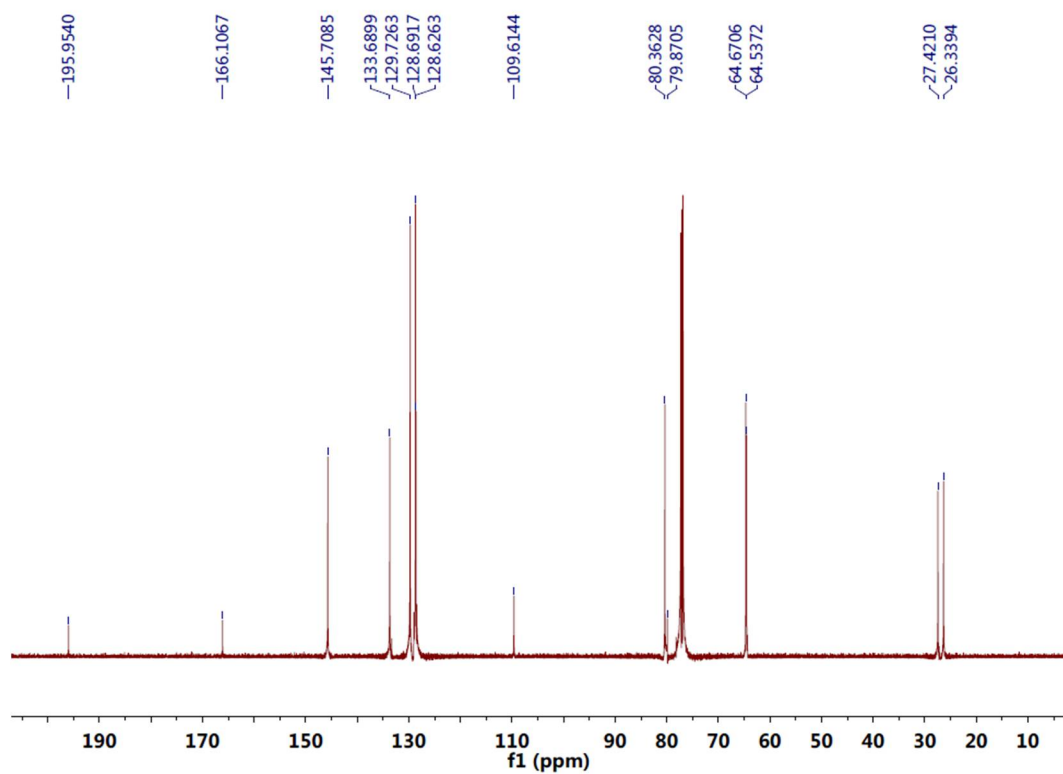

<sup>13</sup>C-NMR spectrum of compound QA-15

SB F\_190305132555 #1 RT: 0.01 AV: 1 NL: 4.05E8  
T: FTMS + c ESI Full ms [100.00-1500.00]

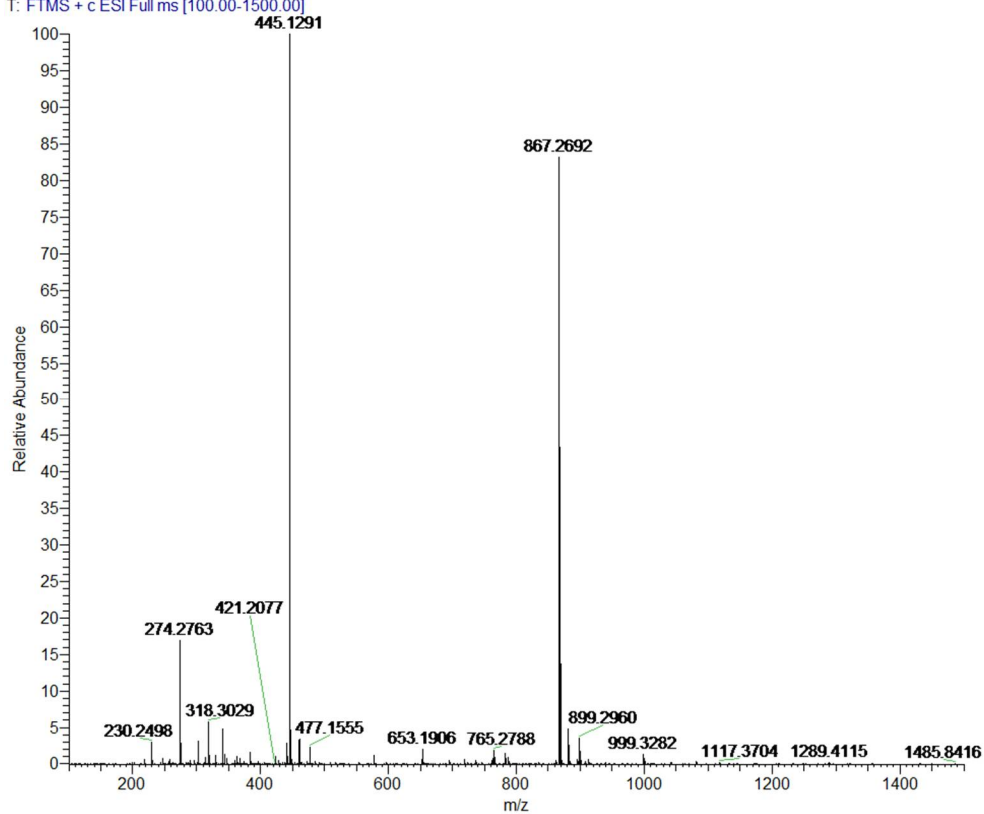

HRMS spectrum of compound QA-16

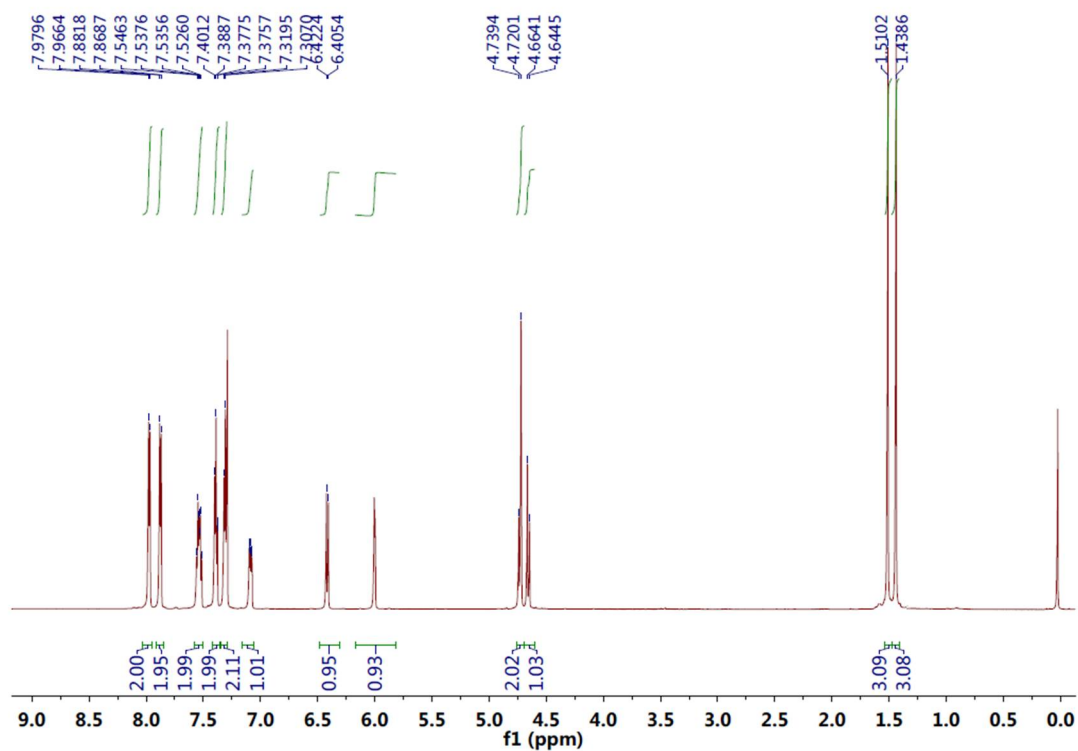

<sup>1</sup>H-NMR spectrum of compound QA-16

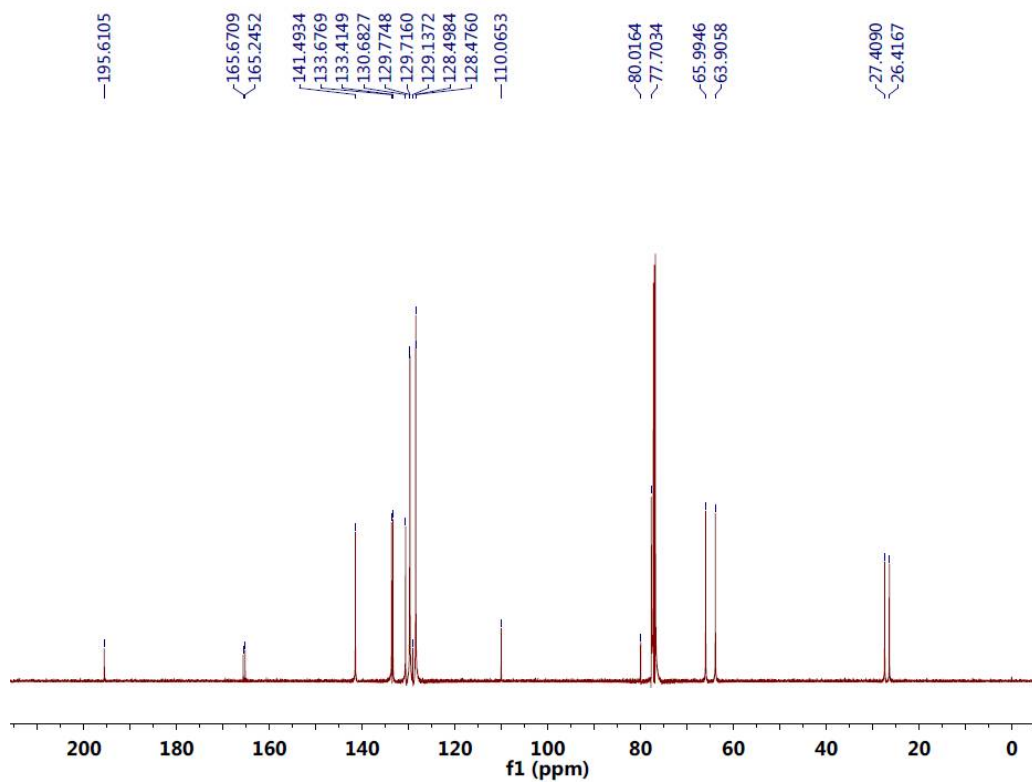

$^1\text{H}$ -NMR spectrum of compound QA-16

ZEY\_F\_190305132555 #1 RT: 0.00 AV: 1 NL: 2.32E8  
T: FTMS + c ESI Full ms [100.00-1500.00]

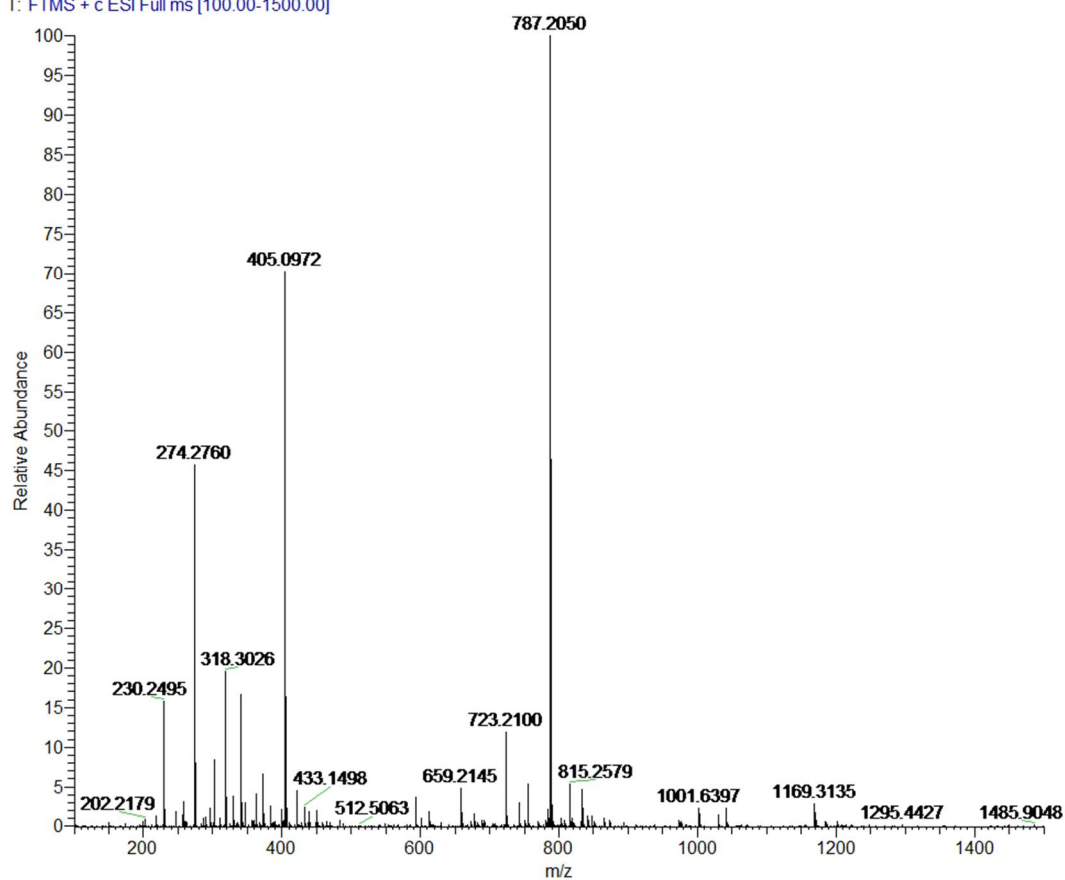

HRMS spectrum of compound (+)-zeilenone

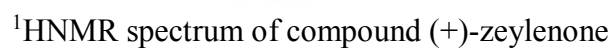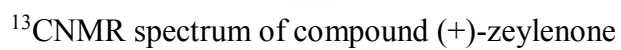

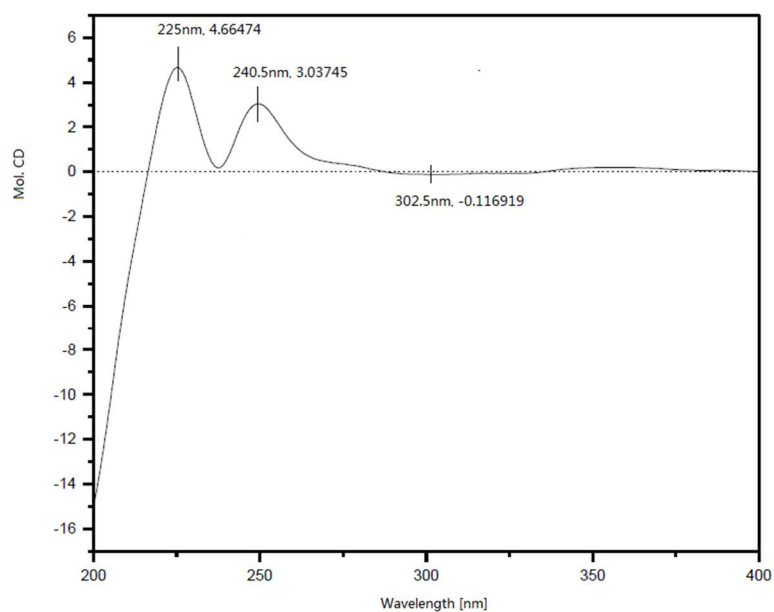

[Comments]  
Sample name zey-n  
Comment  
[Measurement Information]  
Division Name J-815  
Operator Name MBT  
Software MBTsoft  
Serial No. A024461168

Accessory Standard  
Accessory S/N A024461168  
Cell Length 1 mm

Measurement date 2019/3/11 14:18

Photometric Mode CD, HT, Abs  
Measure Range 400 - 200 nm  
Data pitch 0.5 nm  
Sensitivity Standard  
D.I.T. 1 sec  
Bandwidth 1.00 nm  
Start Mode Immediately  
Scanning Speed 100 nm/min  
Baseline Correction Baseline  
Shutter Control Auto  
CD Detector PMT  
PMT Voltage Auto  
Accumulations 2  
Solvent MECH  
Concentration 0.167 (w/v)%

[Detailed Information]  
Creation date 2019/3/13 15:56

Data array type Linear data array \* 3  
Horizontal axis Wavelength [nm]  
Vertical axis(1) Mol. CD  
Vertical axis(2) HT [V]  
Vertical axis(3) Abs  
Start 400 nm  
End 200 nm  
Data interval 0.5 nm  
Data points 401

zey-n-2-s-m.jws

CD spectrum of compound (+)-zeylenone



SZEY F\_190305132555 #1 RT: 0.00 AV: 1 NL: 1.94E8  
T: FTMS + c ESI Full ms [100.00-1500.00]

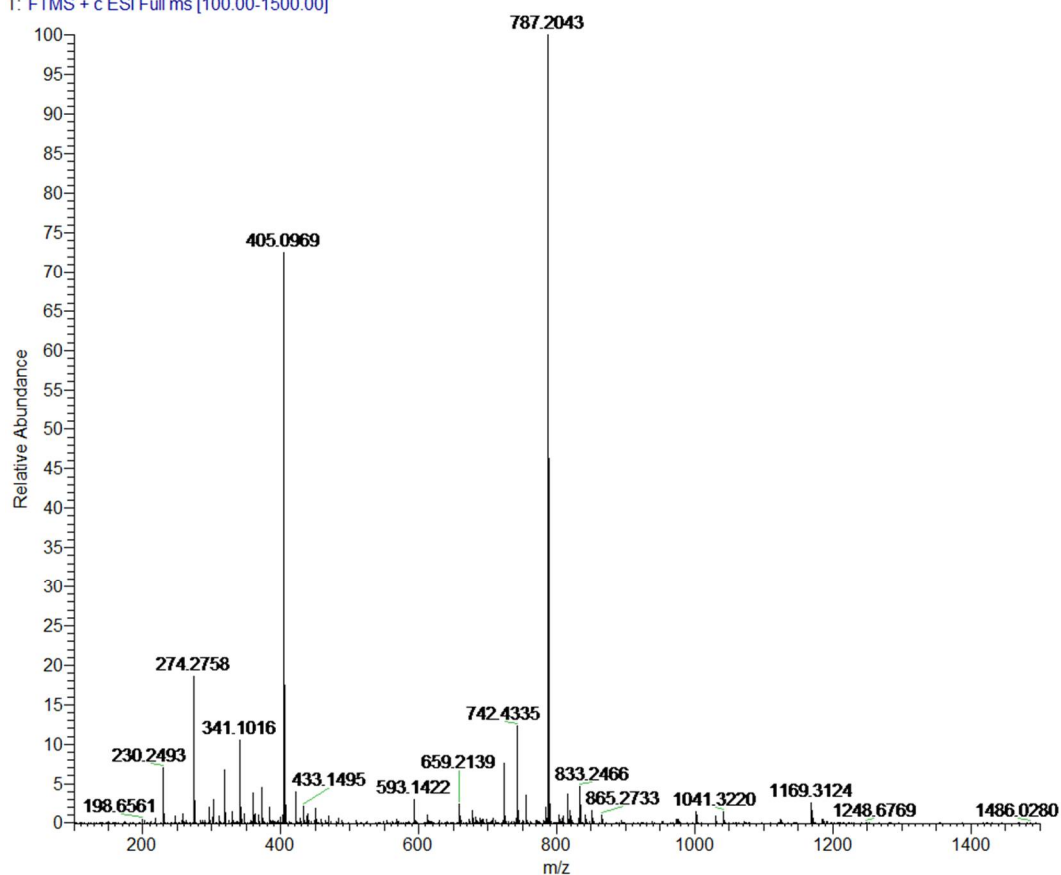

HRMS spectrum of compound (-)-zeylonone

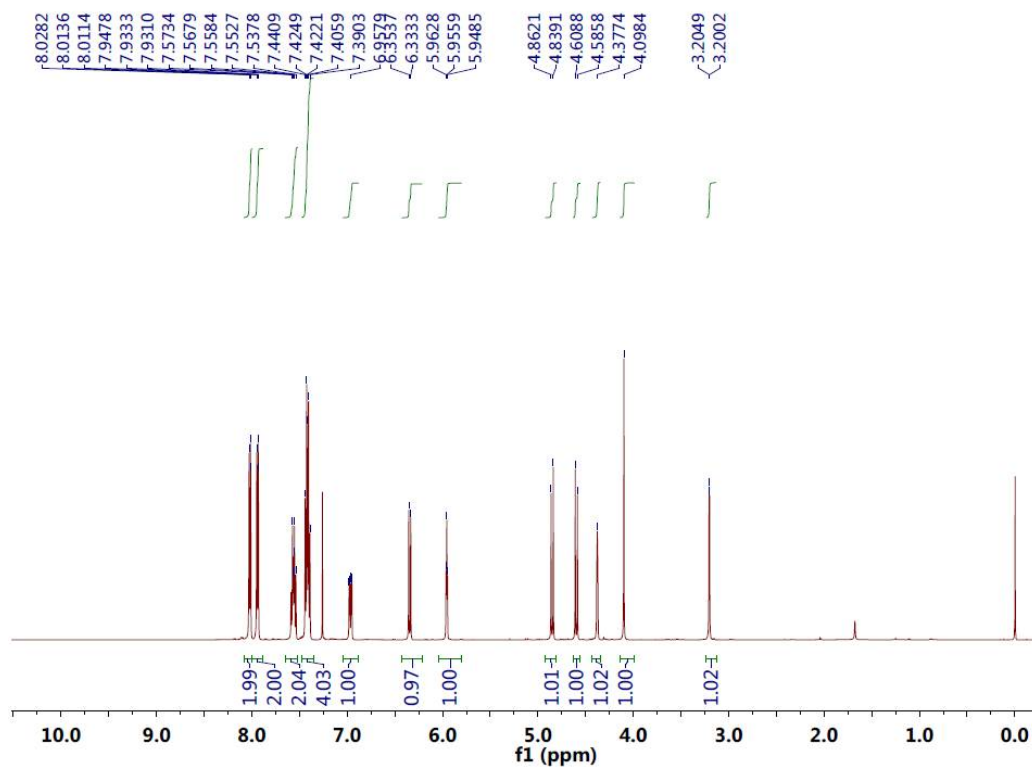

<sup>1</sup>H NMR spectrum of compound (-)-zeylonone

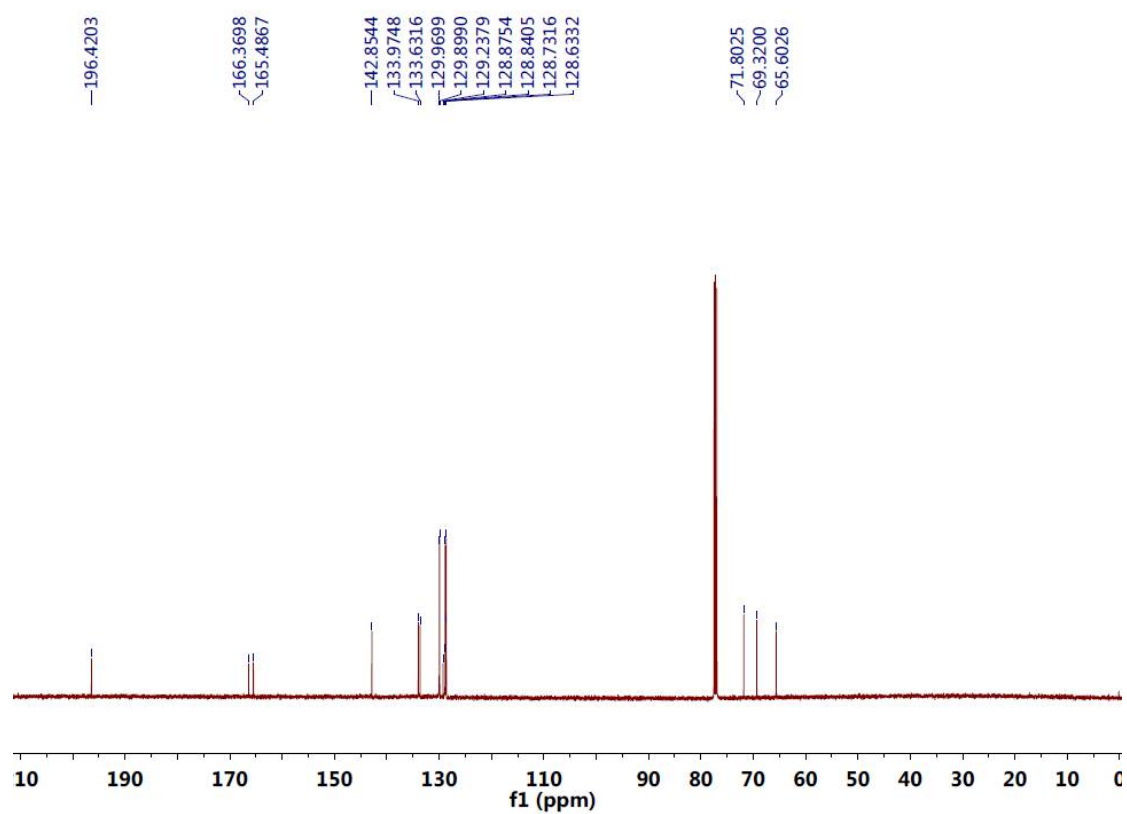

<sup>13</sup>CNMR spectrum of compound (-)-zeilenone

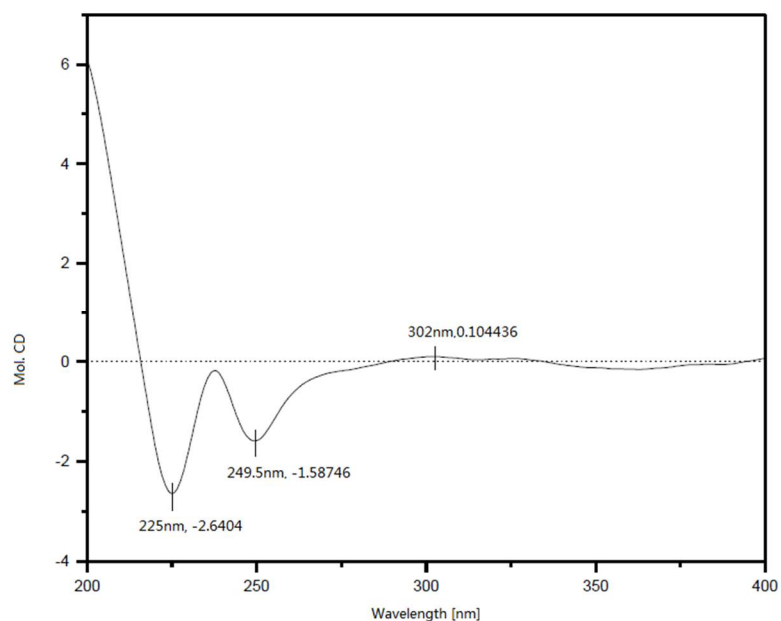

[Comments]  
Sample name zey  
Comment  
[Measurement Information]  
Division Name J-815  
Model Name J4815soft  
Serial No. A024461168

Accessory Standard  
Accessory S/N A024461168  
Cell Length 1 mm

Measurement date 2019/3/11 14:42

Photometric Mode CD, HT, Abs  
Measure Range 400 - 200 nm  
Data pitch 0.5 nm  
Sensitivity Standard  
D.I.T. 1 sec  
Bandwidth 1.00 nm  
Start Mode Immediately  
Scanning Speed 100 nm/min  
Baseline Correction Baseline  
Shutter Control Auto  
CD Detector PMT  
PMT Voltage Auto  
Accumulations 2  
Solvent MECH  
Concentration 0.167 (w/v)%

[Detailed Information]  
Creation date 2019/3/13 15:48

Data array type Linear data array \* 3  
Horizontal axis Wavelength [nm]  
Vertical axis(1) Mol. CD  
Vertical axis(2) HT [V]  
Vertical axis(3) Abs  
Start 400 nm  
End 200 nm  
Data interval 0.5 nm  
Data points 401

zey-2-s-m.jws

CD spectrum of compound (-)-zeylenone

0402-A\_F\_190402151640 #3 RT: 0.02 AV: 1 NL: 3.15E8  
T: FTMS + c ESI Full.ms [50.00-2000.00]

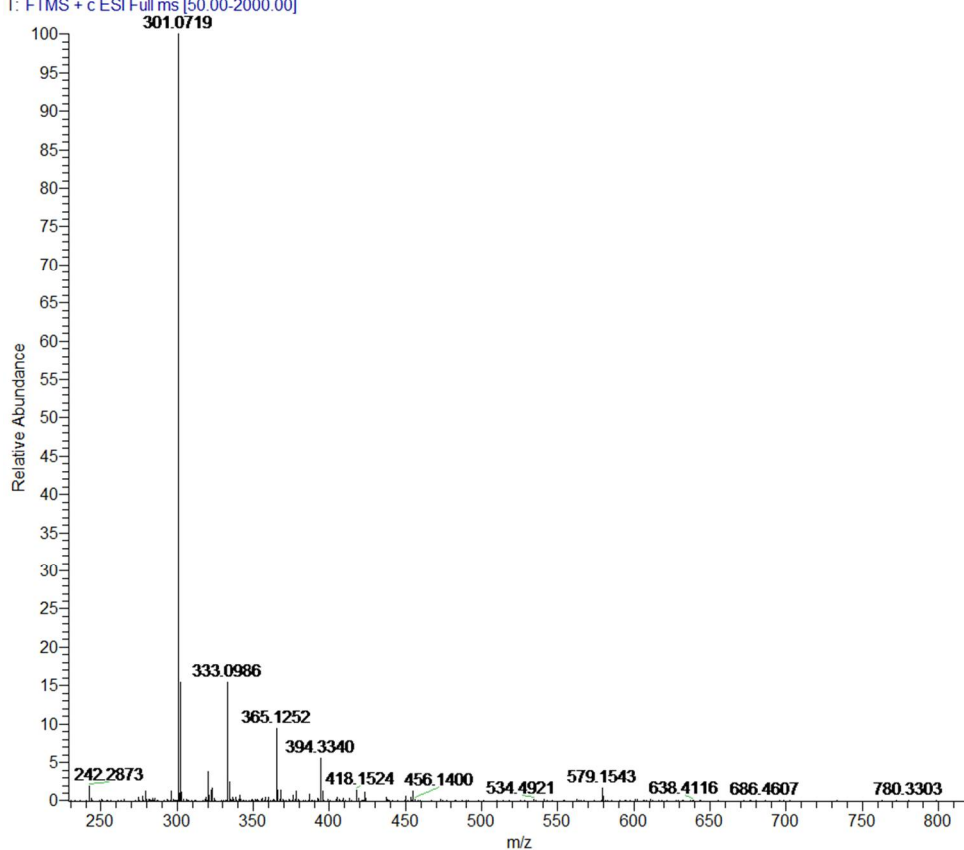

HRMS spectrum of compound Zey1

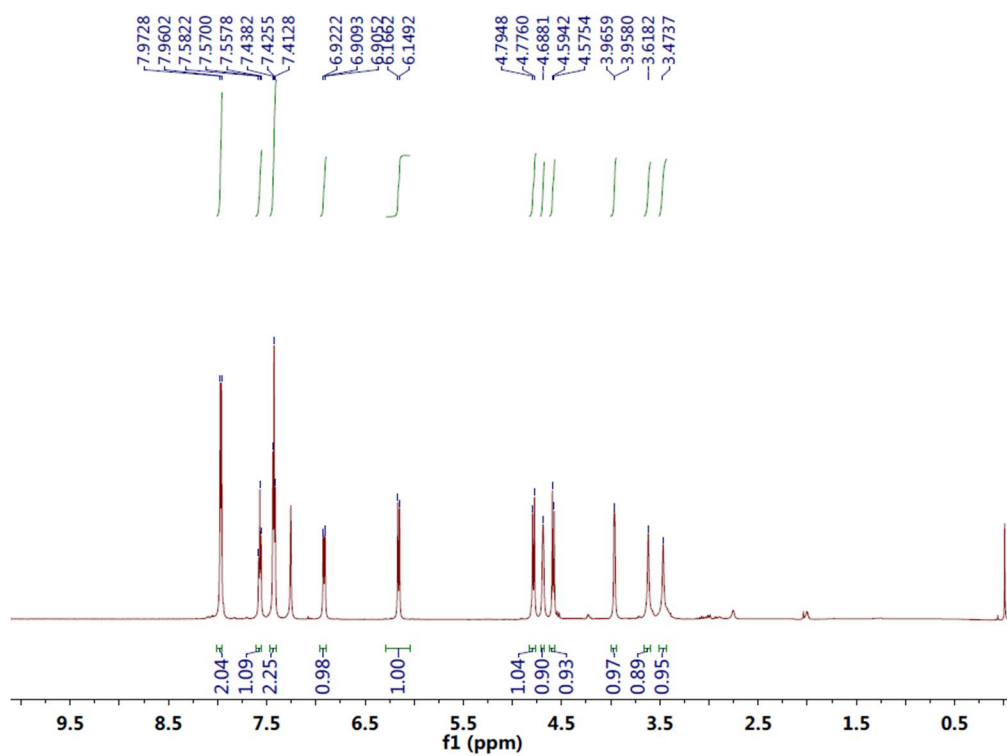

<sup>1</sup>H NMR spectrum of compound Zey1

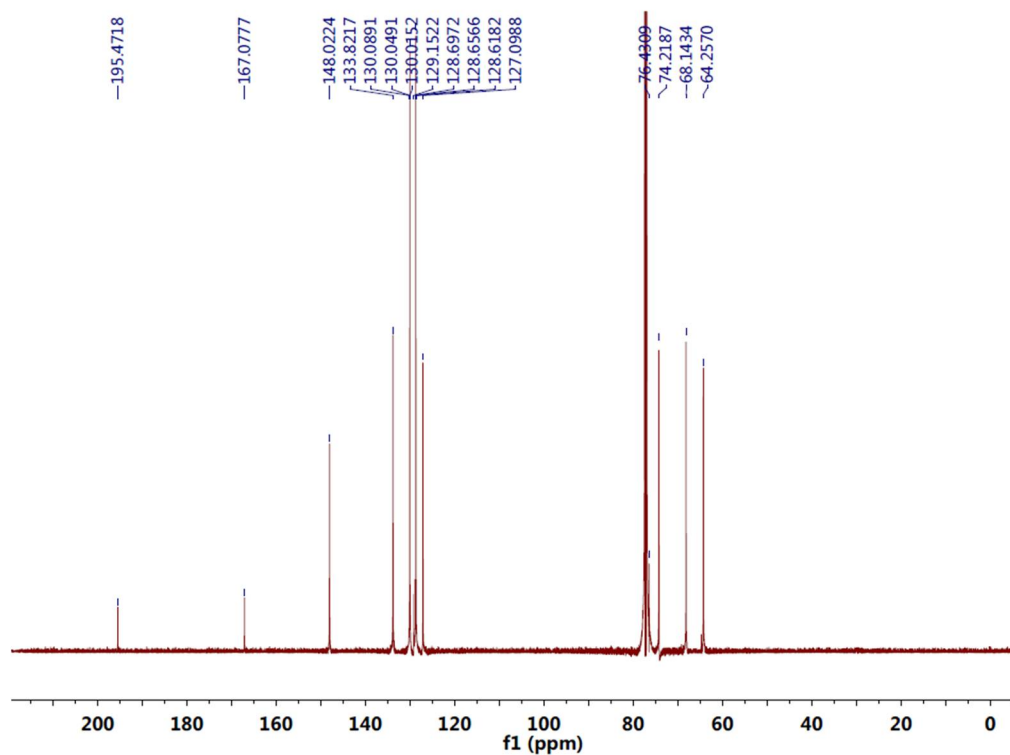

<sup>13</sup>CNMR spectrum of compound Zey1

S2-12-3-B-FT\_170629163024 #1 RT: 0.01 AV: 1 NL: 6.85E7  
T: FTMS + p ESI Full ms [200.00-2000.00]

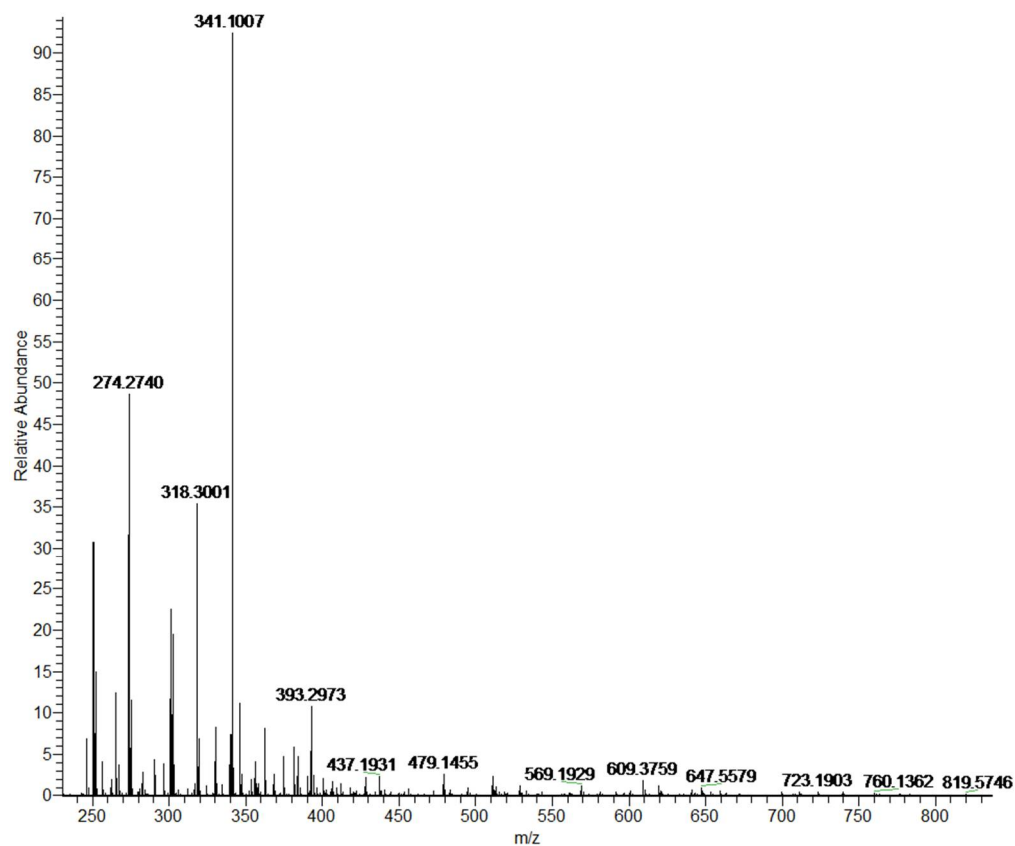

HRMS spectrum of compound Zey2

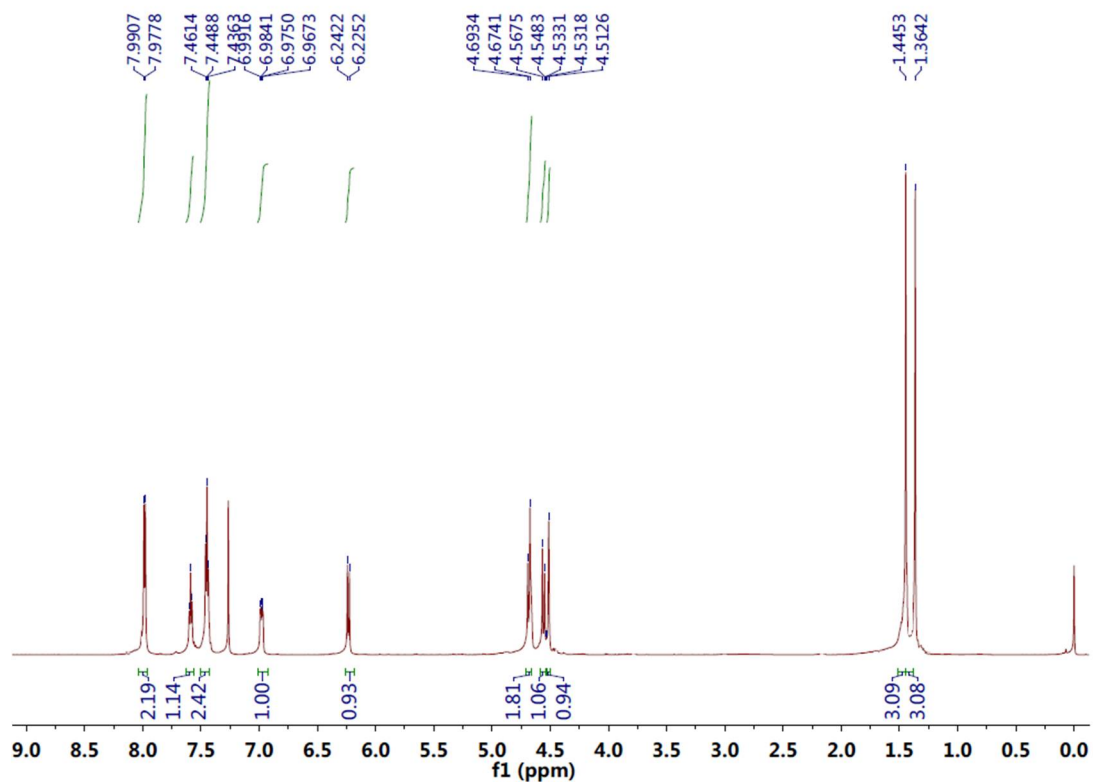

<sup>1</sup>H NMR spectrum of compound Zey2

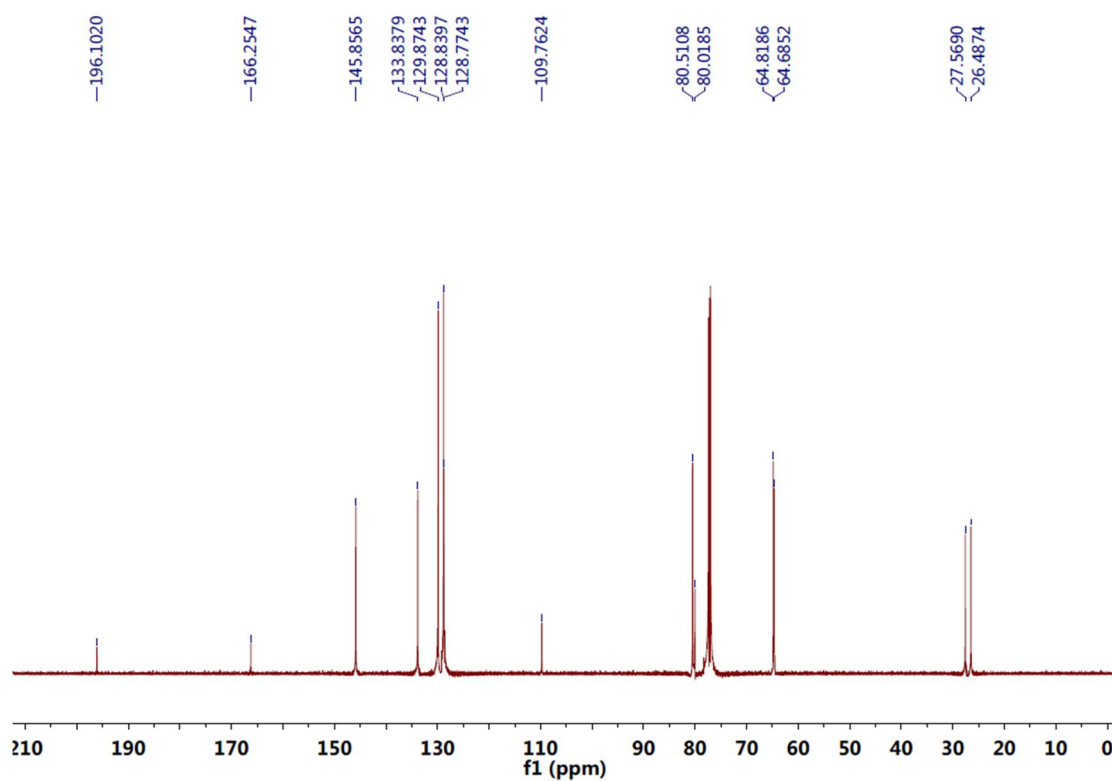

<sup>13</sup>C NMR spectrum of compound Zey2

QA3-9A-0502 F\_190318103220 #11 RT: 0.09 AV: 1 NL: 3.85E8  
T: FTMS + c ESI Full ms [50.00-1000.00]

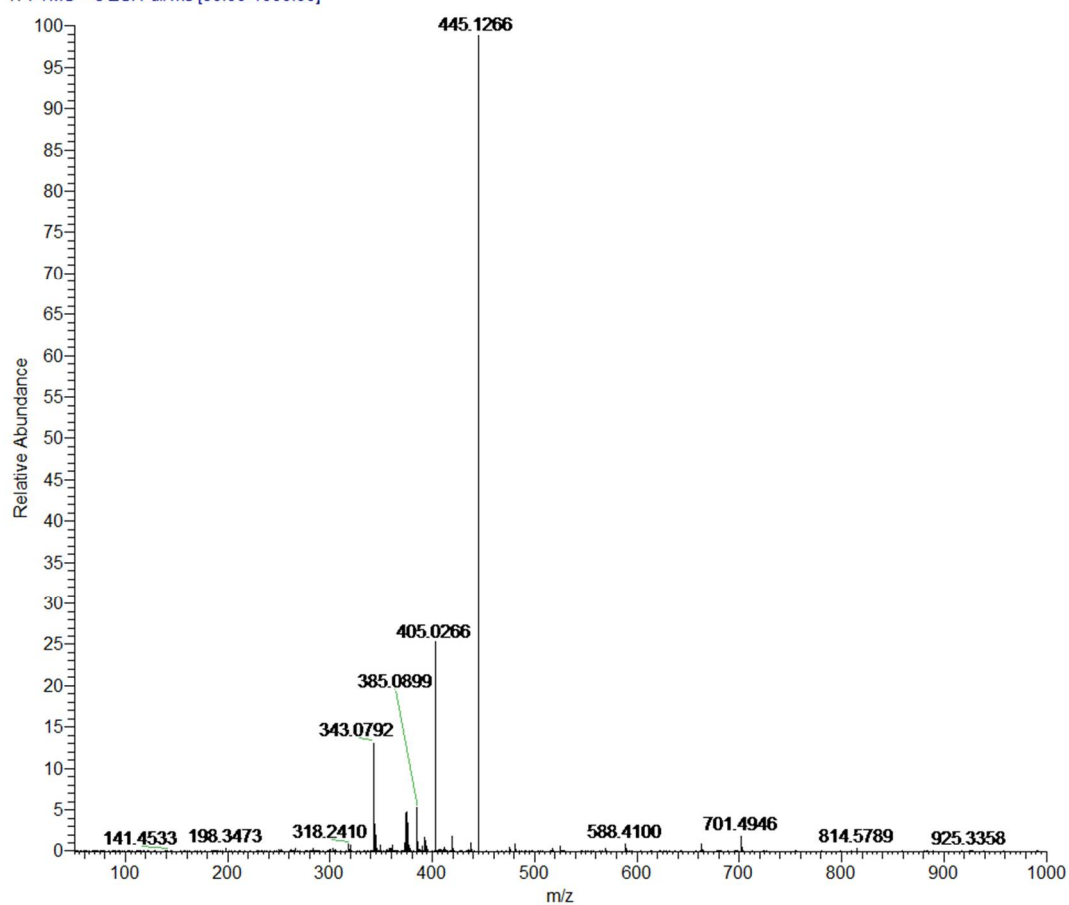

HRMS spectrum of compound Zey3

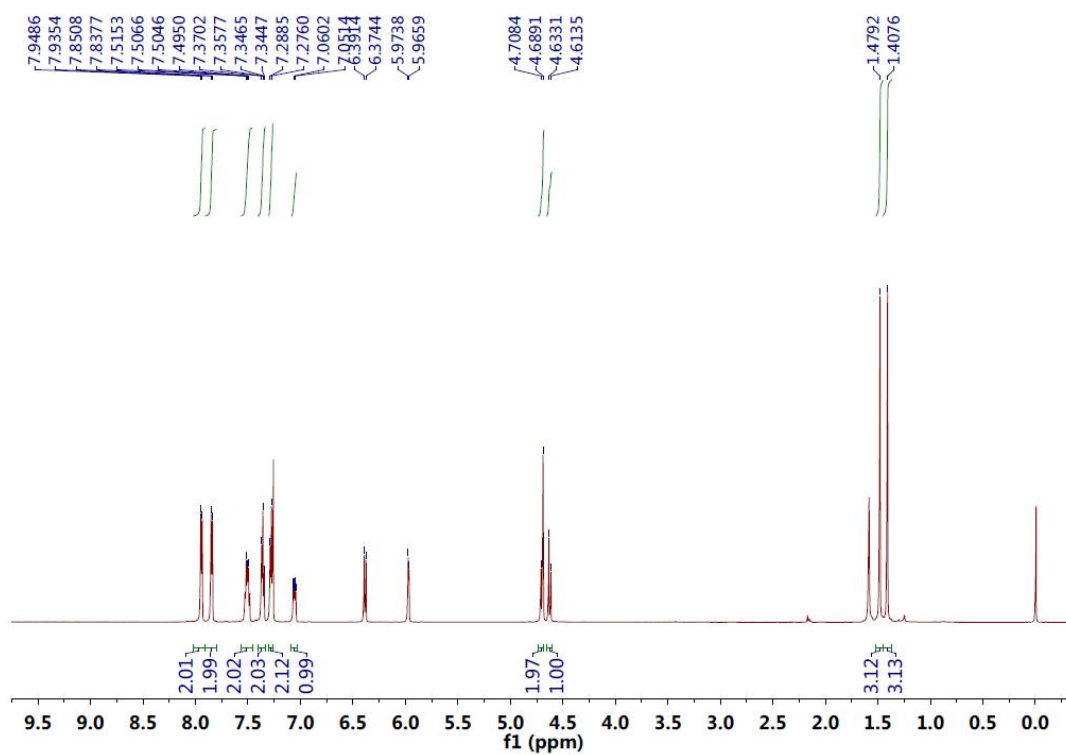

<sup>1</sup>H NMR spectrum of compound Zey3

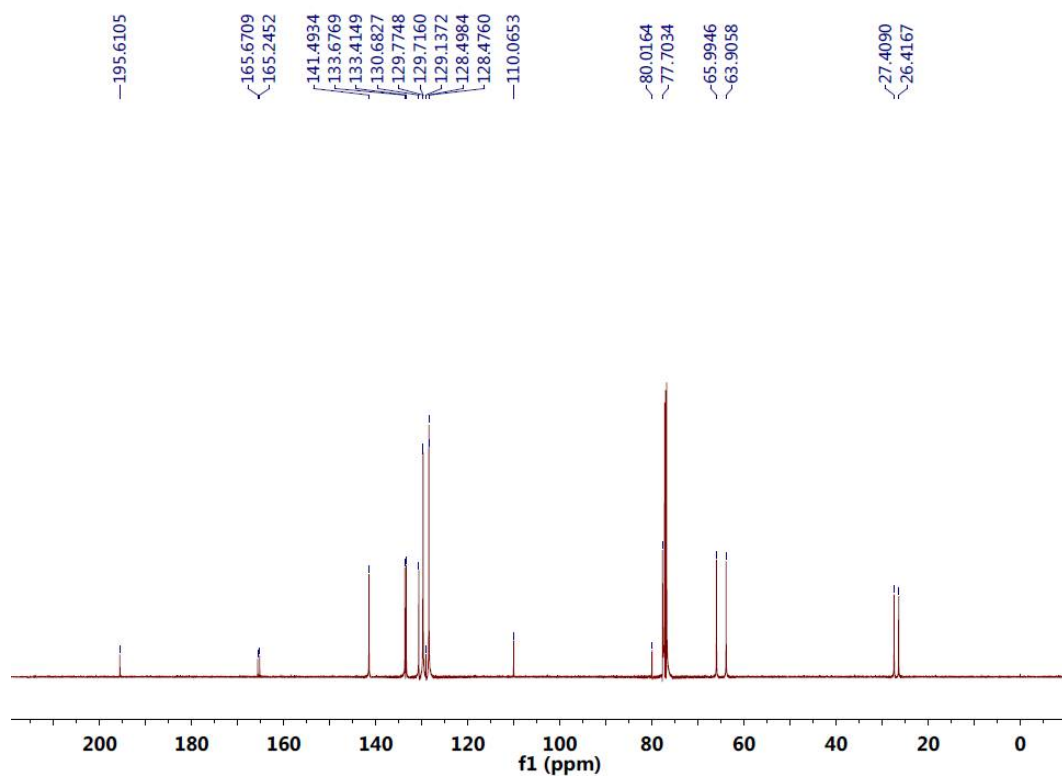

$^{13}\text{C}$ NMR spectrum of compound Zey3

Zey 3-1A F\_190305132555 #1 RT: 0.00 AV: 1 NL: 4.77E8  
T: FTMS + c ESI Full ms [100.00-1500.00]

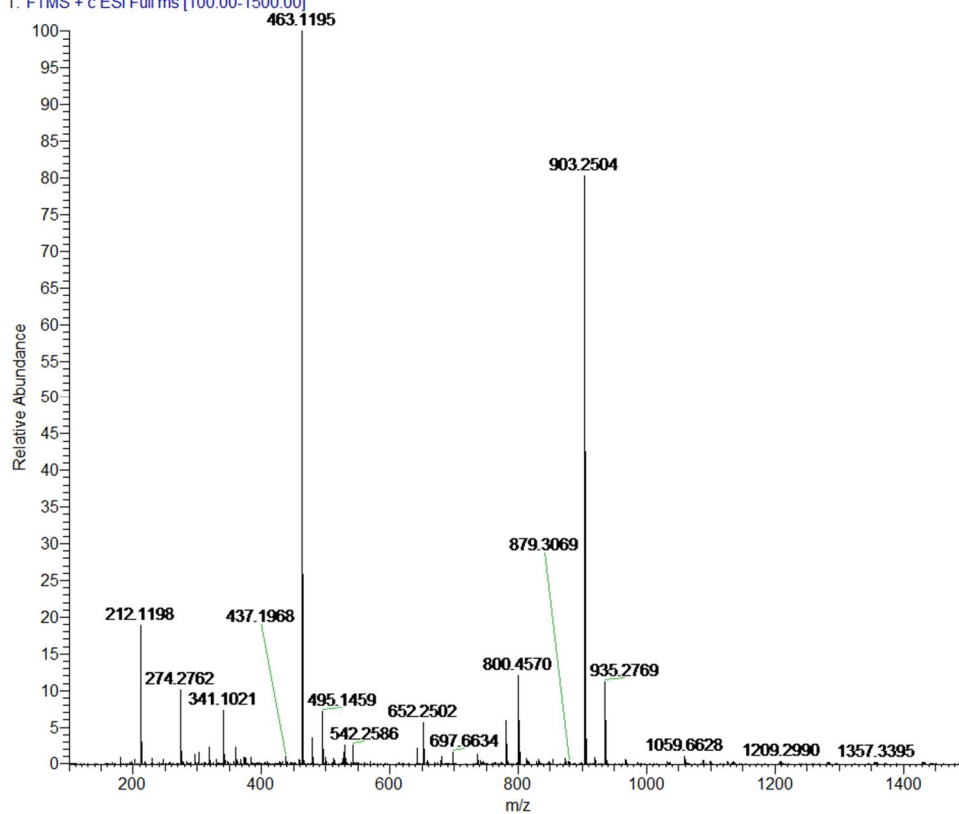

HRMS spectrum of compound Zey-A1



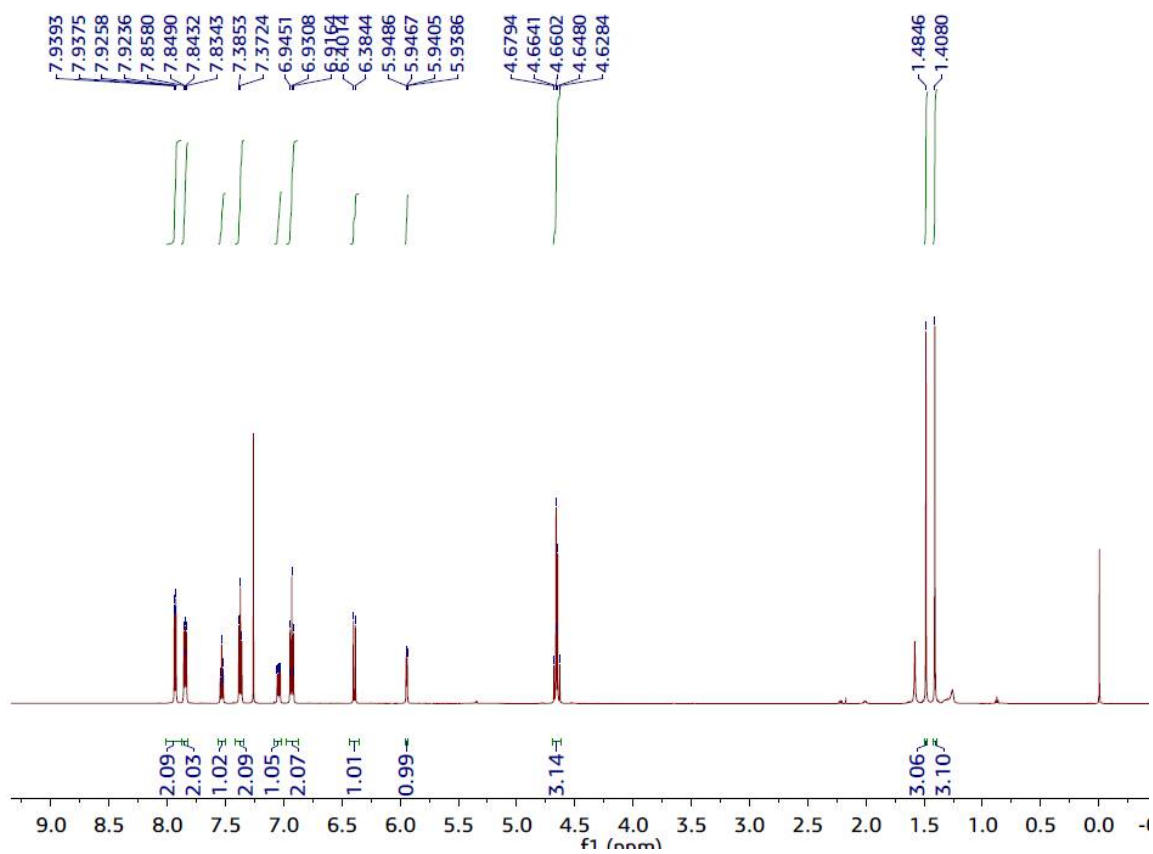

<sup>1</sup>H NMR spectrum of compound Zey-A1

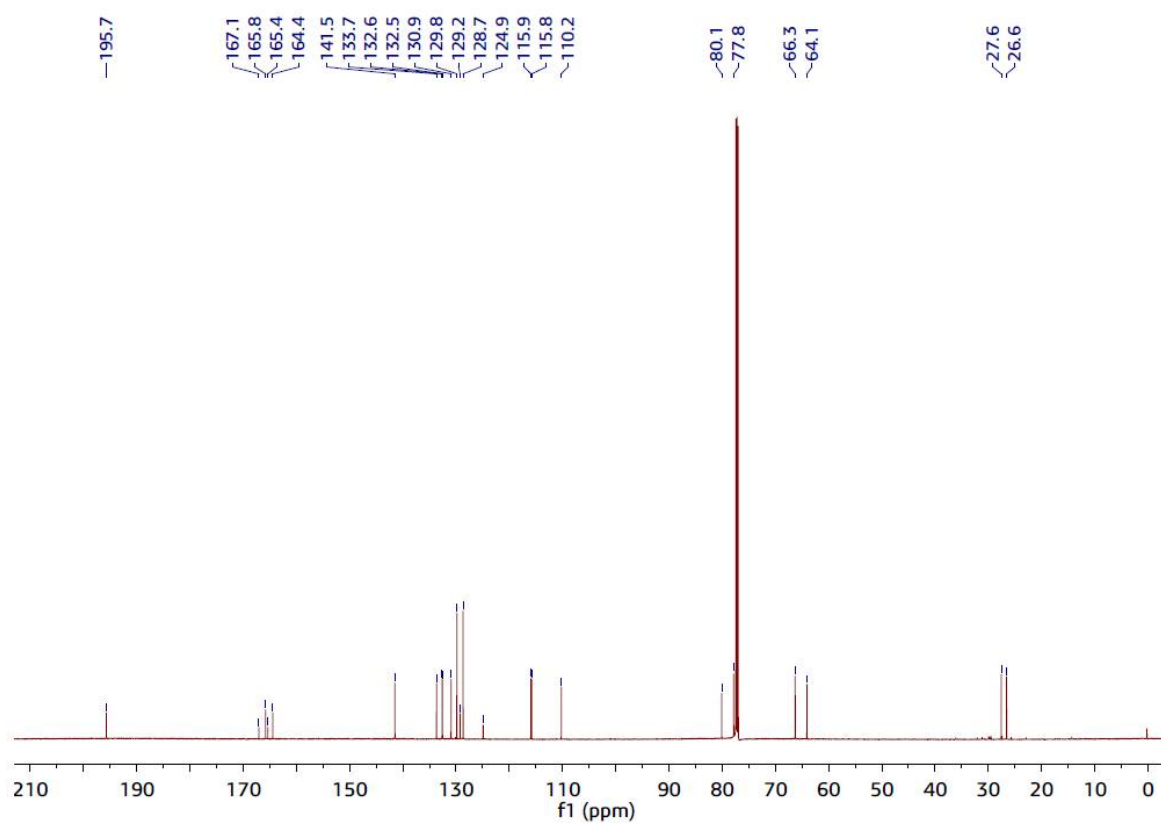

<sup>13</sup>C NMR spectrum of compound Zey-A1

ZEY 3-4A F\_190305132555 #1 RT: 0.00 AV: 1 NL: 2.37E8  
T: FTMS + c ESI Full ms [100.00-1500.00]

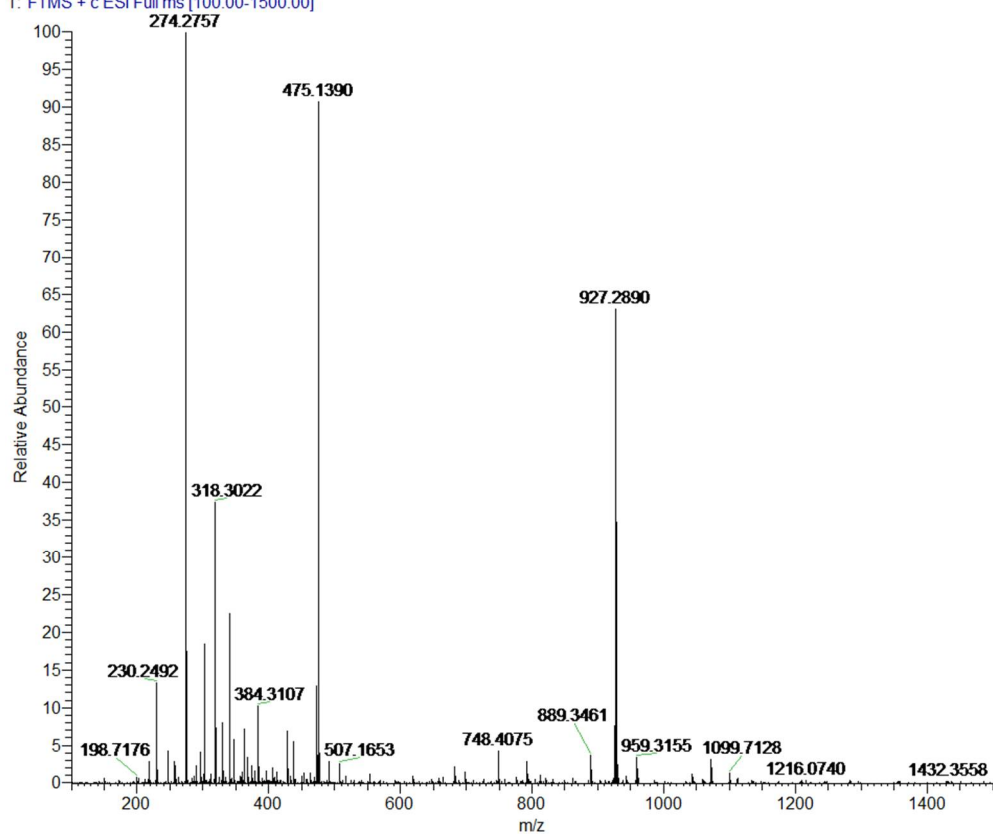

HRMS spectrum of compound Zey-A2

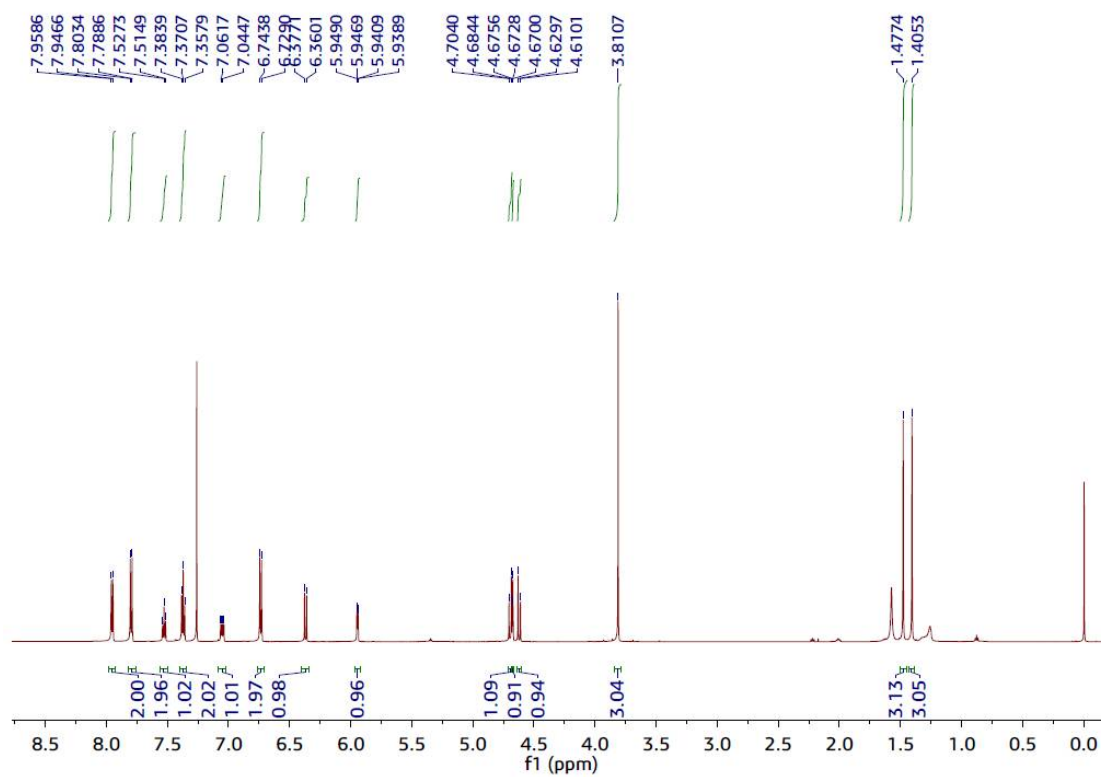

<sup>1</sup>H NMR spectrum of compound Zey-A2

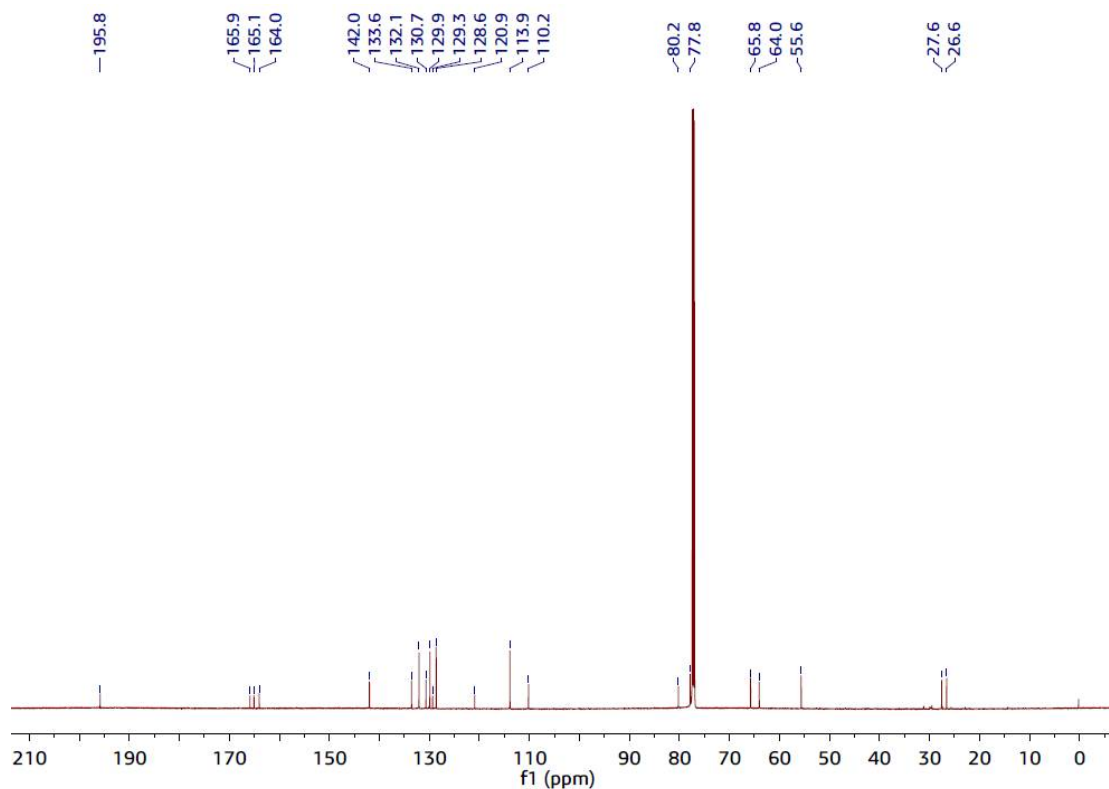

<sup>13</sup>C NMR spectrum of compound Zey-A2

ZEY 3-4 F\_190305132555 #1 RT: 0.01 AV: 1 NL: 2.15E8  
T: FTMS + c ESI Full ms [100.00-1500.00]

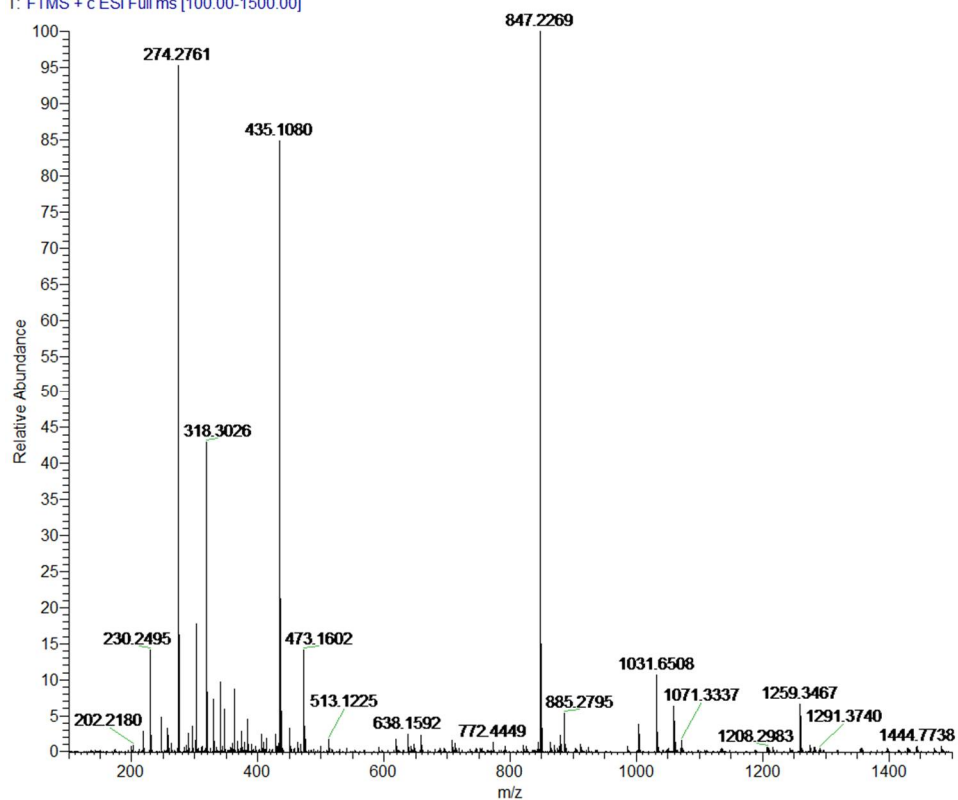

HRMS spectrum of compound Zey-A3

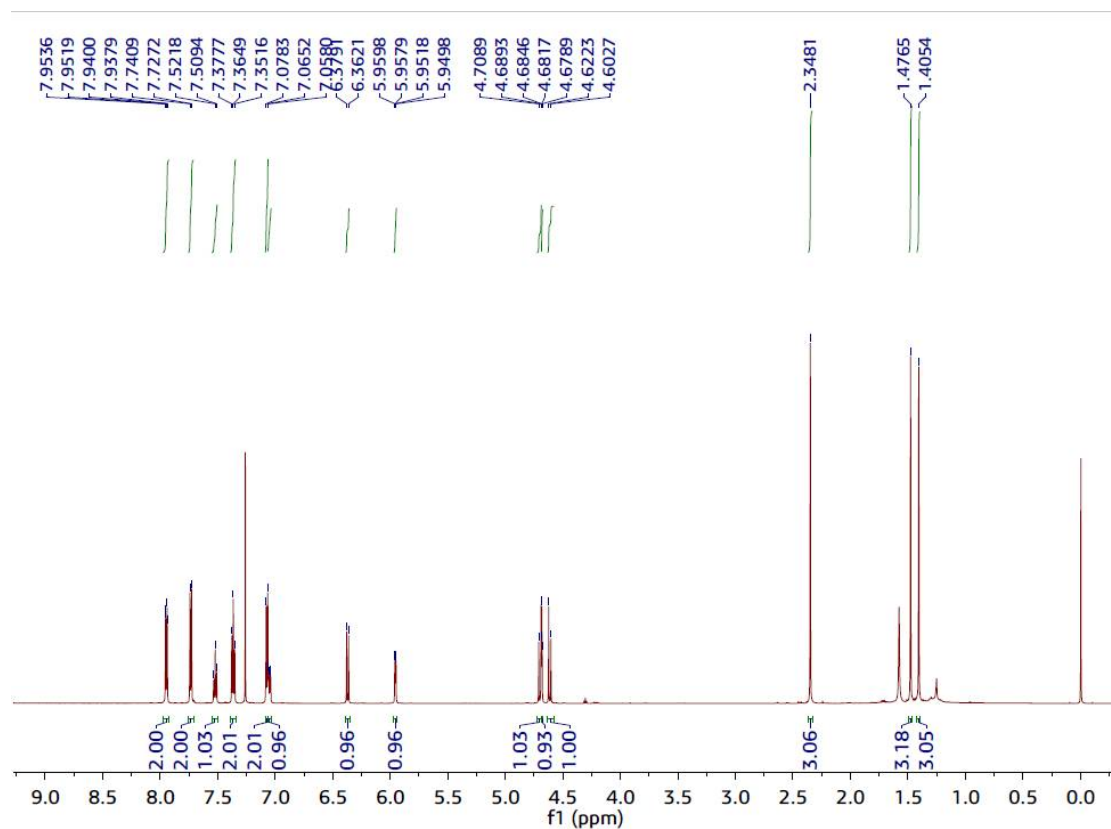

<sup>1</sup>H NMR spectrum of compound Zey-A3

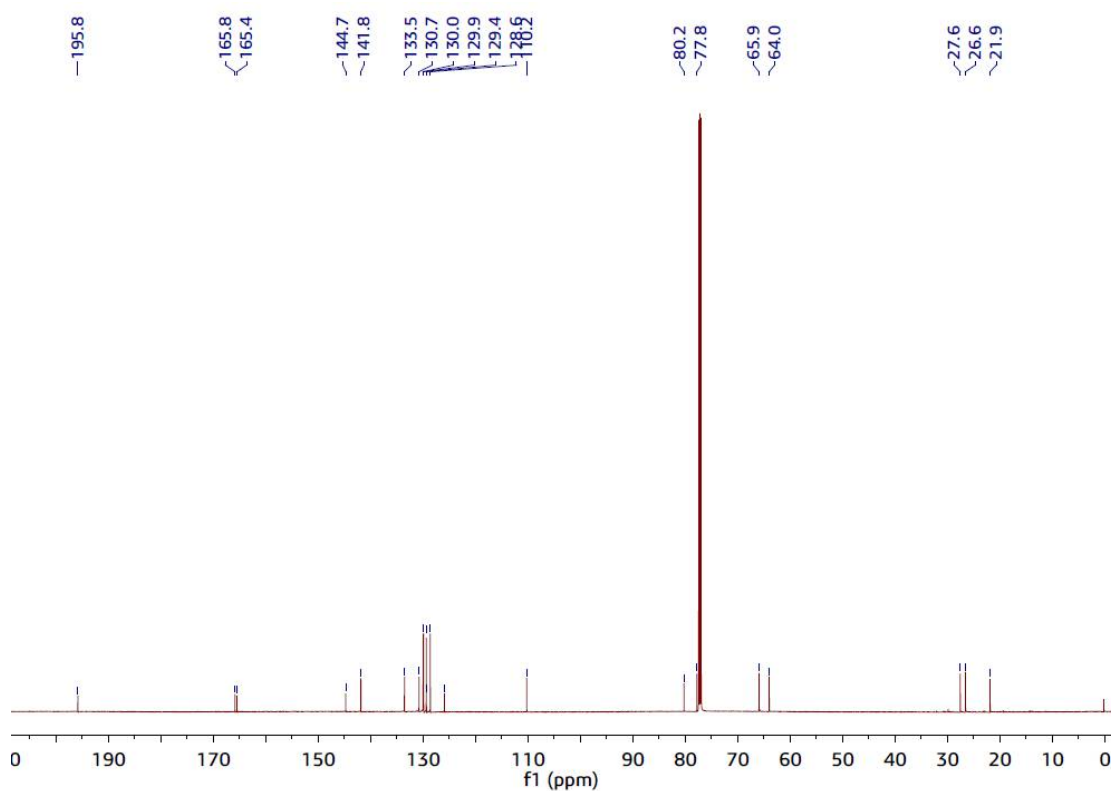

<sup>13</sup>C NMR spectrum of compound Zey-A3

3-2 F\_190318103220 #1 RT: 0.00 AV: 1 NL: 2.66E8  
T: FTMS + c ESI Full ms [50.00-1000.00]

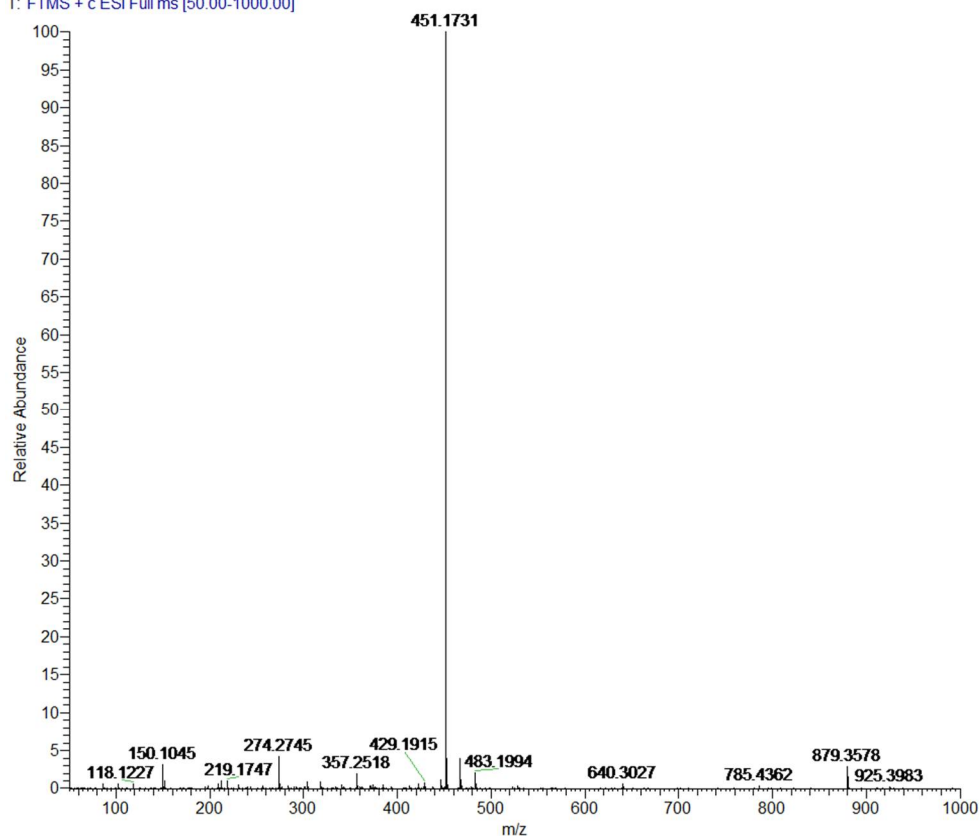

HRMS spectrum of compound Zey-A4

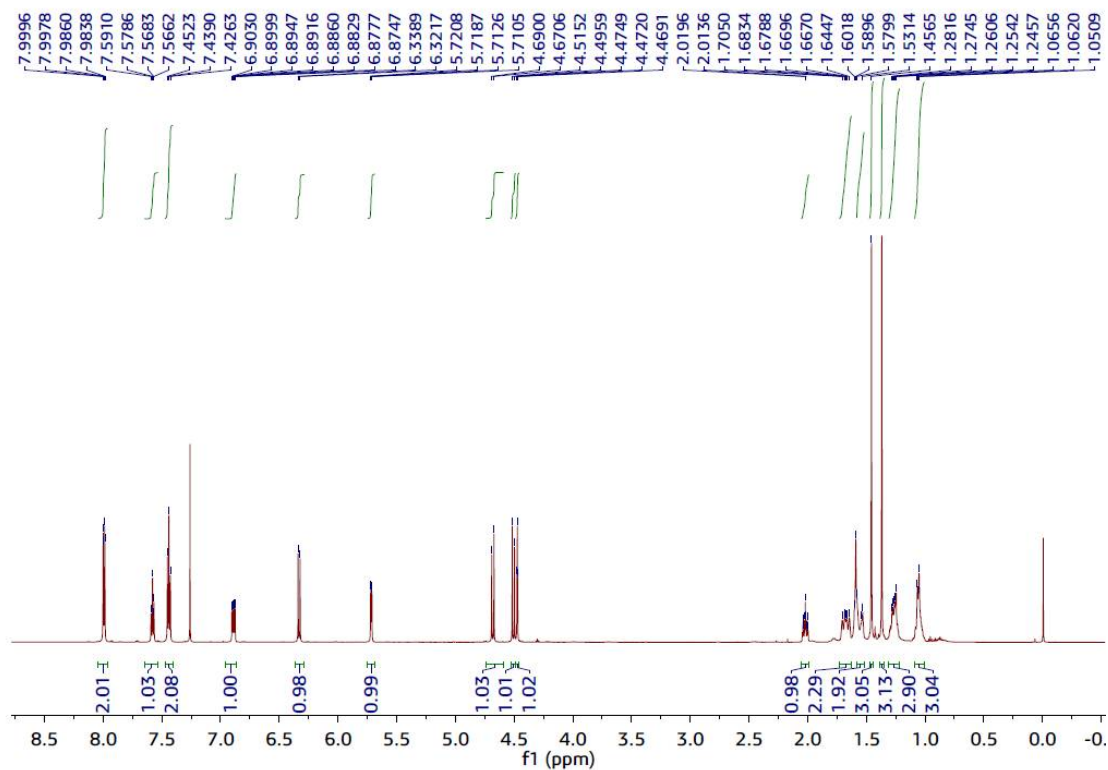

<sup>1</sup>H NMR spectrum of compound Zey-A4

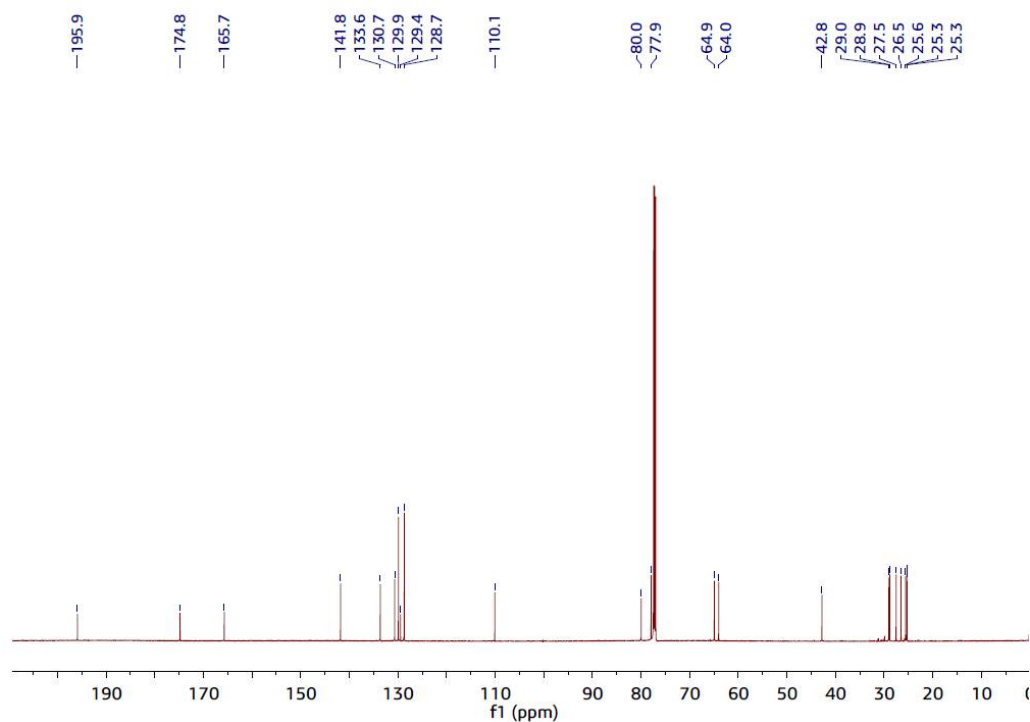

$^{13}\text{C}$ NMR spectrum of compound Zey-A4

ZEY 3-3 F\_190305132555 #1 RT: 0.01 AV: 1 NL: 3.32E8  
T: FTMS + c ESI Full ms [100.00-1500.00]

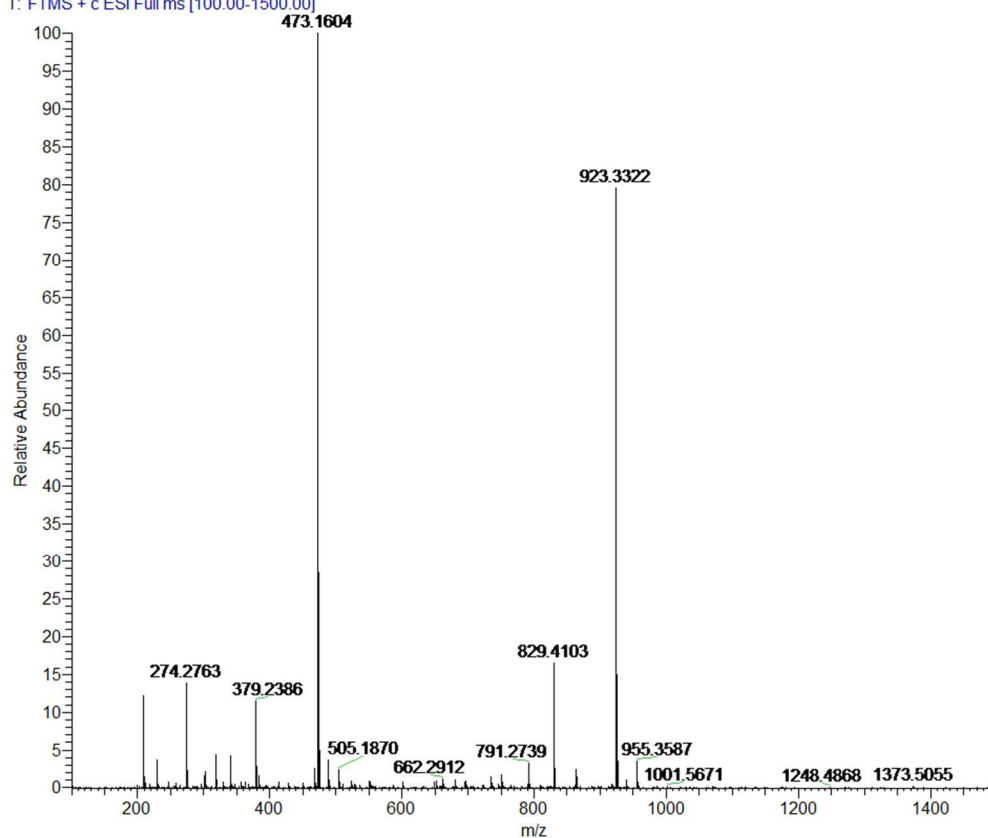

HRMS spectrum of compound Zey-A5

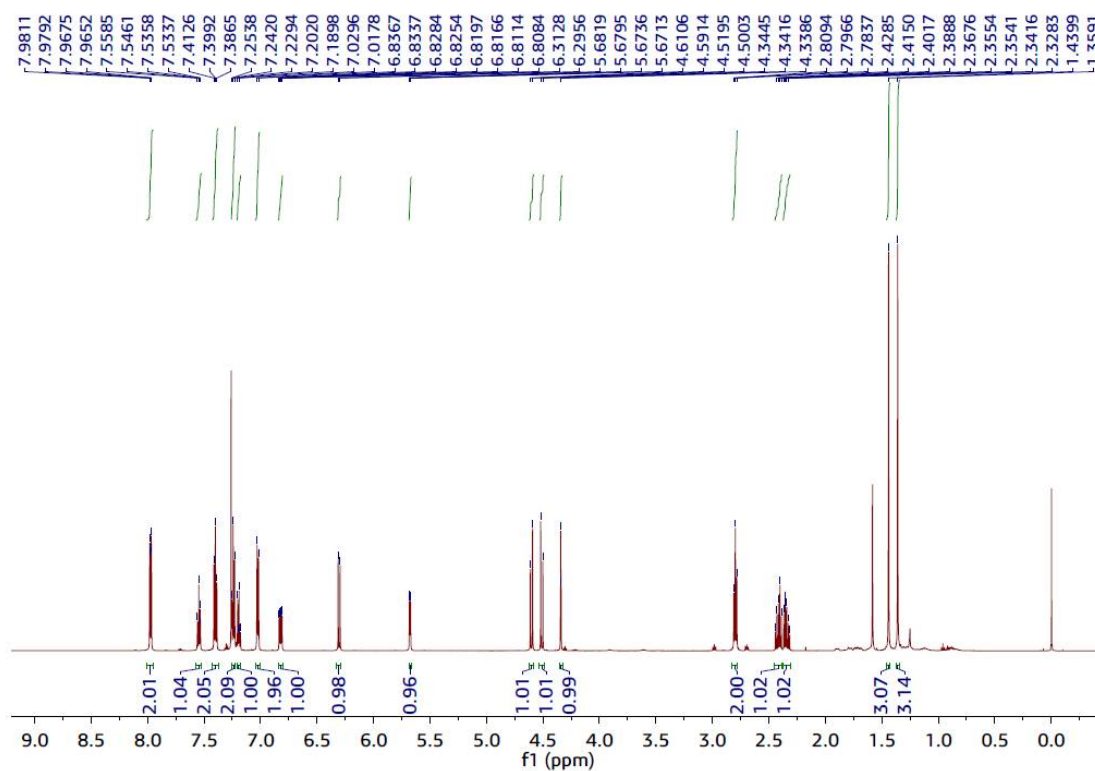

<sup>1</sup>H NMR spectrum of compound Zey-A5

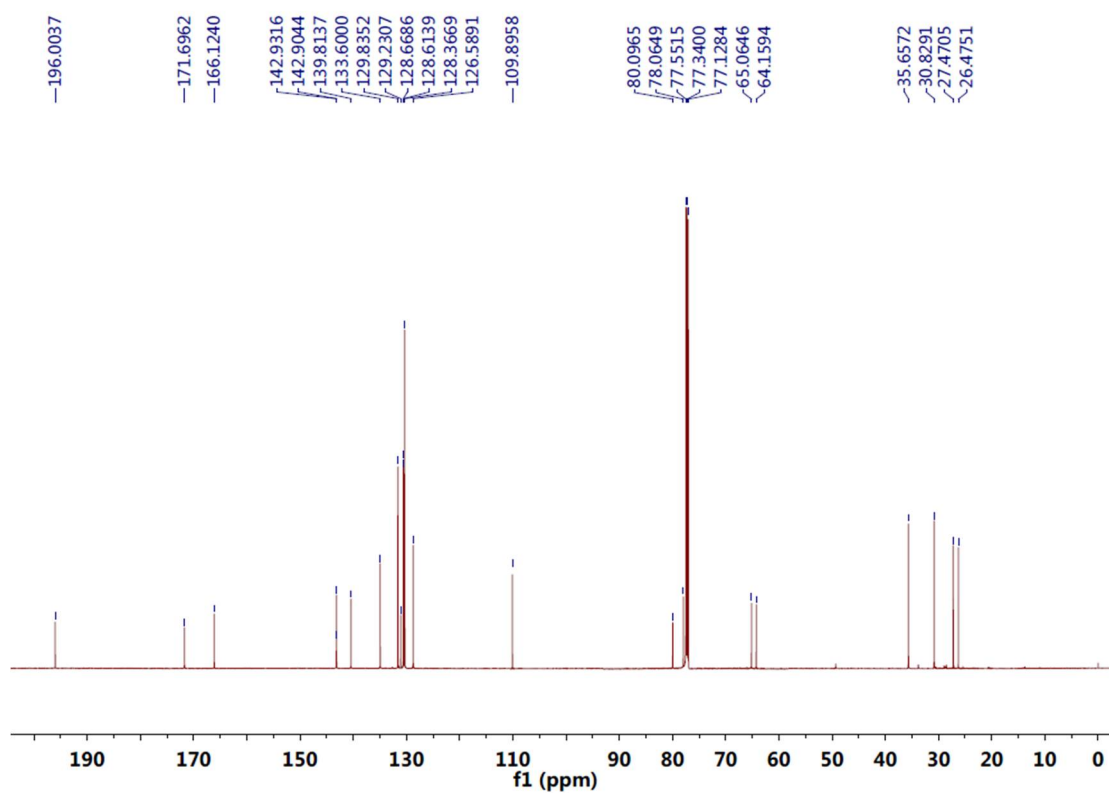

<sup>13</sup>C NMR spectrum of compound Zey-A5

ZEY 3-6A\_F\_190305132555 #1 RT: 0.01 AV: 1 NL: 5.48E7  
T: FTMS + c ESI Full ms [100.00-1500.00]

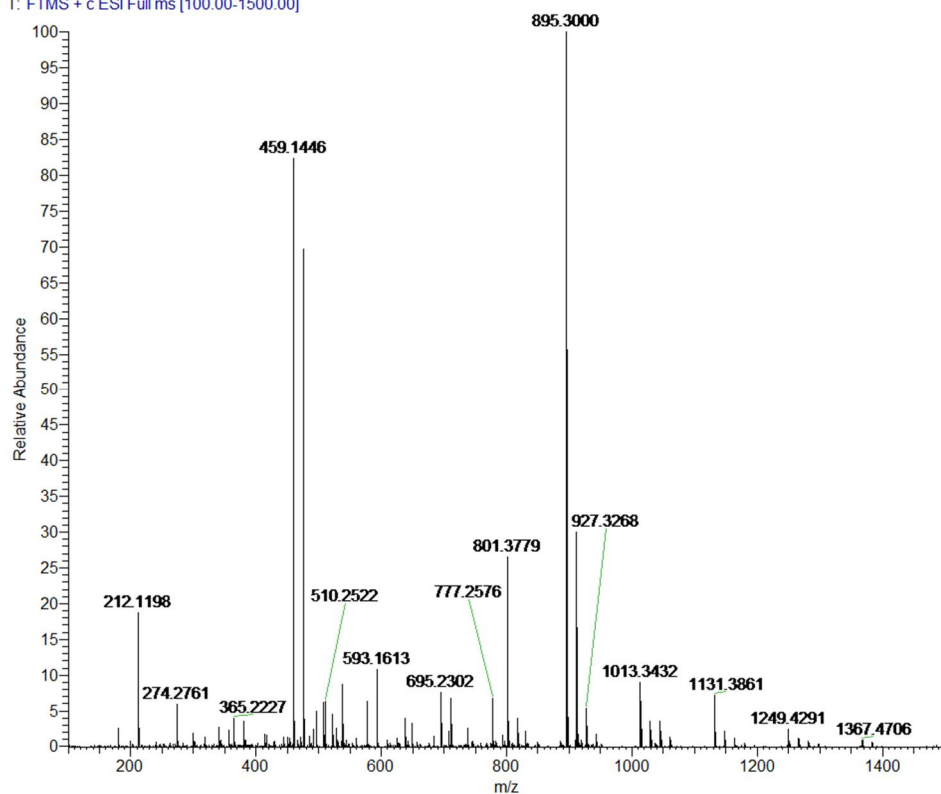

HRMS spectrum of compound Zey-A6

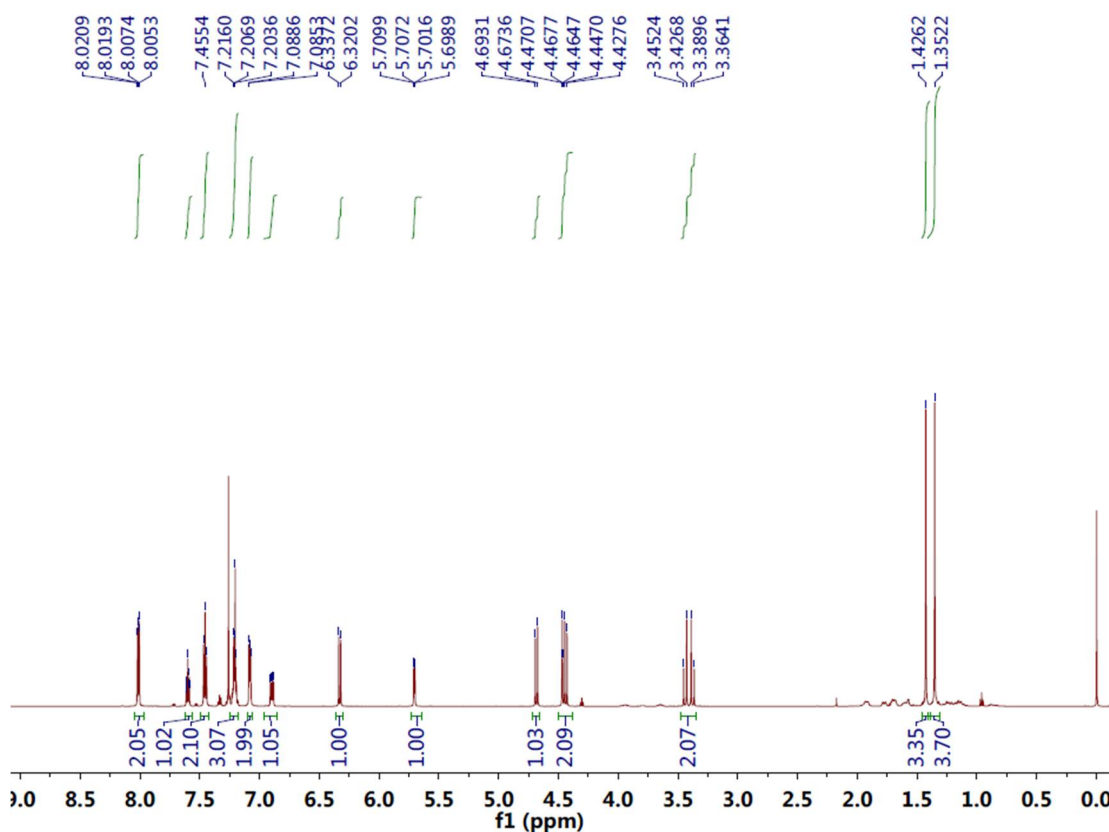

<sup>1</sup>H NMR spectrum of compound Zey-A6



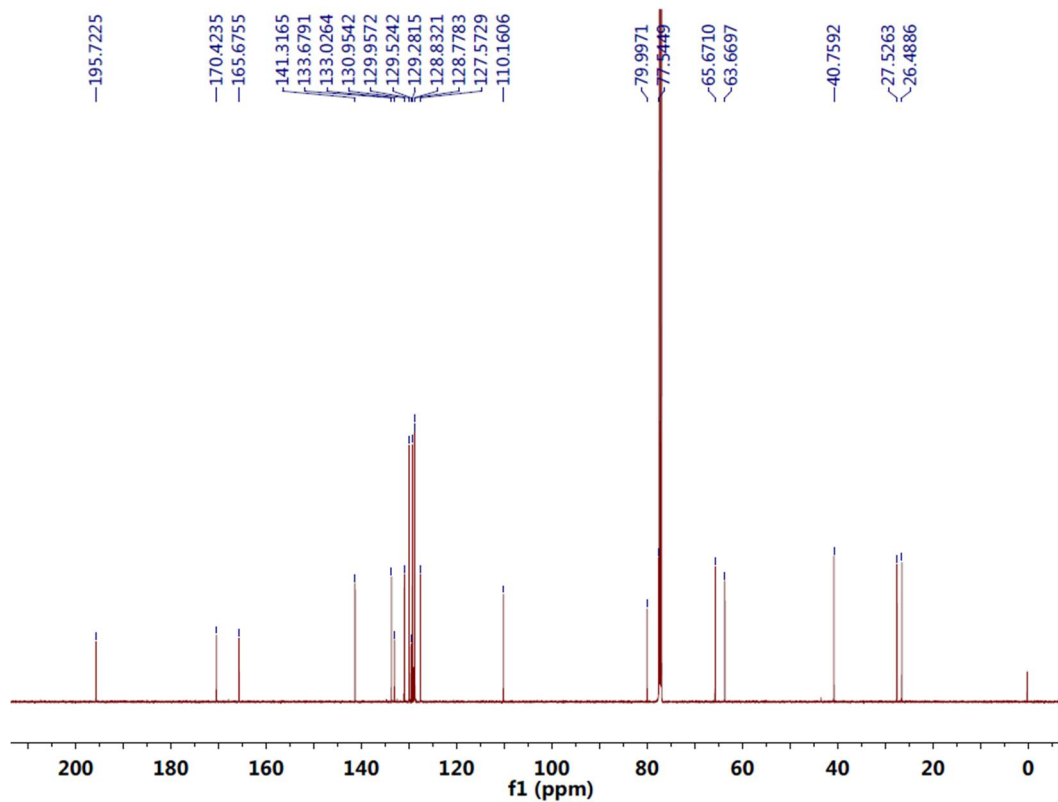

$^{13}\text{C}$ NMR spectrum of compound Zey-A6

3-1 F\_190318103220 #1 RT: 0.00 AV: 1 NL: 2.56E7  
T: FTMS + c ESI Full ms [50.00-1000.00]

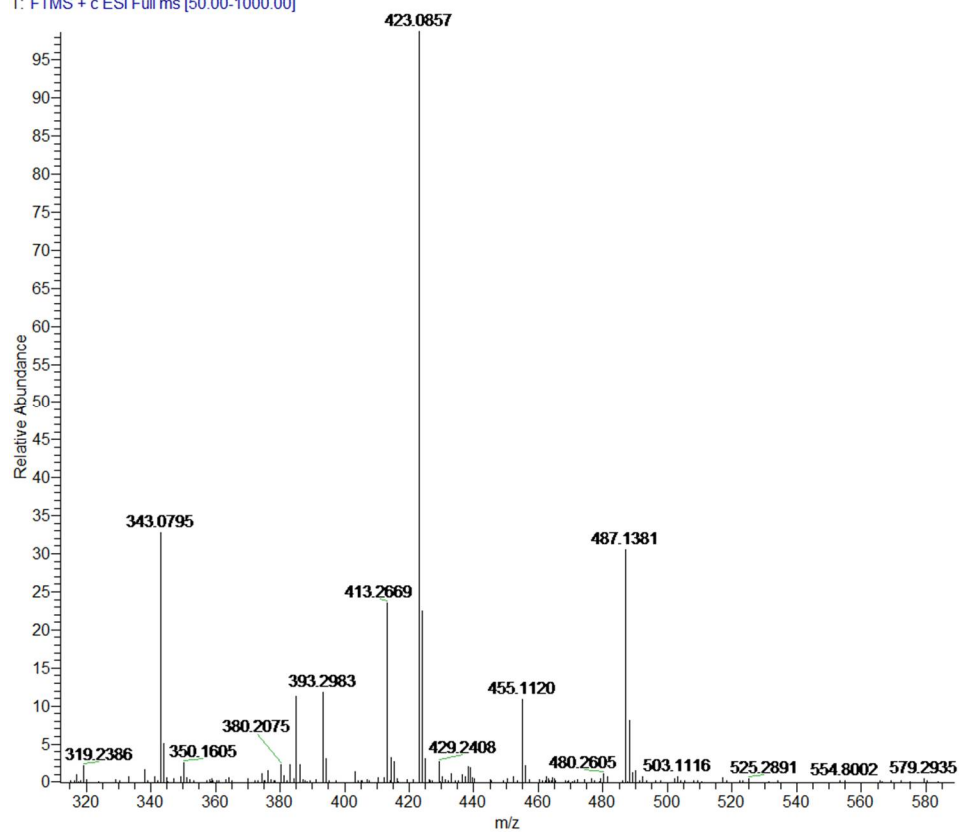

HRMS spectrum of compound Zey-B1

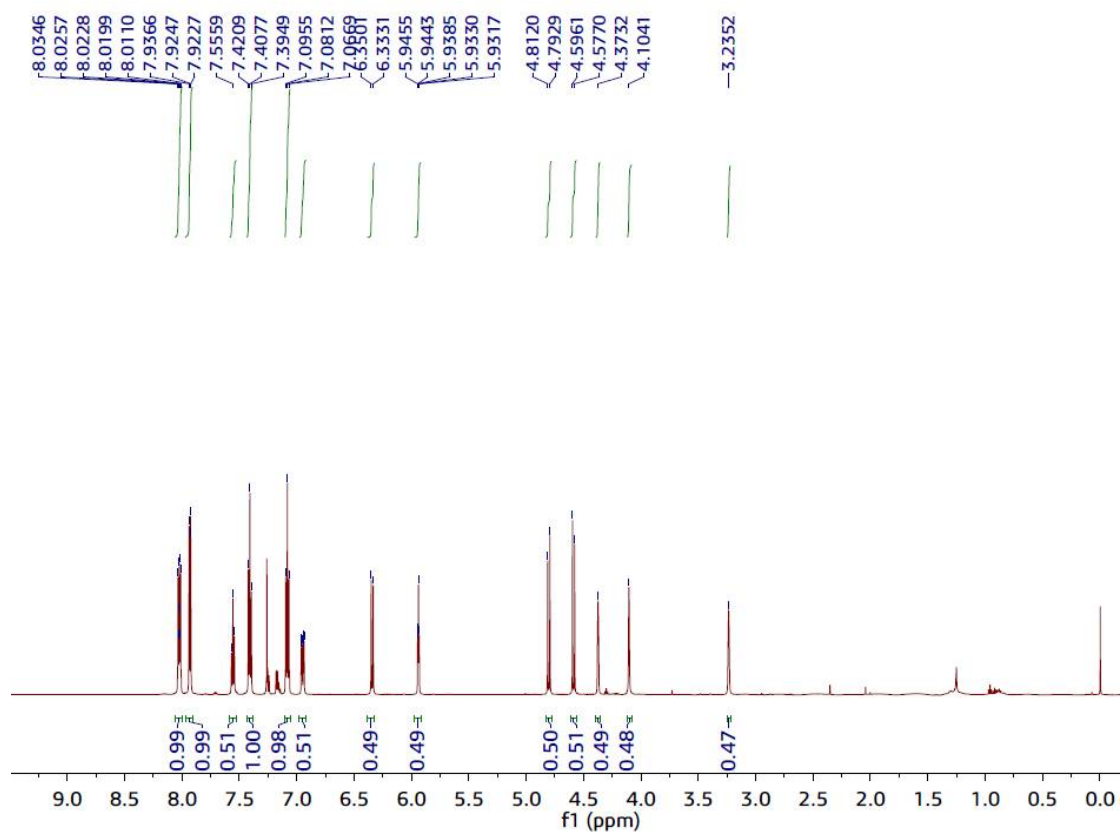

<sup>1</sup>H NMR spectrum of compound Zey-B1

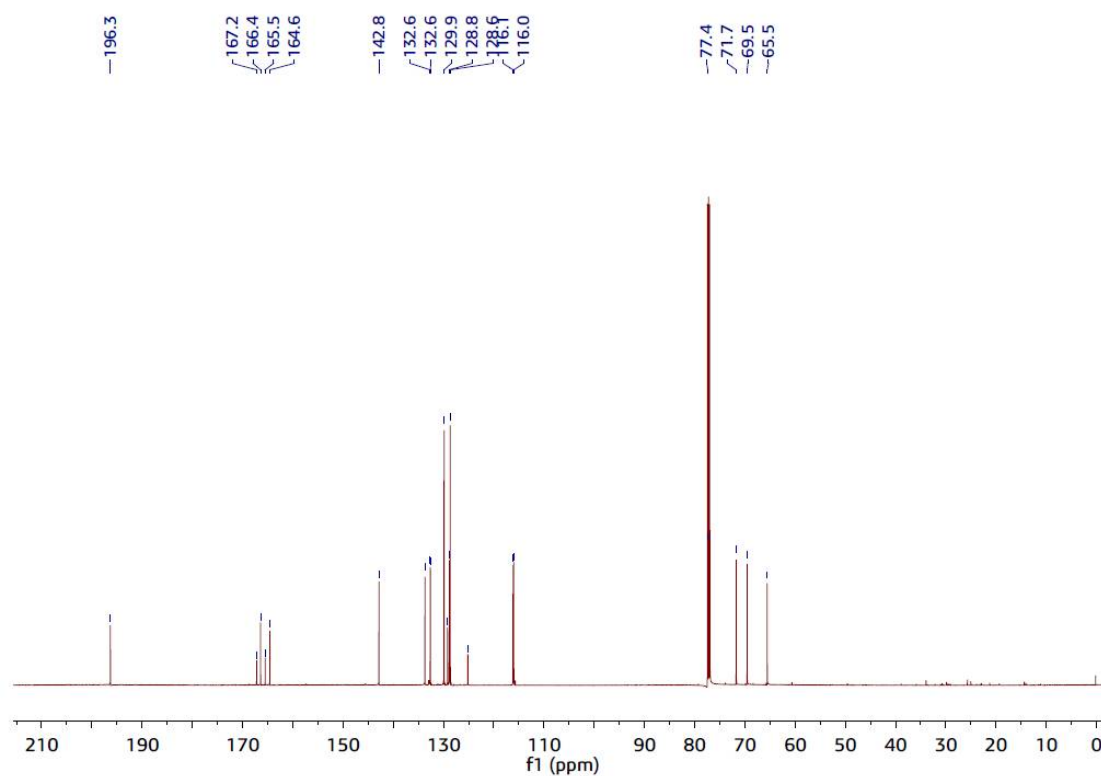

<sup>13</sup>C NMR spectrum of compound Zey-B1

ZEY 3-4 F\_190305132555 #1 RT: 0.01 AV: 1 NL: 2.15E8  
T: FTMS + c ESI Full ms [100.00-1500.00]

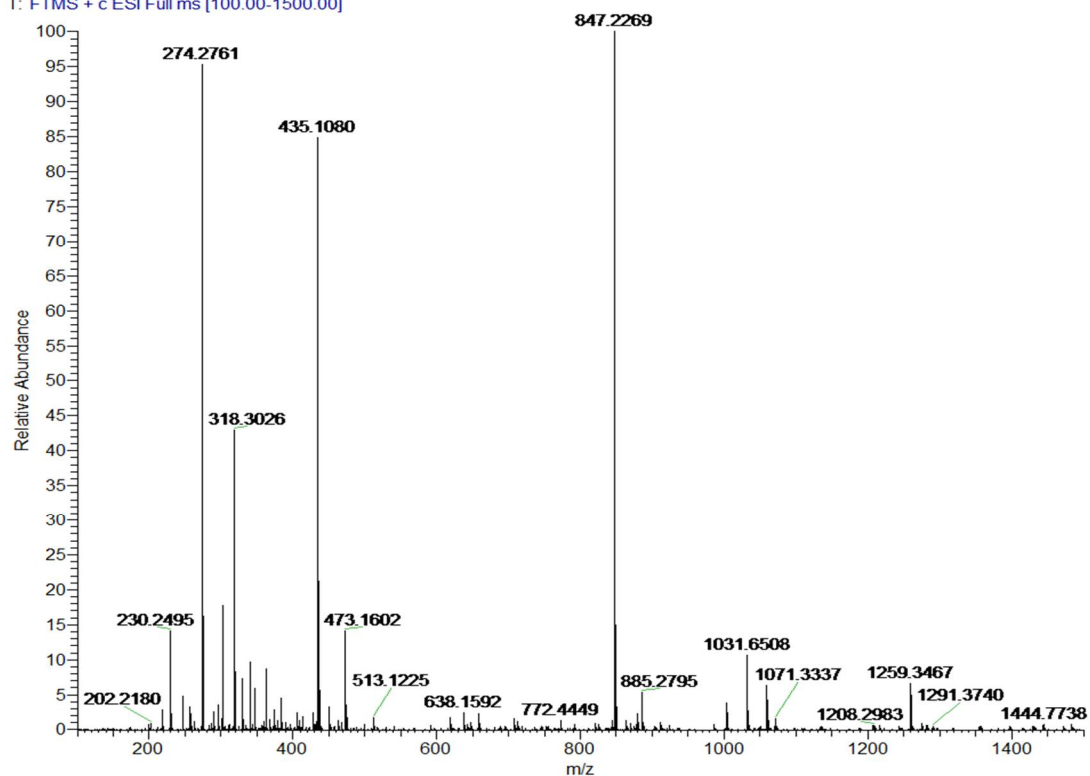

HRMS spectrum of compound Zey-B2

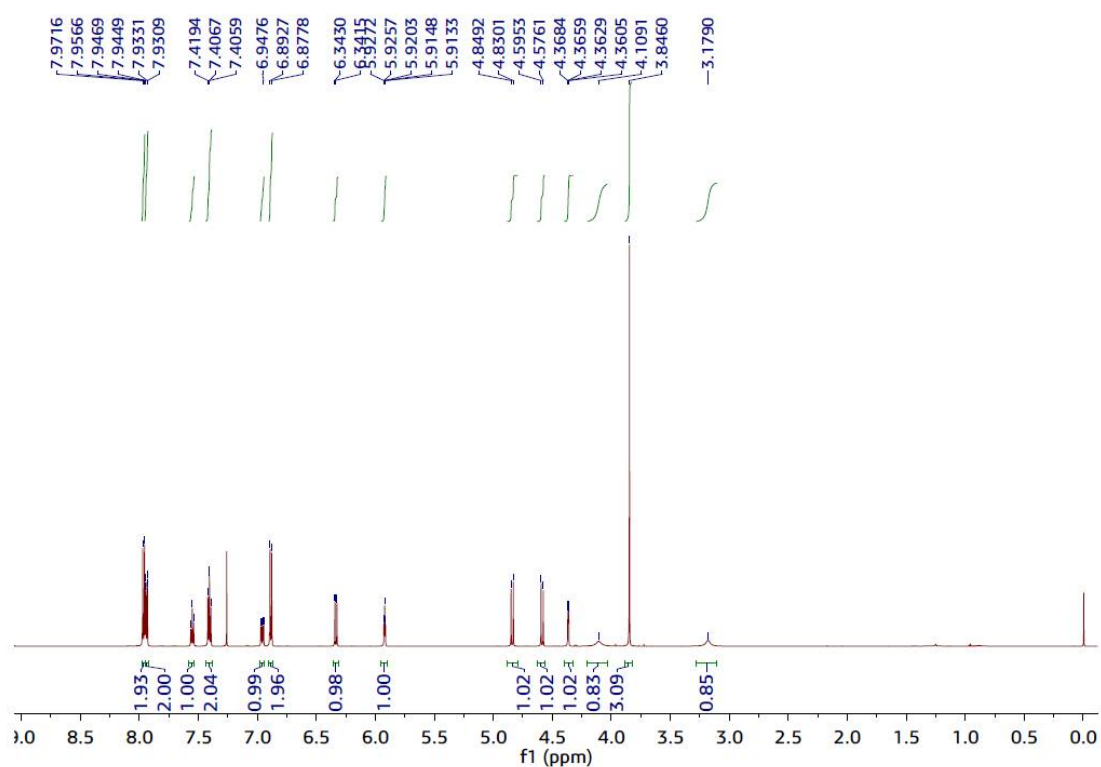

<sup>1</sup>H NMR spectrum of compound Zey-B2

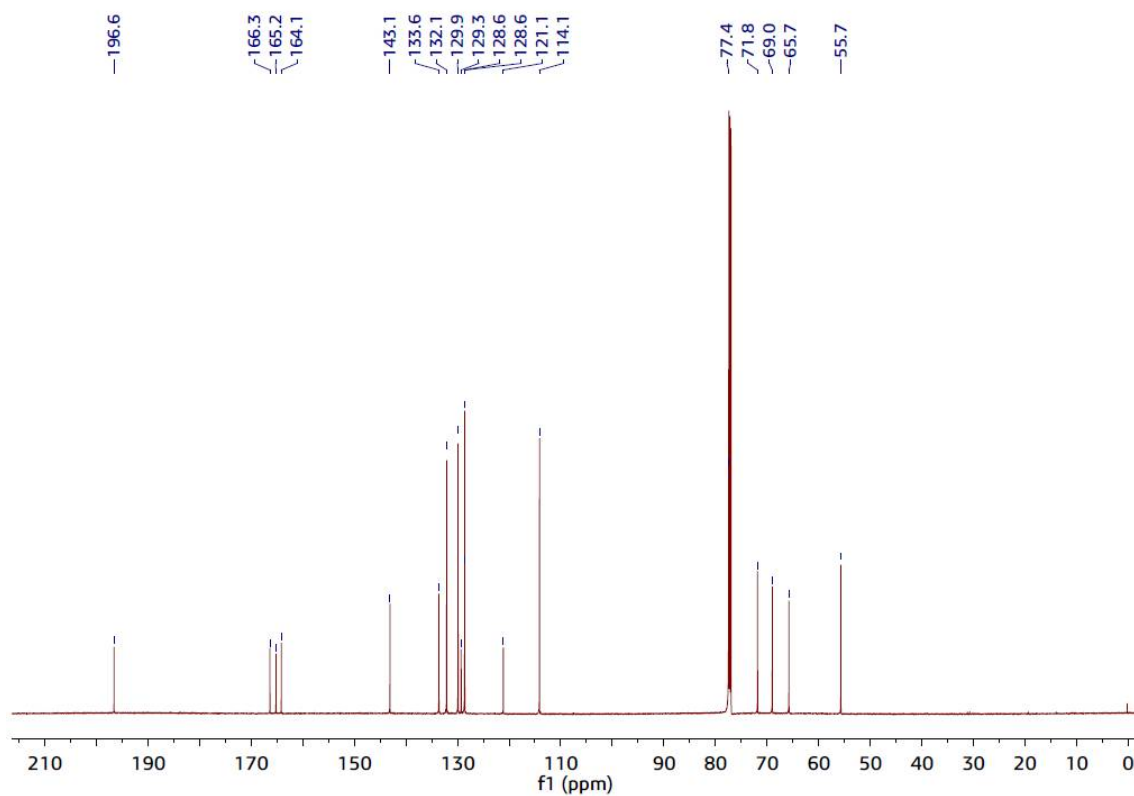

$^{13}\text{C}$ NMR spectrum of compound Zey-B2

ZEY 3-5 F\_190305132555 #1 RT: 0.00 AV: 1 NL: 2.05E8  
T: FTMS + c ESI Full ms [100.00-1500.00]

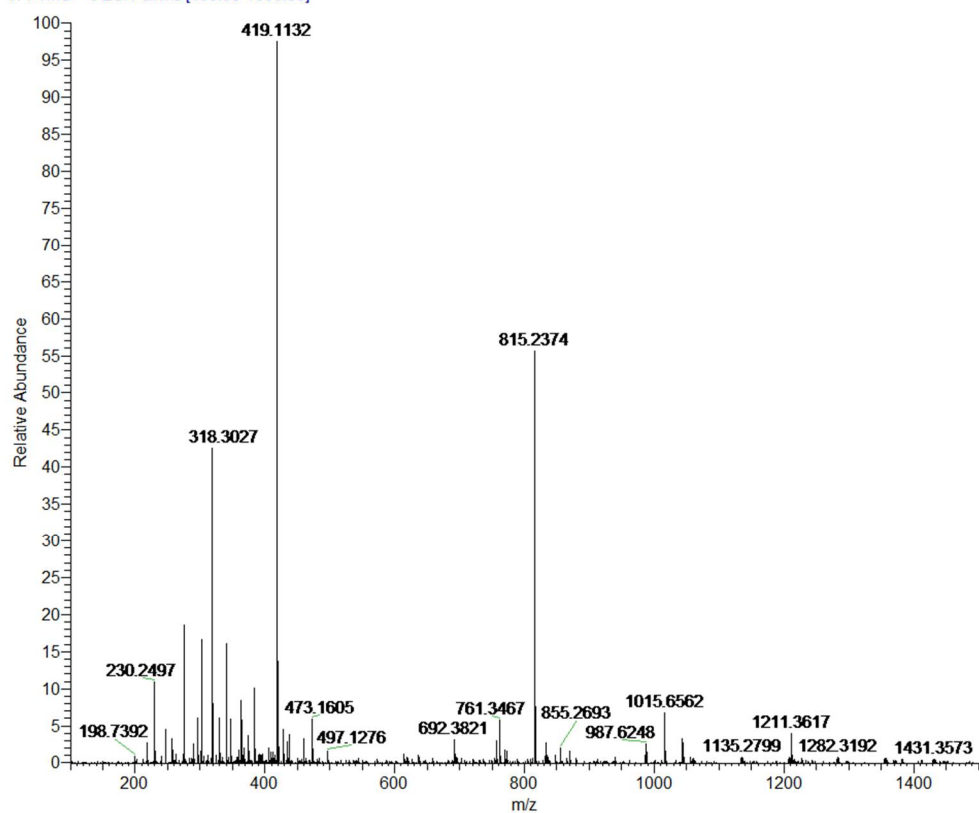

HRMS spectrum of compound Zey-B3

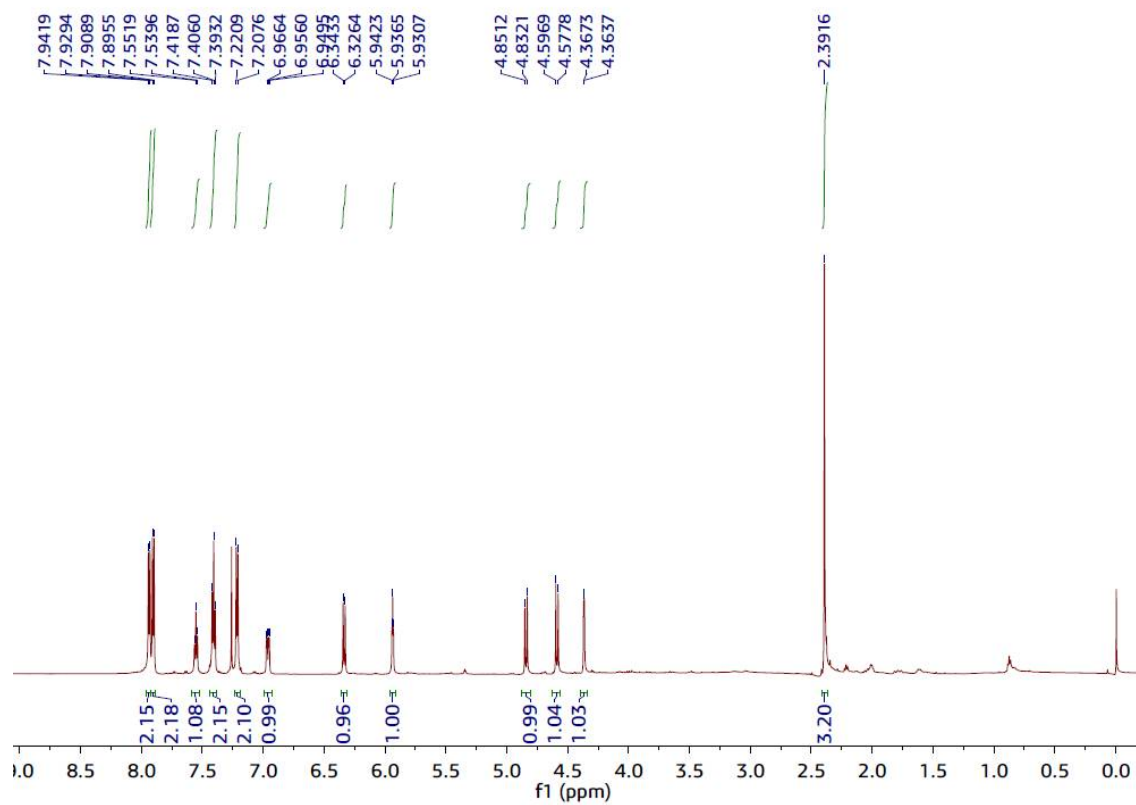

<sup>1</sup>H NMR spectrum of compound Zey-B3

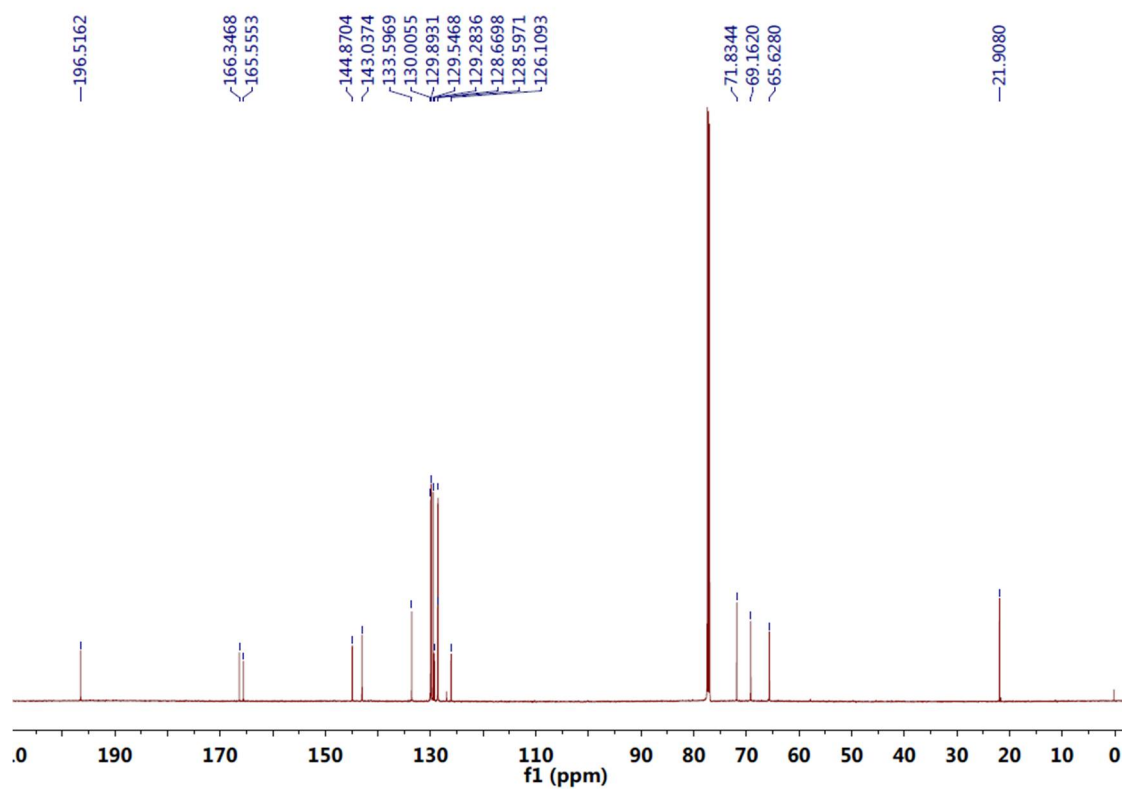

<sup>13</sup>C NMR spectrum of compound Zey-B3

ZEY 3-3A F\_190305132555 #1 RT: 0.00 AV: 1 NL: 2.34E8  
T: FTMS + c ESI Full ms [100.00-1500.00]

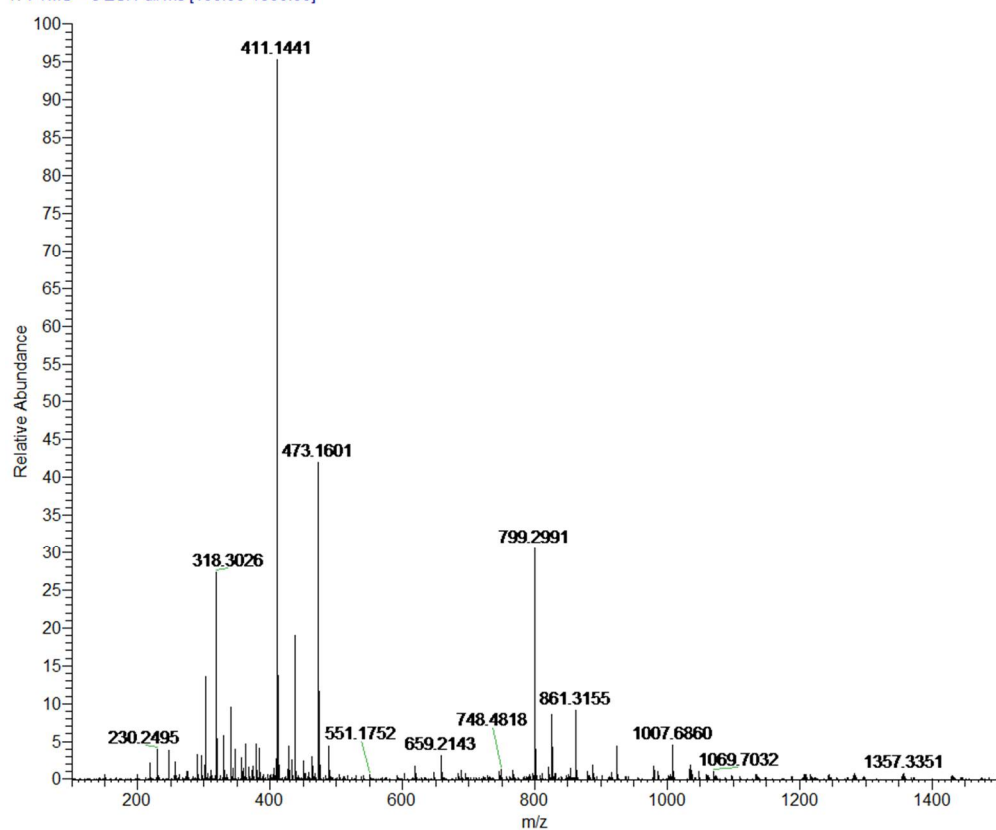

HRMS spectrum of compound Zey-B4

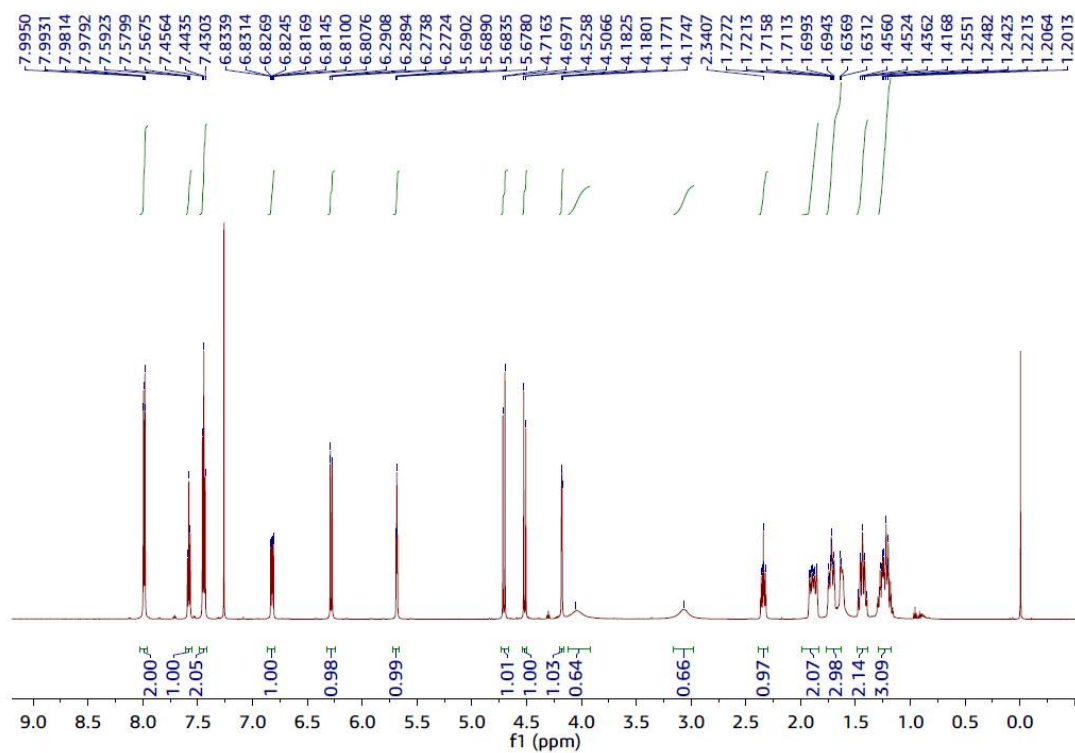

<sup>1</sup>H NMR spectrum of compound Zey-B4

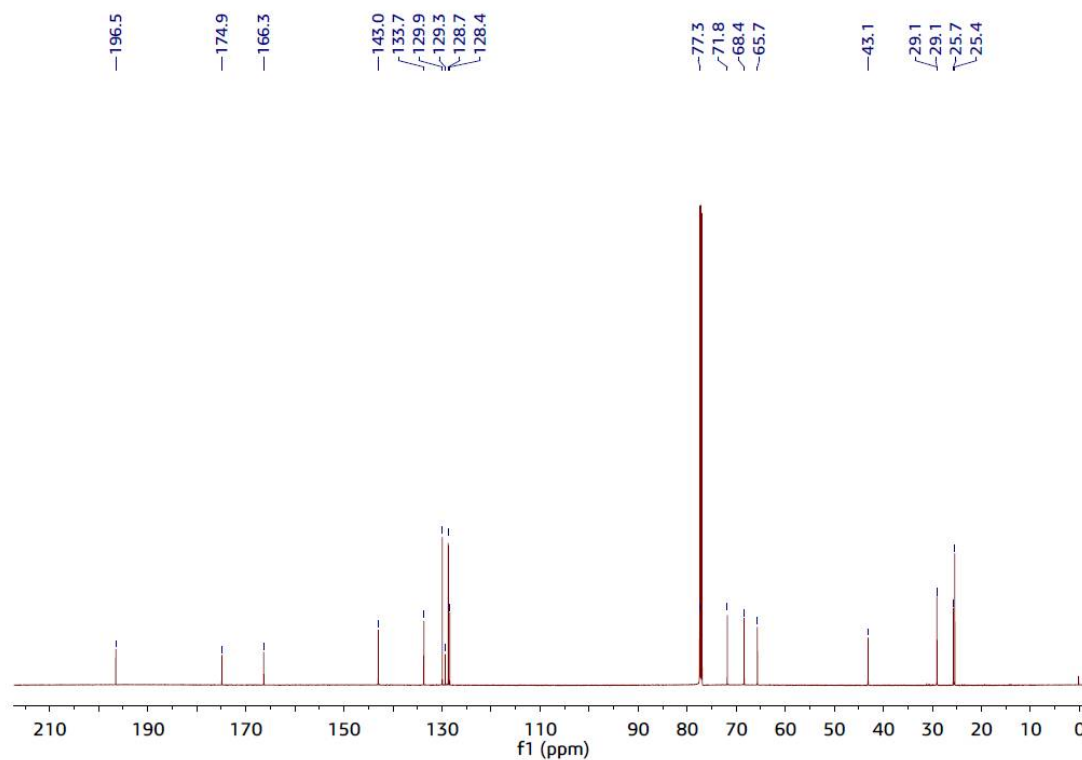

$^{13}\text{C}$ NMR spectrum of compound Zey-B4

ZEY 3-1\_190305132555 #1 RT: 0.00 AV: 1 NL: 9.18E6  
T: ITMS + c ESI Full ms [100.00-1500.00]

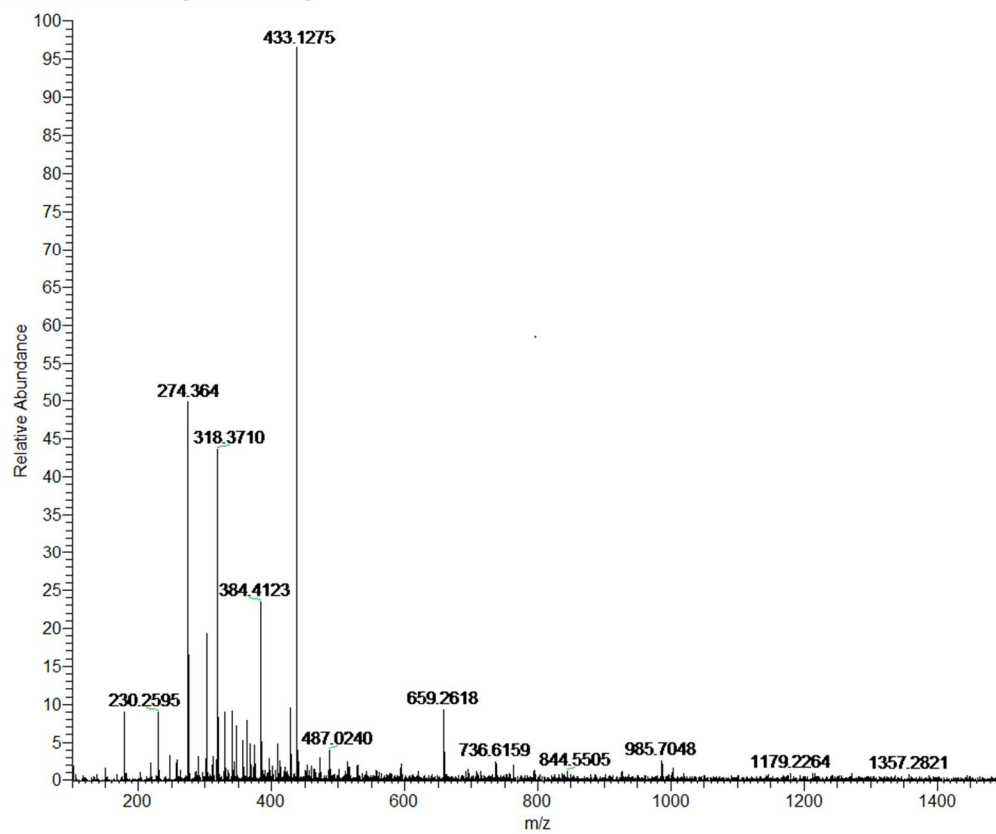

HRMS spectrum of compound Zey-B5

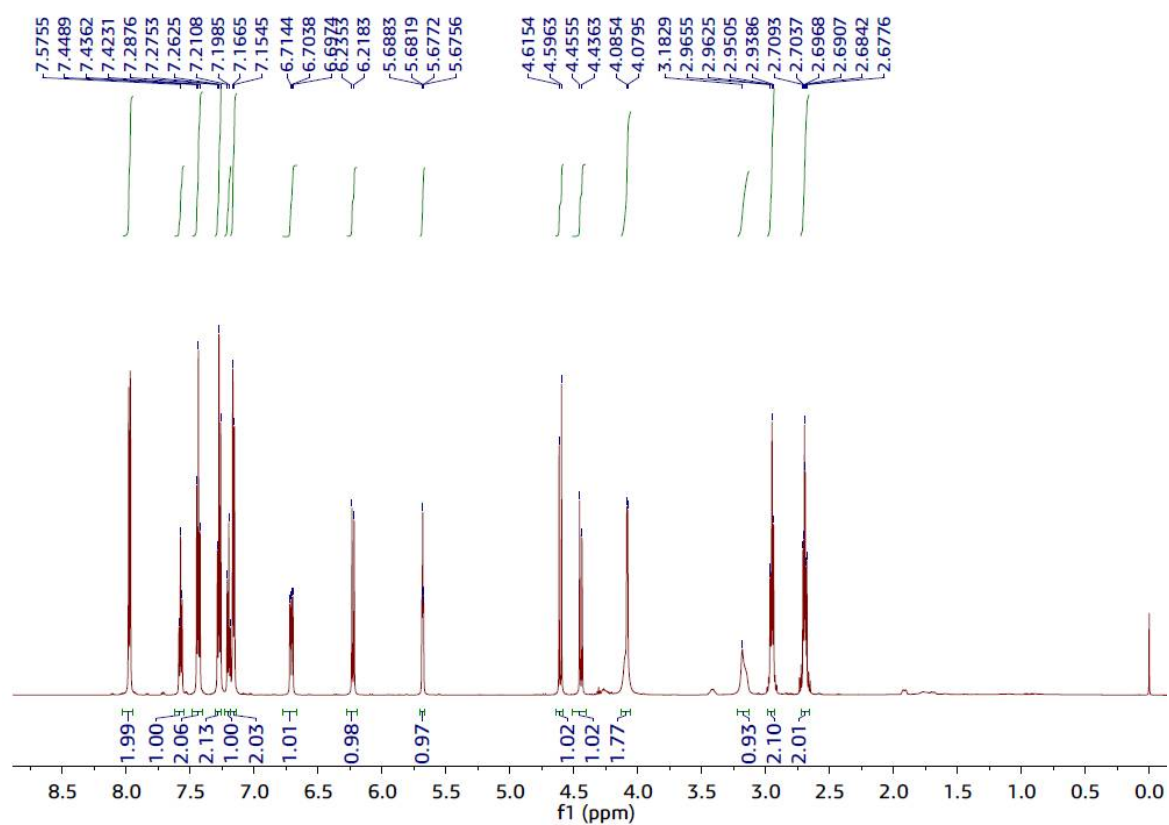

<sup>1</sup>H NMR spectrum of compound Zey-B5

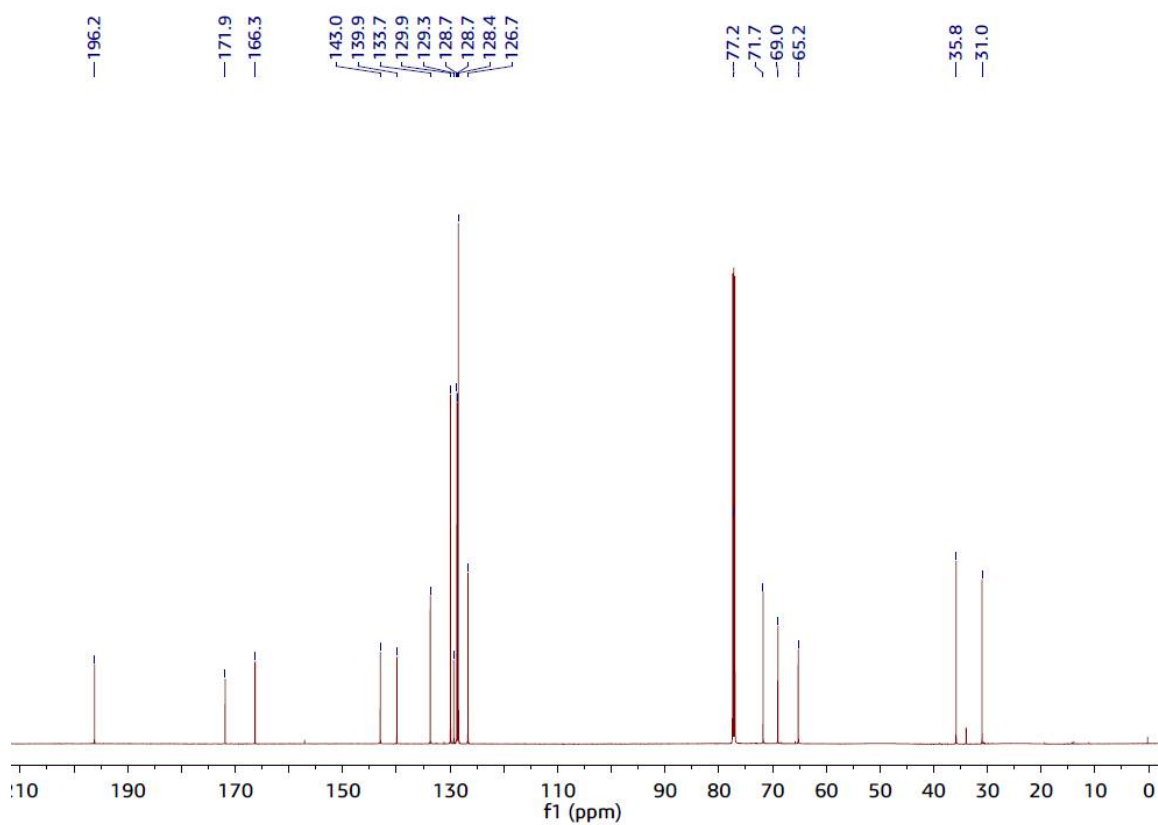

<sup>13</sup>C NMR spectrum of compound Zey-B5



ZEY 3-6 F\_190305132555 #1 RT: 0.00 AV: 1 NL: 9.28E7  
T: FTMS + c ESI Full ms [100.00-1500.00]

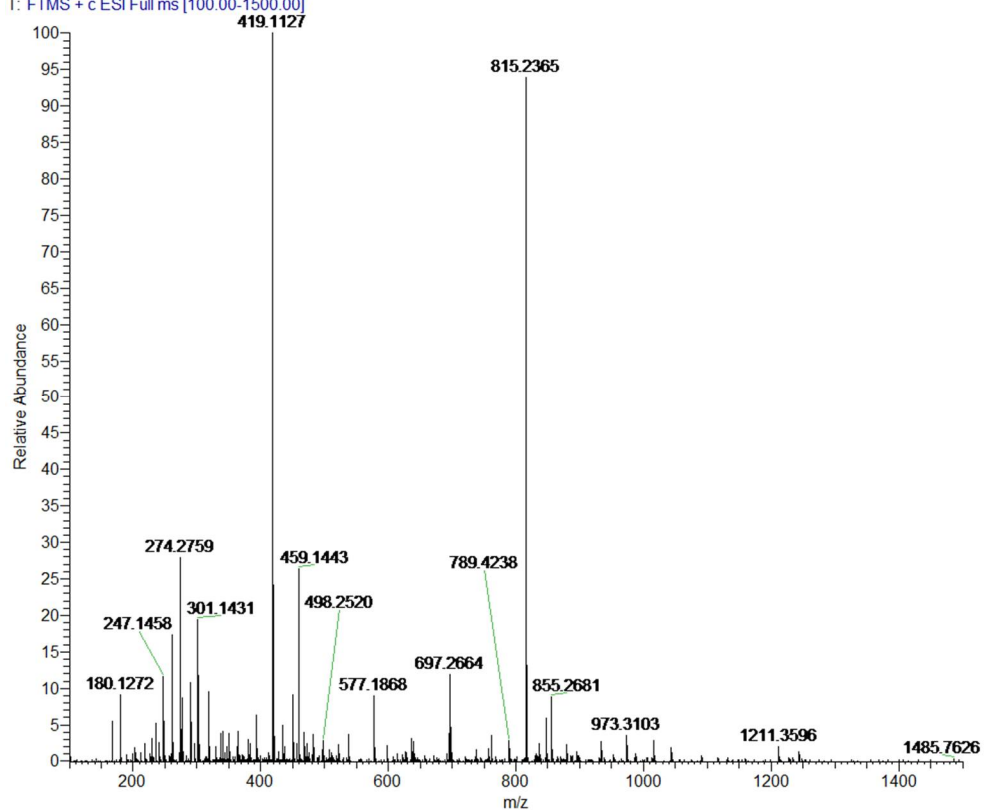

HRMS spectrum of compound Zey-B6

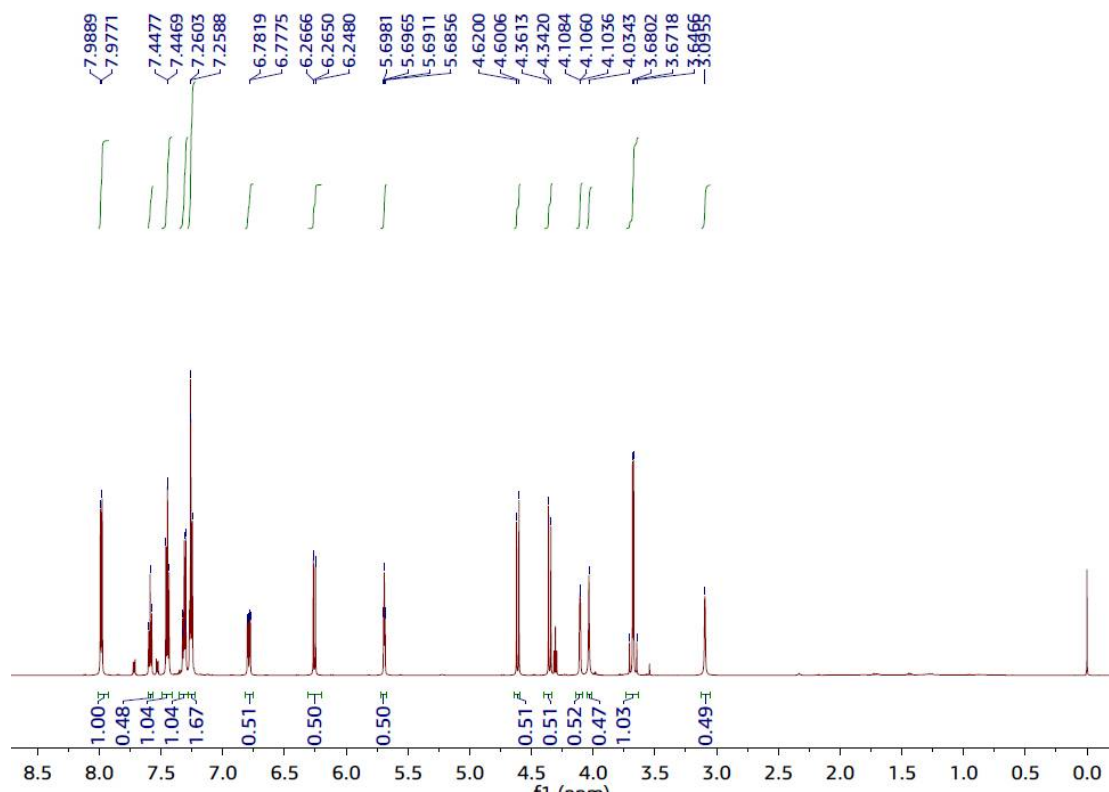

<sup>1</sup>H NMR spectrum of compound Zey-B6

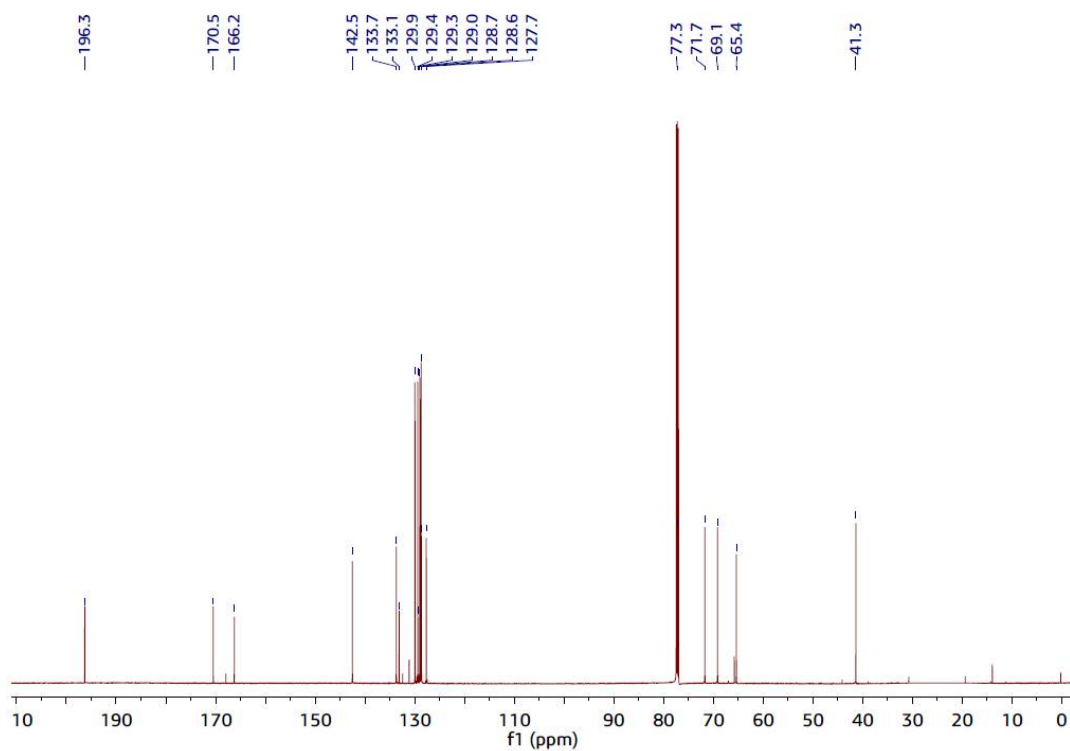

$^{13}\text{C}$ NMR spectrum of compound Zey-B6

YIXIAN B F\_190318103220 #1 RT: 0.01 AV: 1 NL: 2.19E8  
T: FTMS + c ESI Full ms [50.00-1000.00]

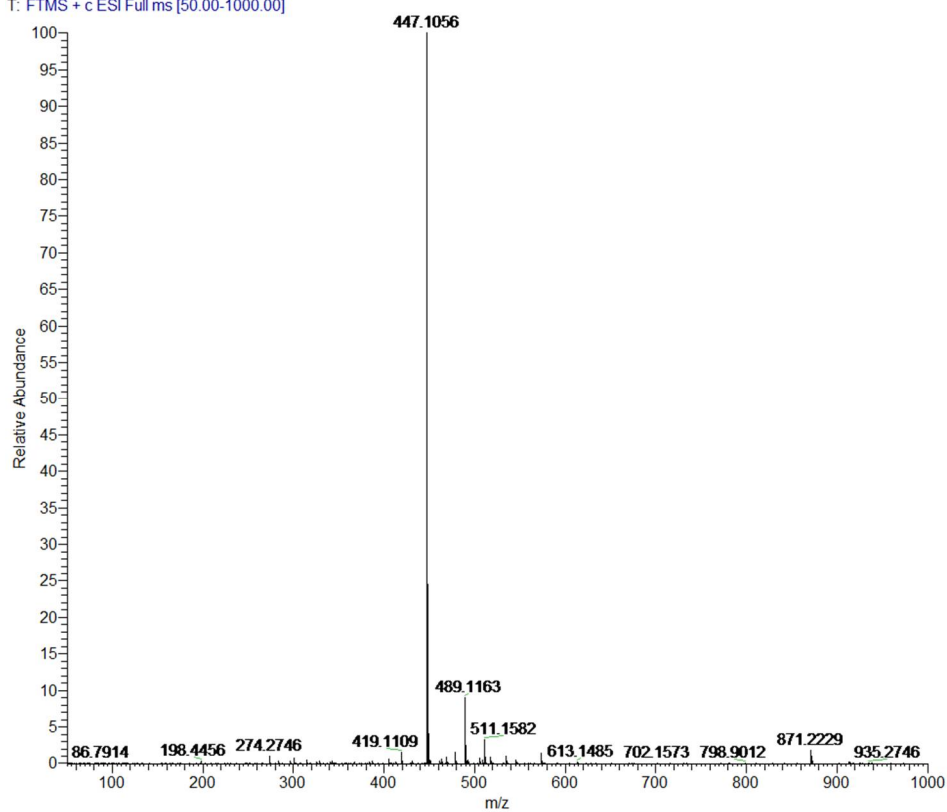

HRMS spectrum of compound Zey-C1

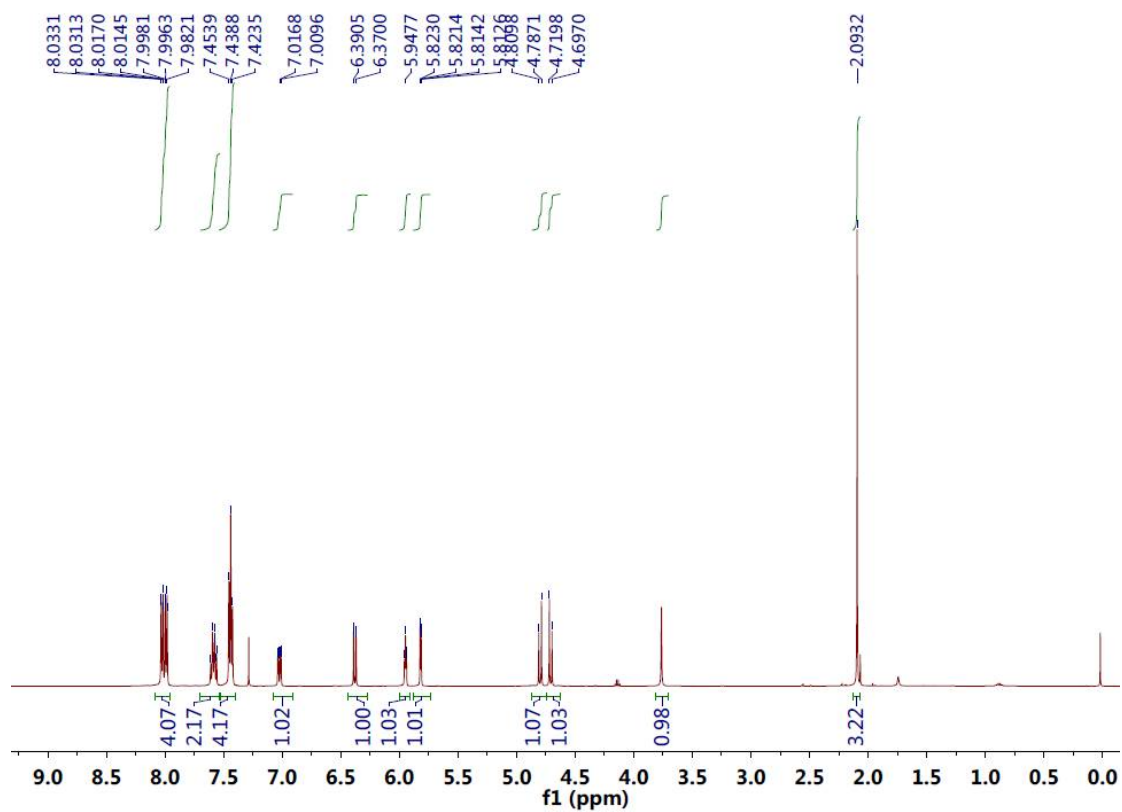

<sup>1</sup>H NMR spectrum of compound Zey-C1

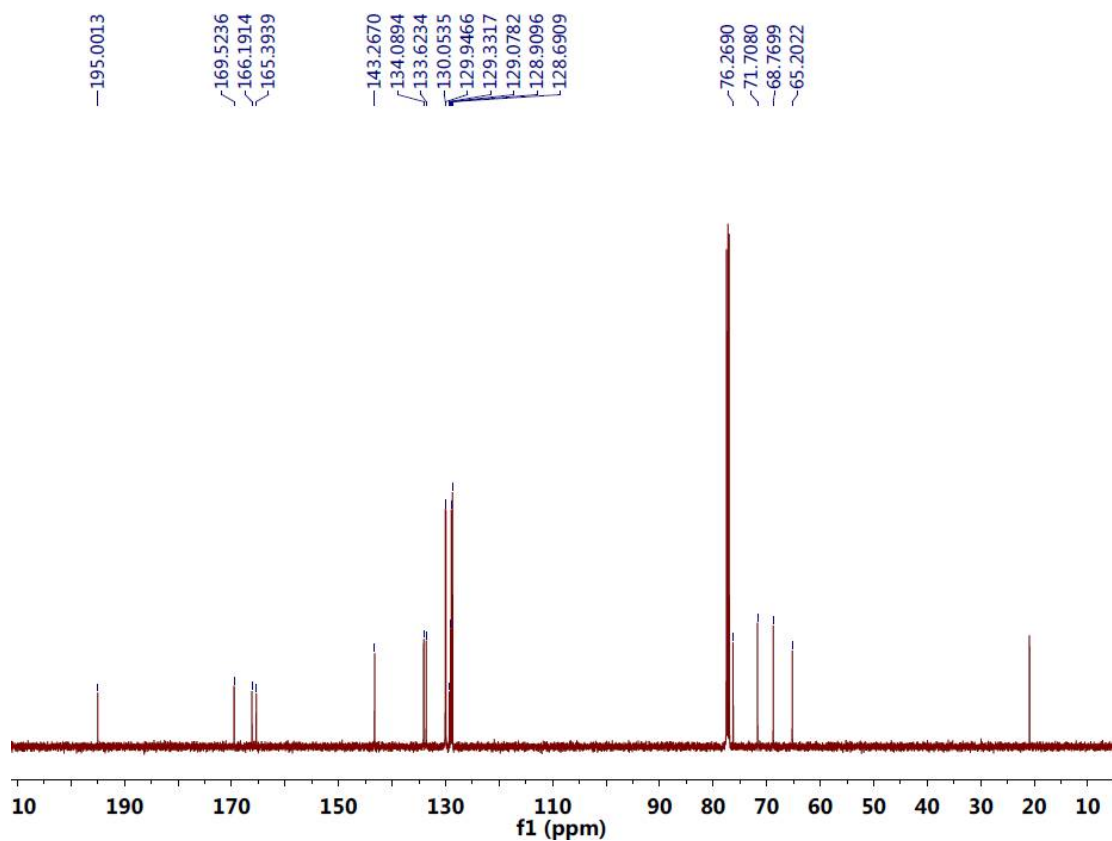

<sup>13</sup>C NMR spectrum of compound Zey-C1

YIXIAN A.F. 190318103220 #1 RT: 0.01 AV: 1 NL: 2.34E8  
T: FTMS + c ESI Full ms [50.00-1000.00]

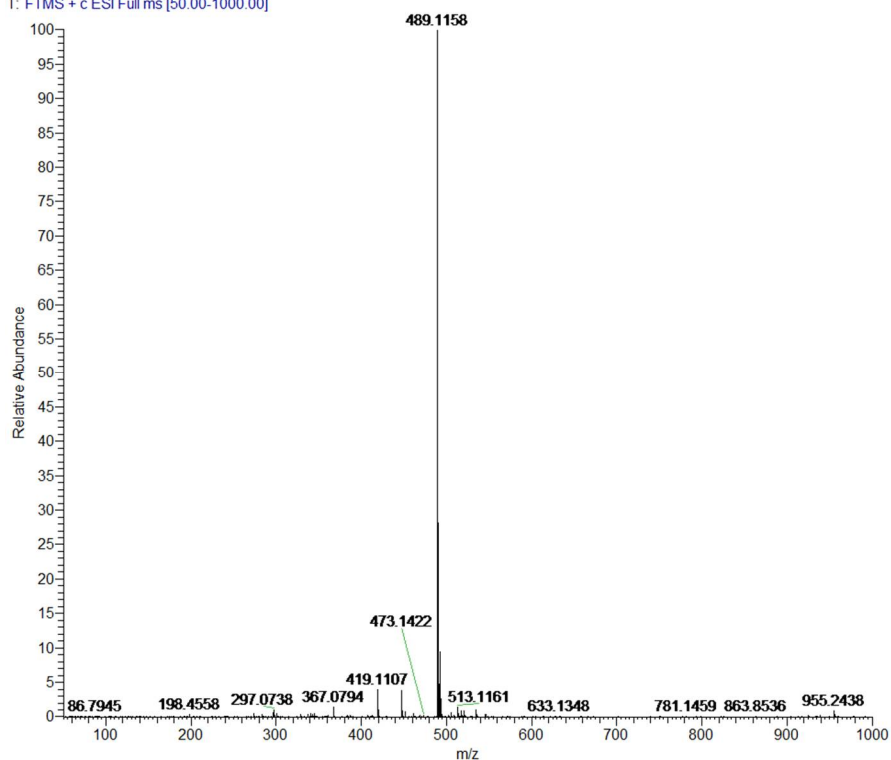

HRMS spectrum of compound Zey-C2

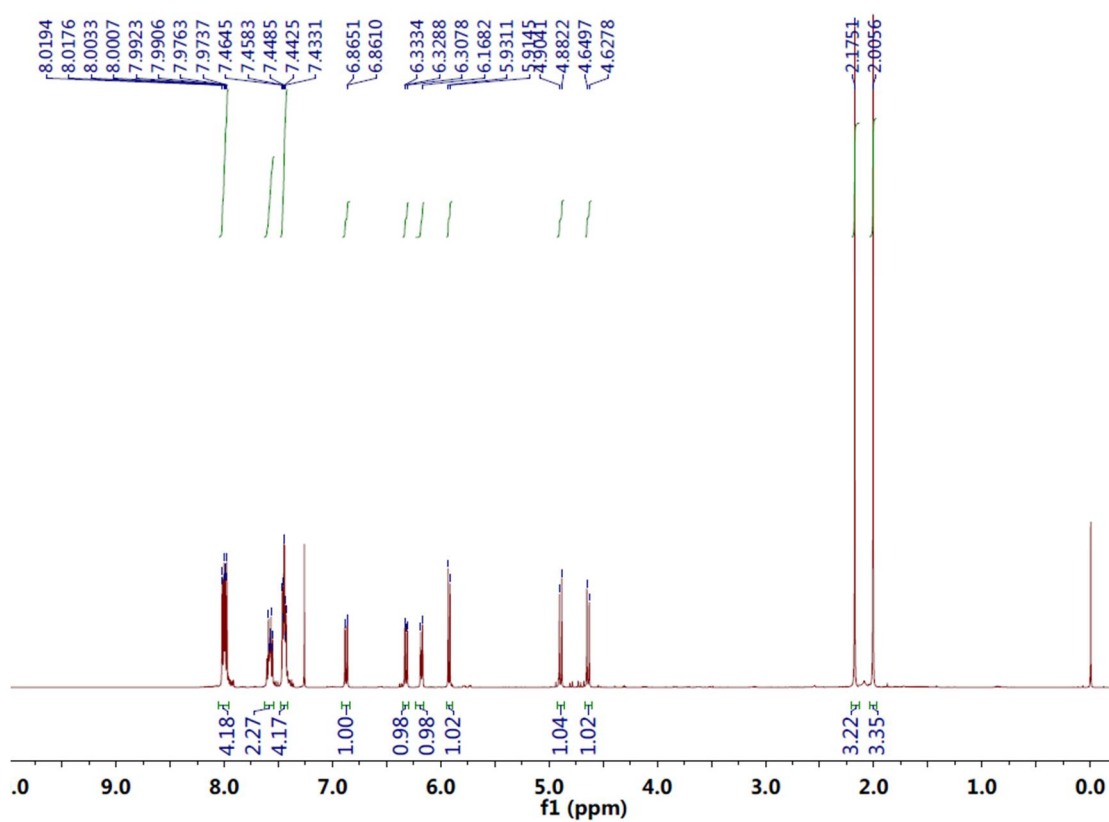

<sup>1</sup>H NMR spectrum of compound Zey-C2

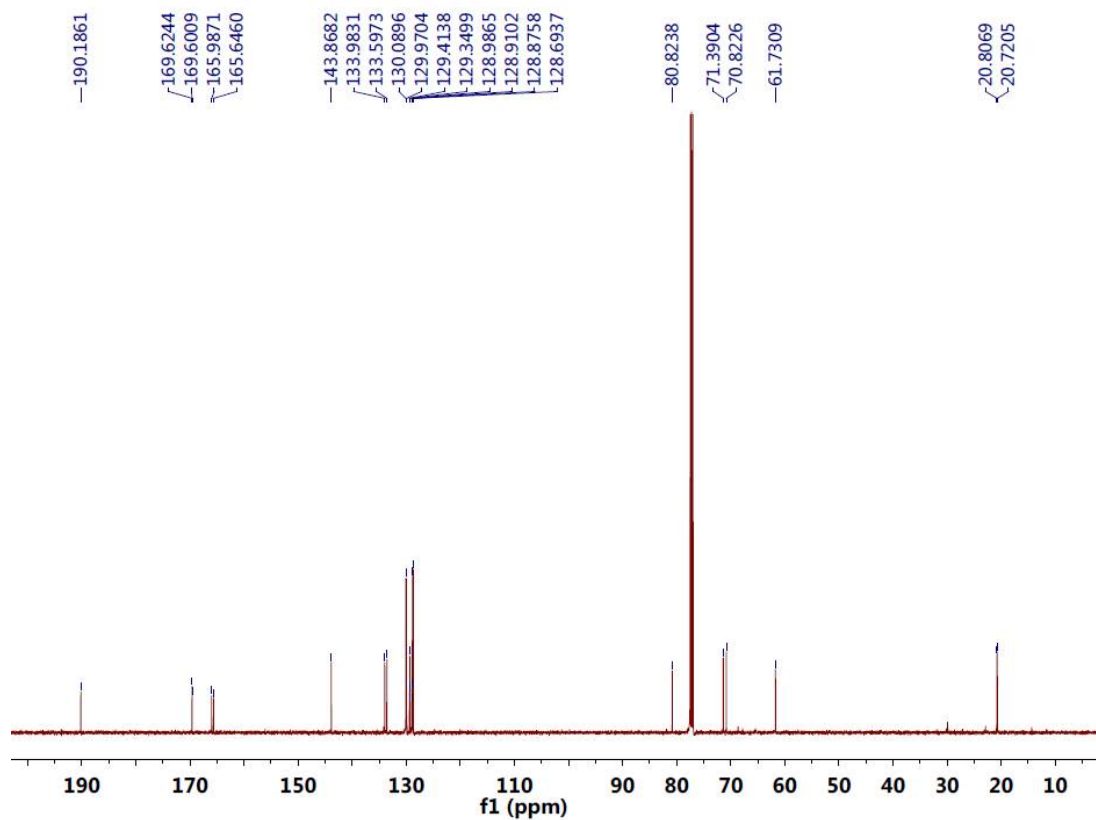

<sup>13</sup>C NMR spectrum of compound Zey-C2

BING\_2\_190318103220 #1 RT: 0.00 AV: 1 NL: 1.27E7  
T: ITMS + c ESI Full ms [50.00-1000.00]

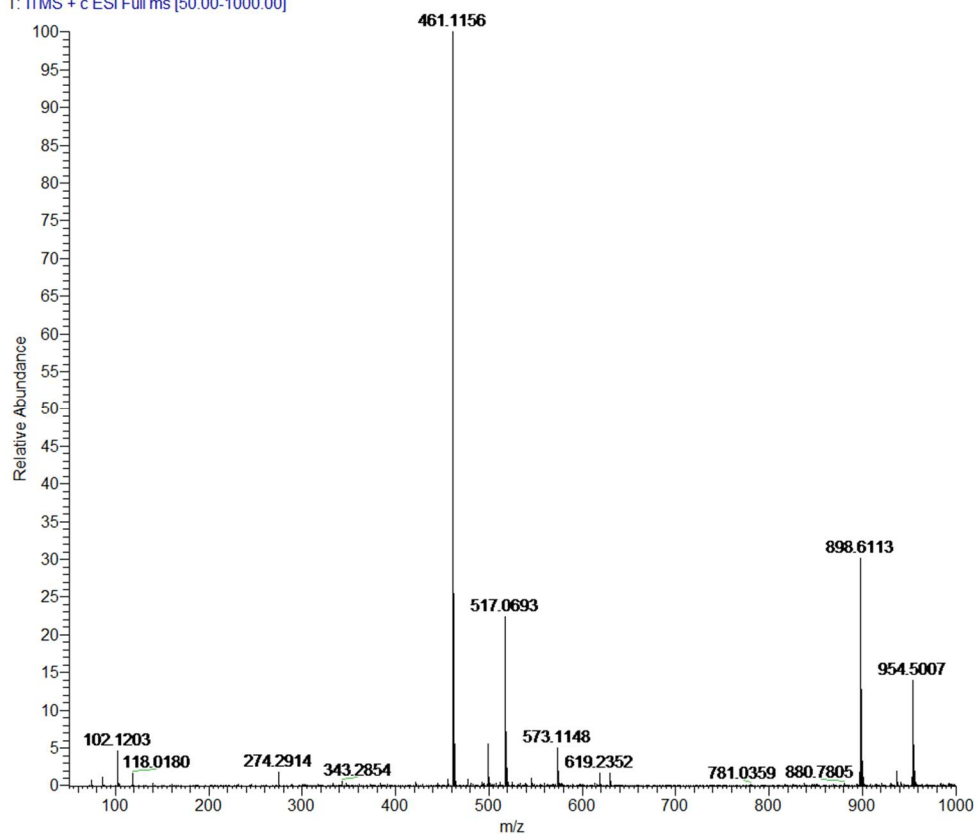

HRMS spectrum of compound Zey-C3

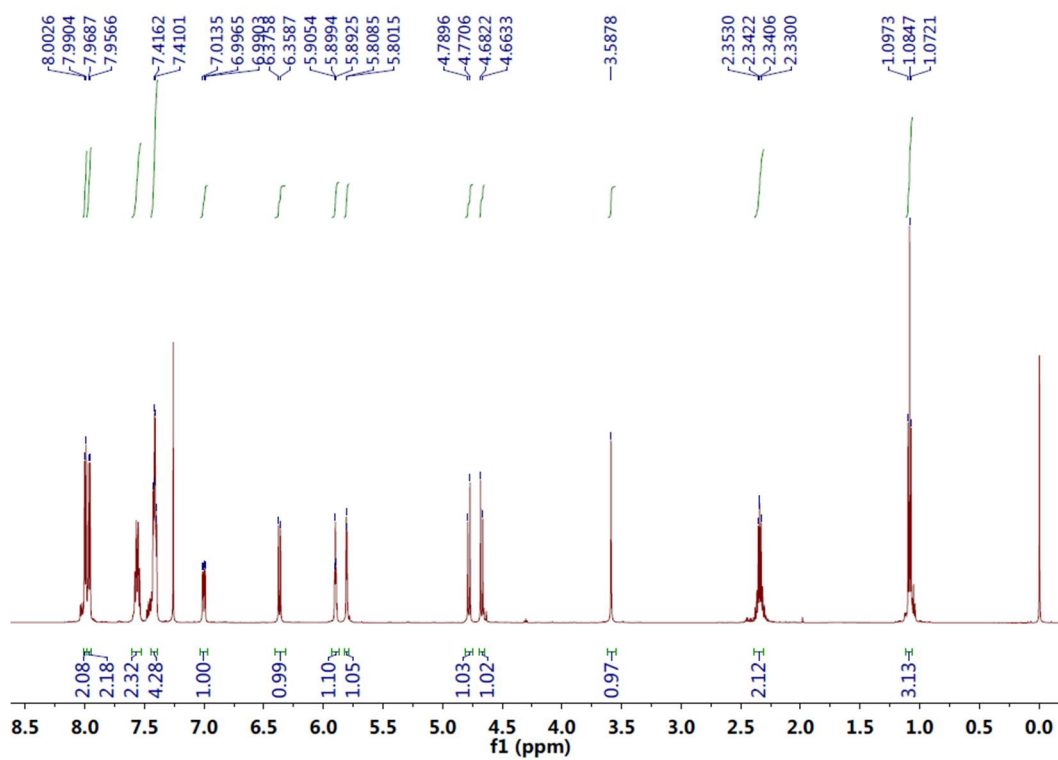

<sup>1</sup>H NMR spectrum of compound Zey-C3

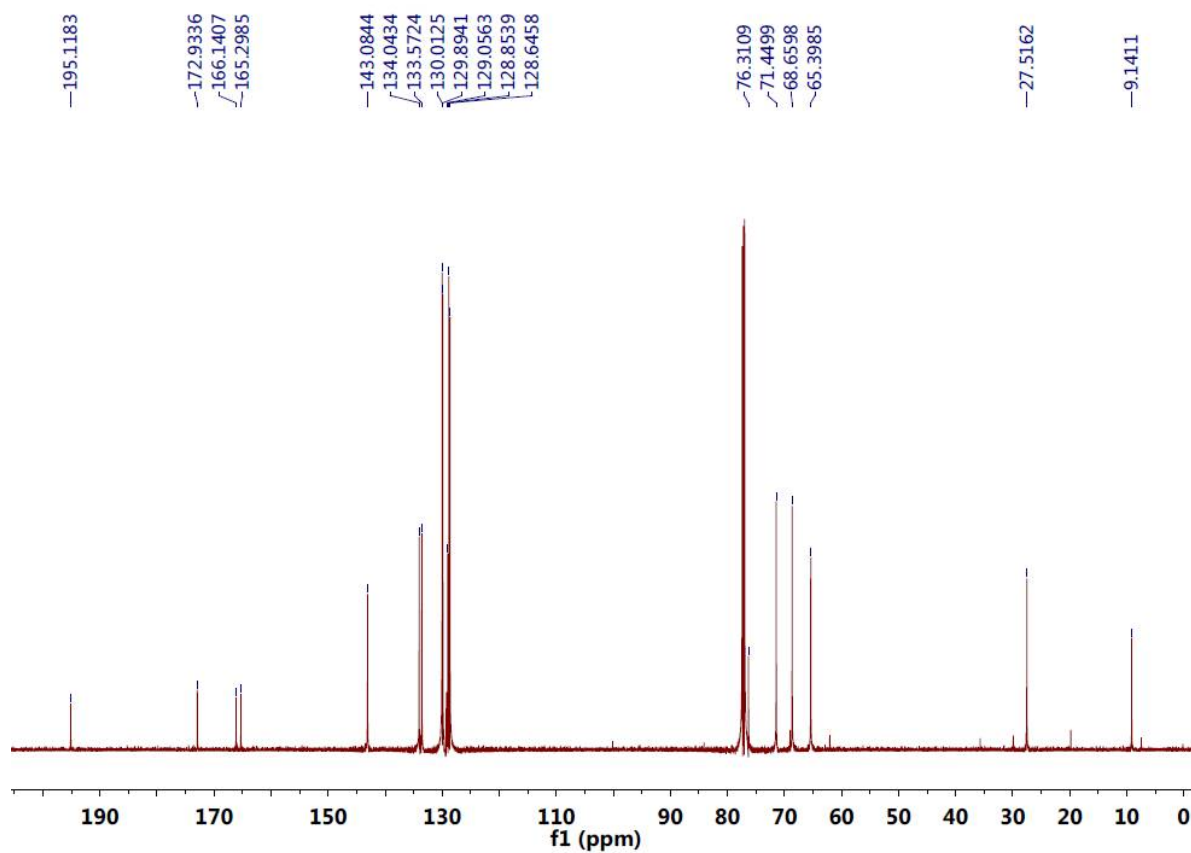

<sup>13</sup>C NMR spectrum of compound Zey-C3

BING 1 F\_190318103220 #1 RT: 0.00 AV: 1 NL: 3.15E7  
T: FTMS + c ESI Full ms [50.00-1000.00]

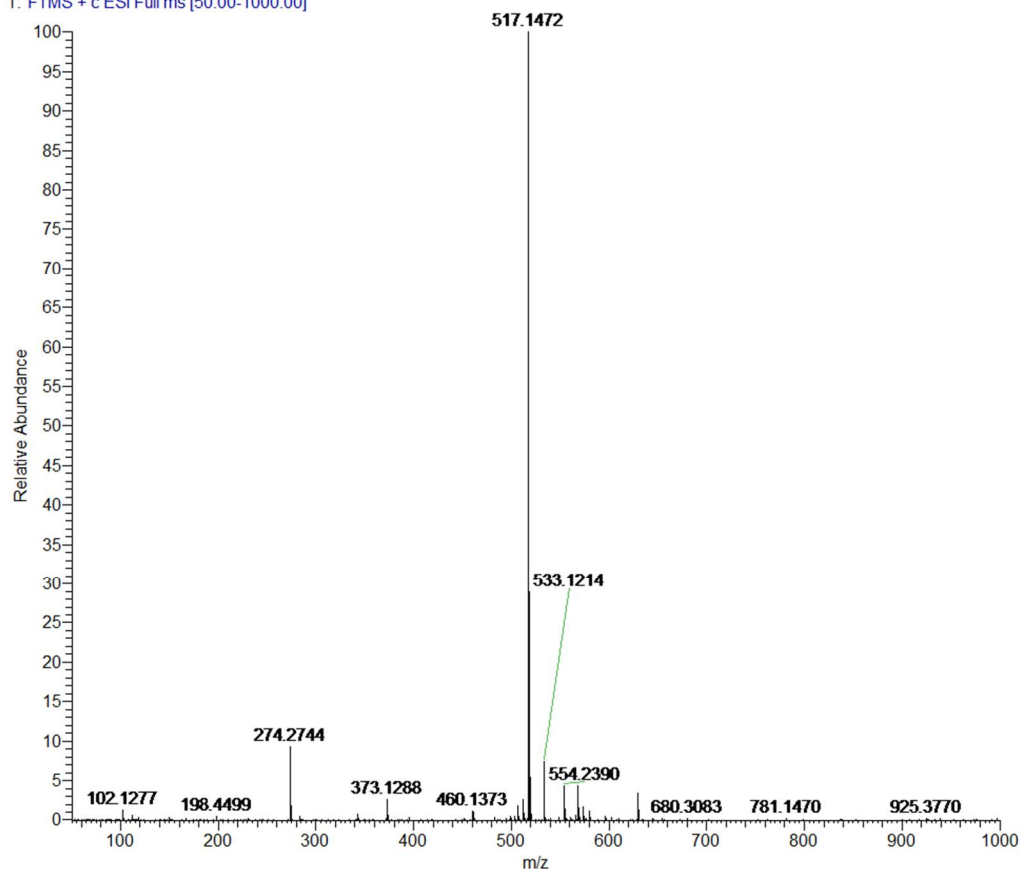

HRMS spectrum of compound Zey-C4

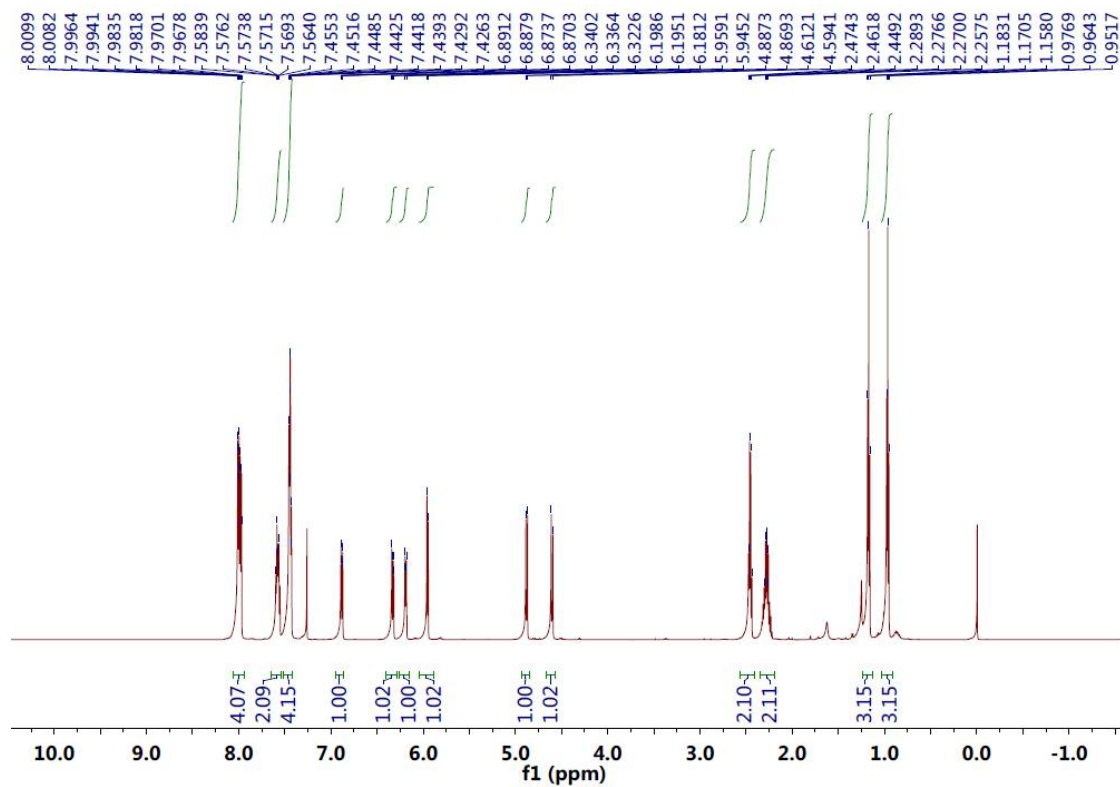

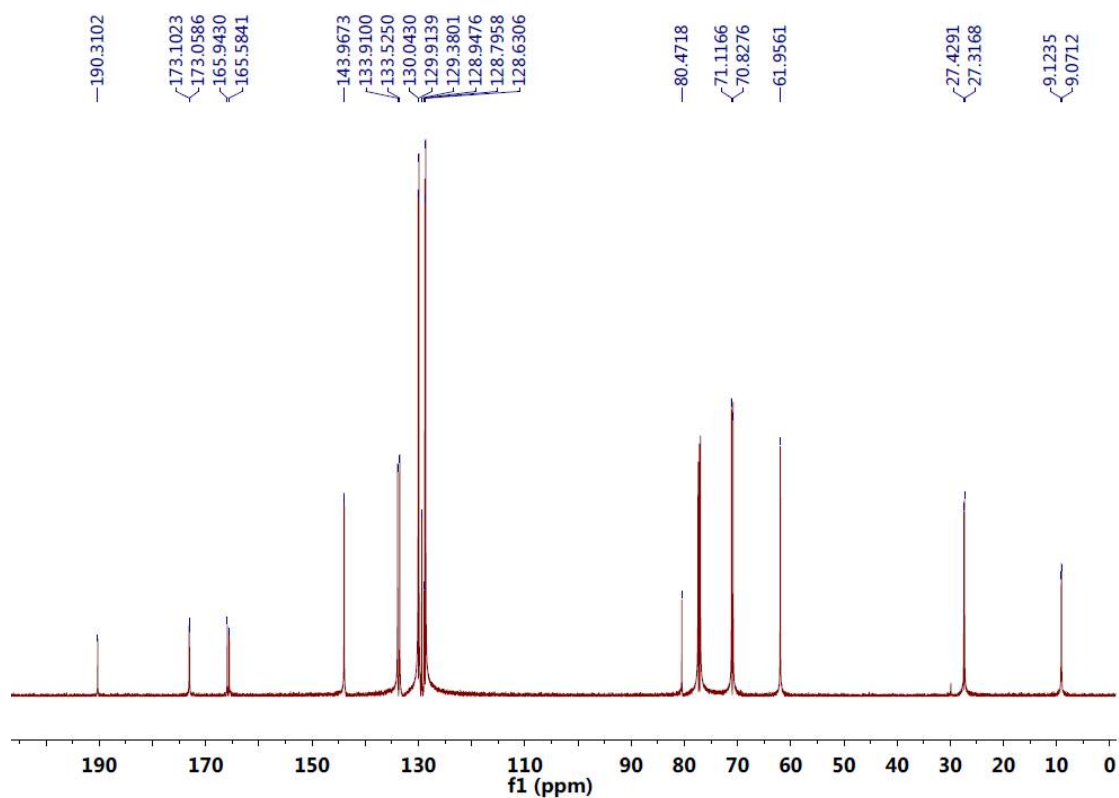

$^{13}\text{C}$  NMR spectrum of compound Zey-C4

BENJIA 2 F\_190318103220 #1 RT: 0.01 AV: 1 NL: 1.80E8  
T: FTMS + c ESI Full ms [50.00-1000.00]

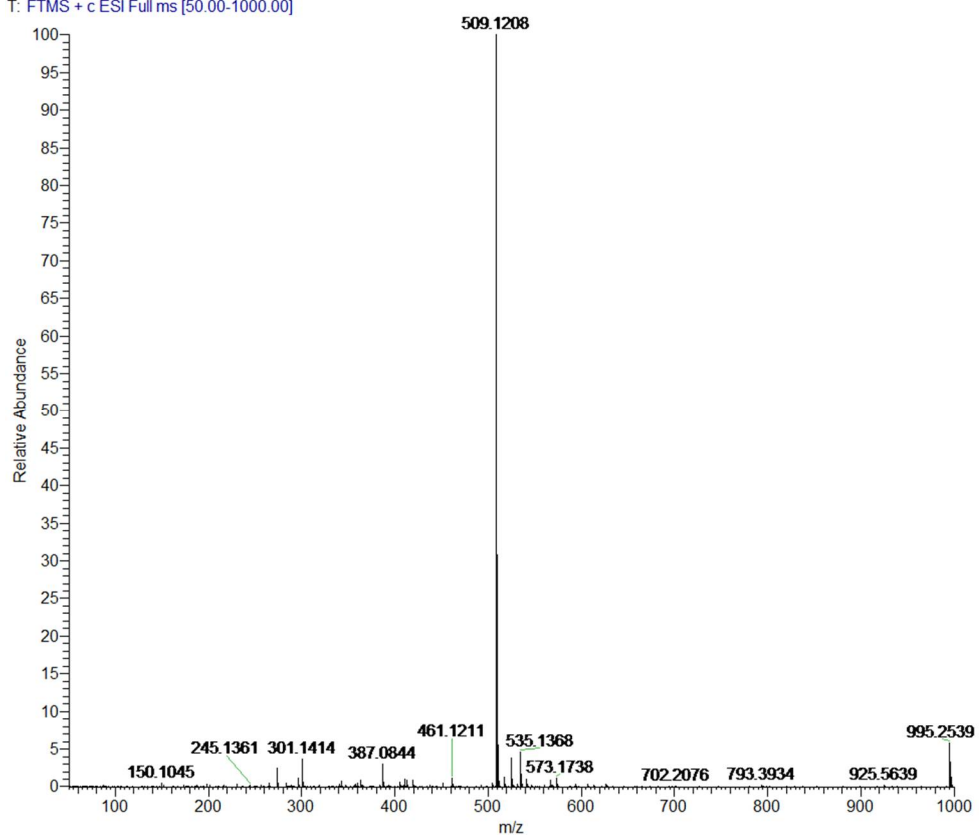

HRMS spectrum of compound Zey-C5



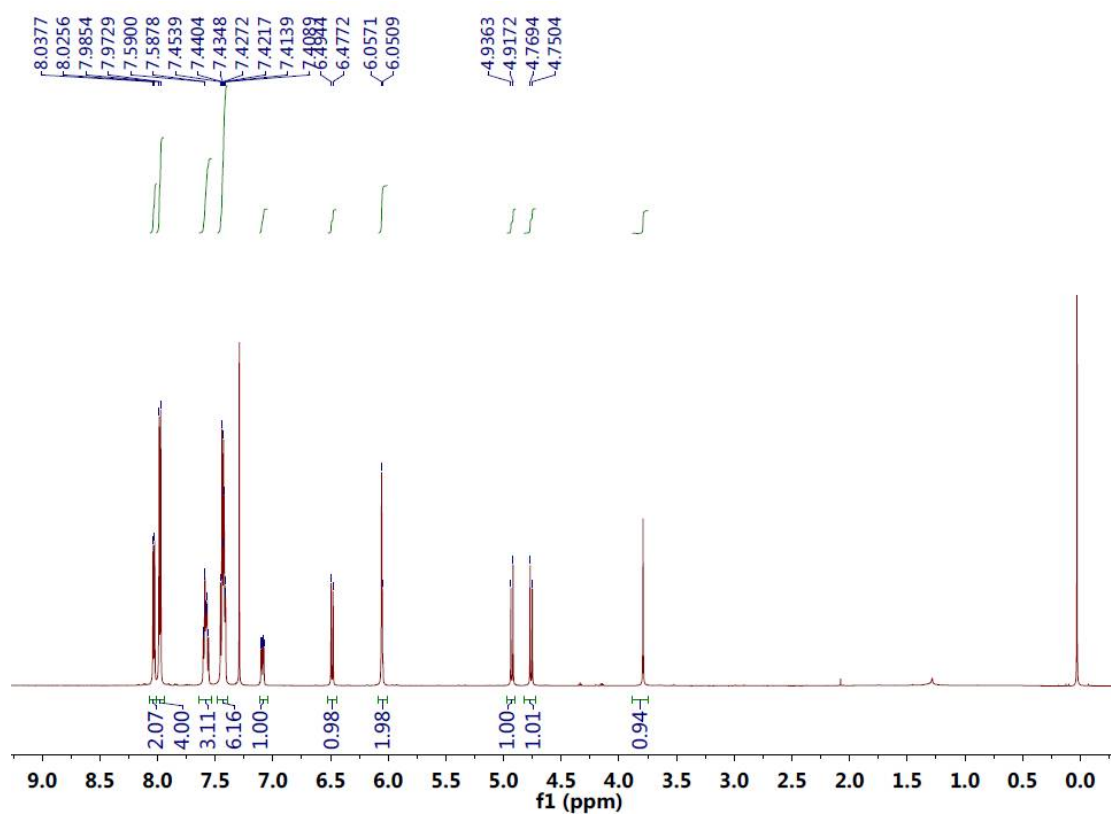

<sup>1</sup>H NMR spectrum of compound Zey-C5

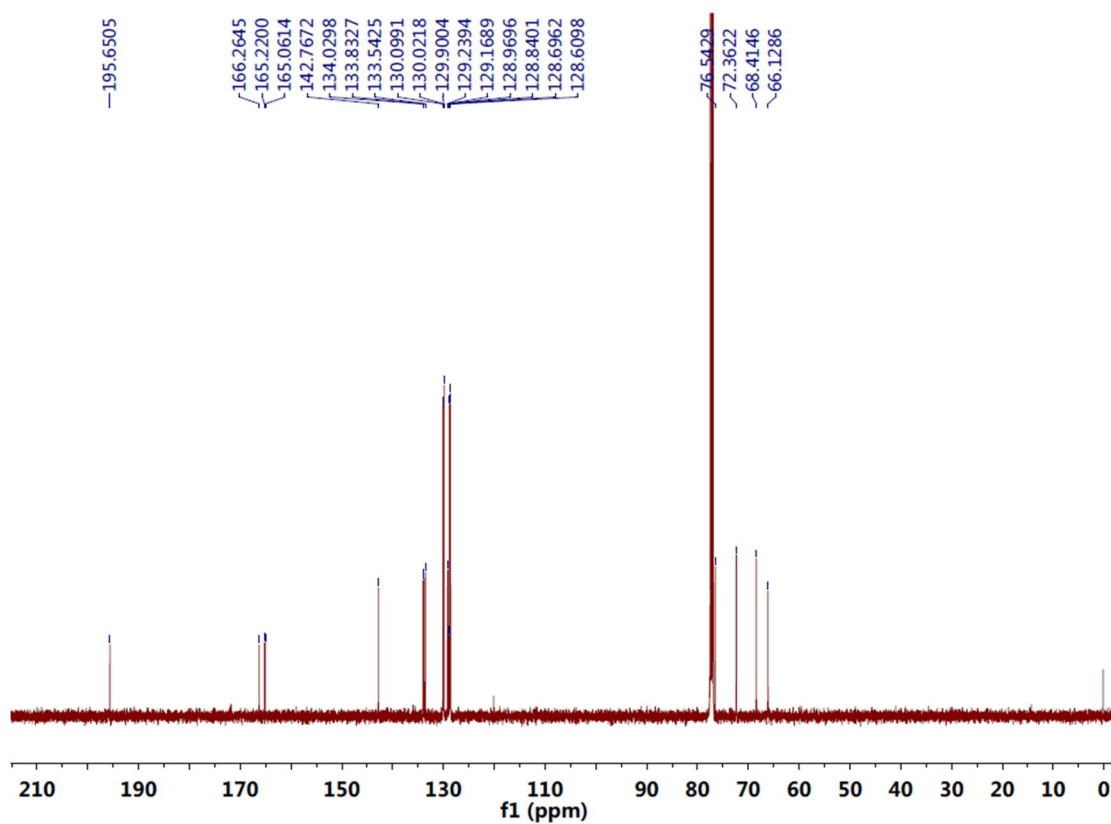

<sup>13</sup>C NMR spectrum of compound Zey-C5

BENJIA 1 F\_190318103220 #1 RT: 0.01 AV: 1 NL: 5.35E7  
T: FTMS + c ESI Full ms [50.00-1000.00]

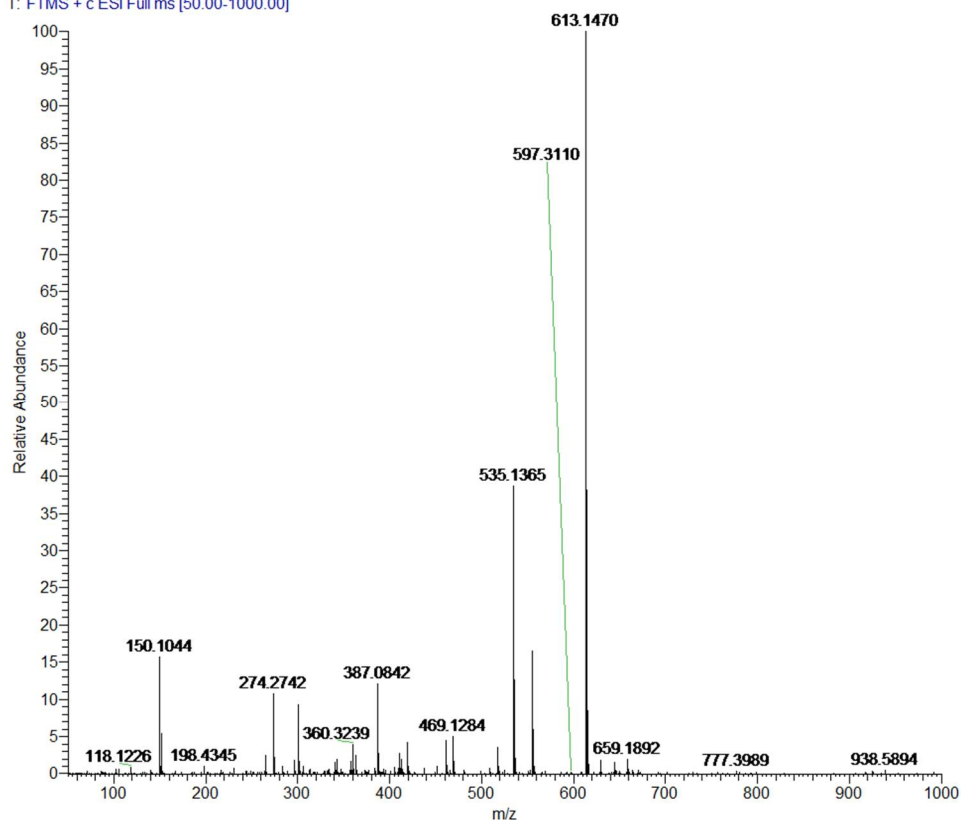

HRMS spectrum of compound Zey-C6

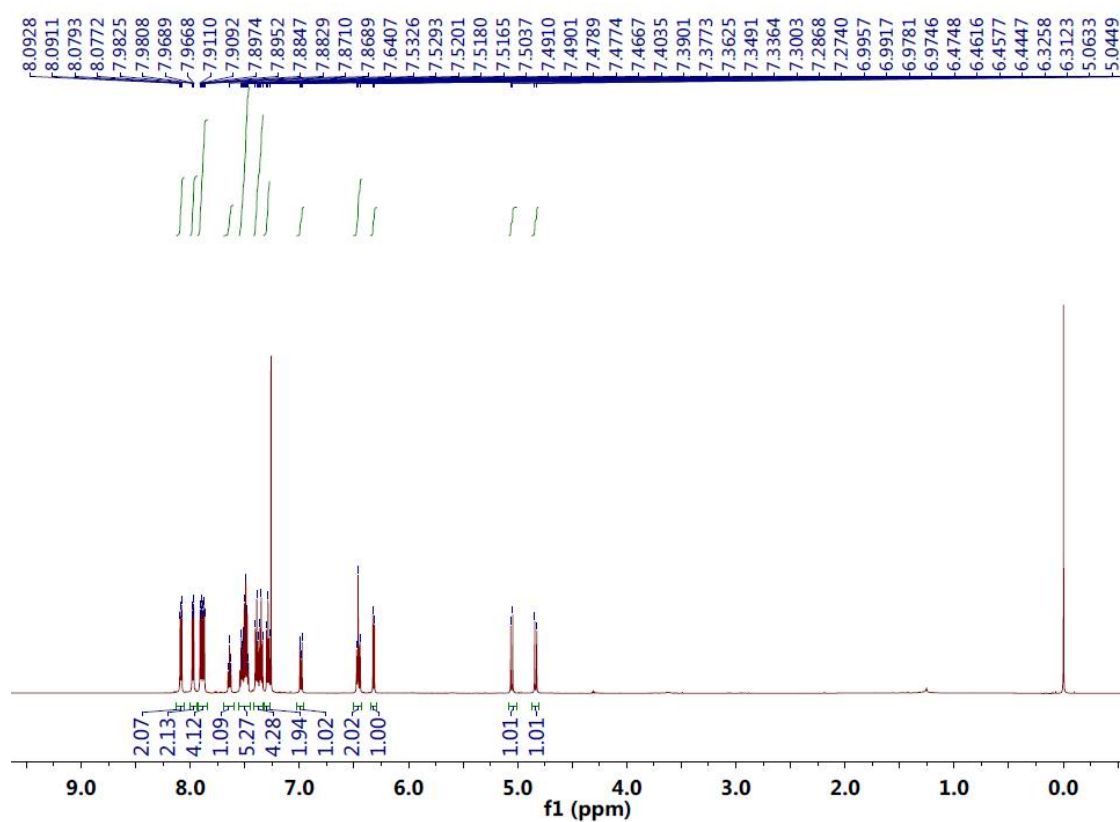

<sup>1</sup>H NMR spectrum of compound Zey-C6

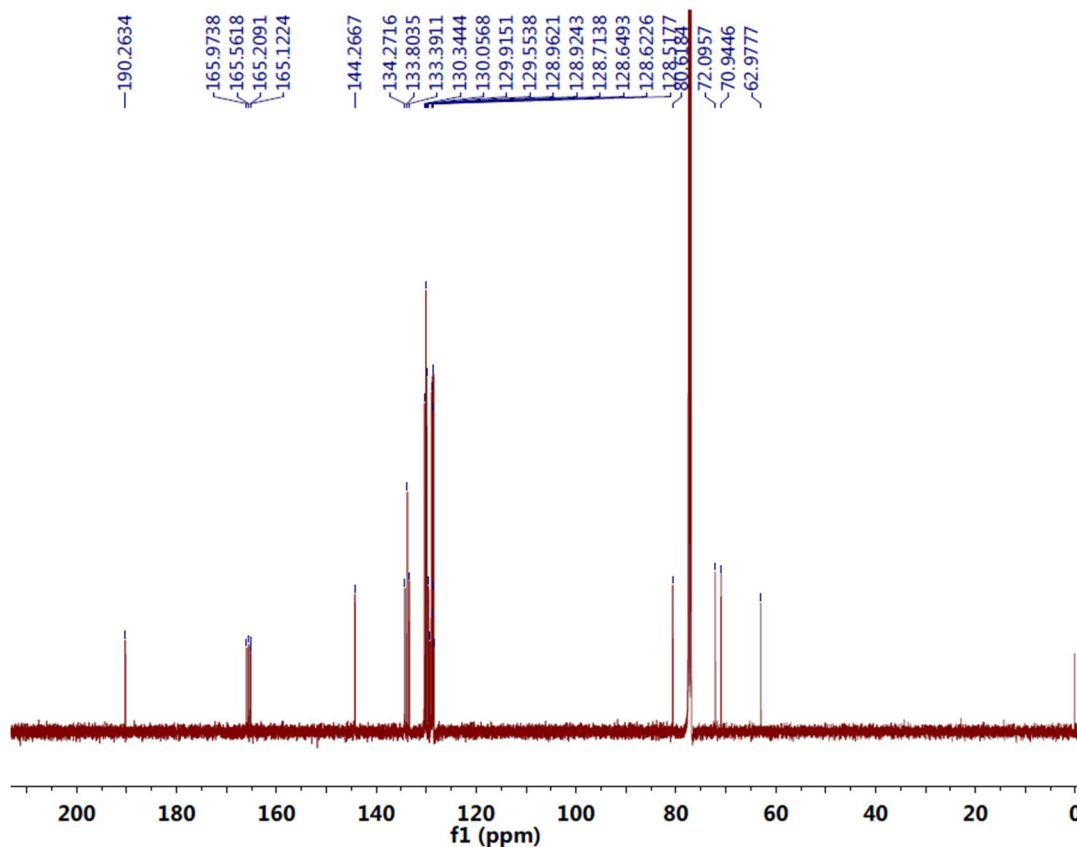

<sup>13</sup>CNMR spectrum of compound Zey-C6

ROUGUI 2 F\_190318103220 #1 RT: 0.01 AV: 1 NL: 4.12E7  
T: FTMS + c ESI Full ms [50.00-1000.00]

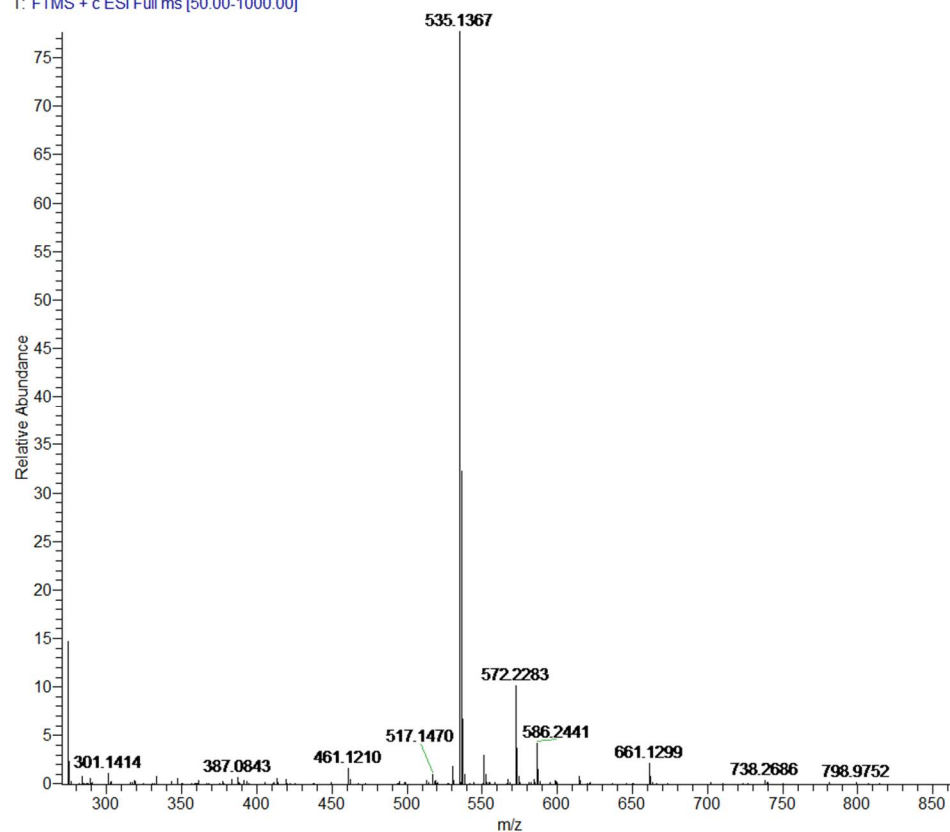

HRMS spectrum of compound Zey-C7

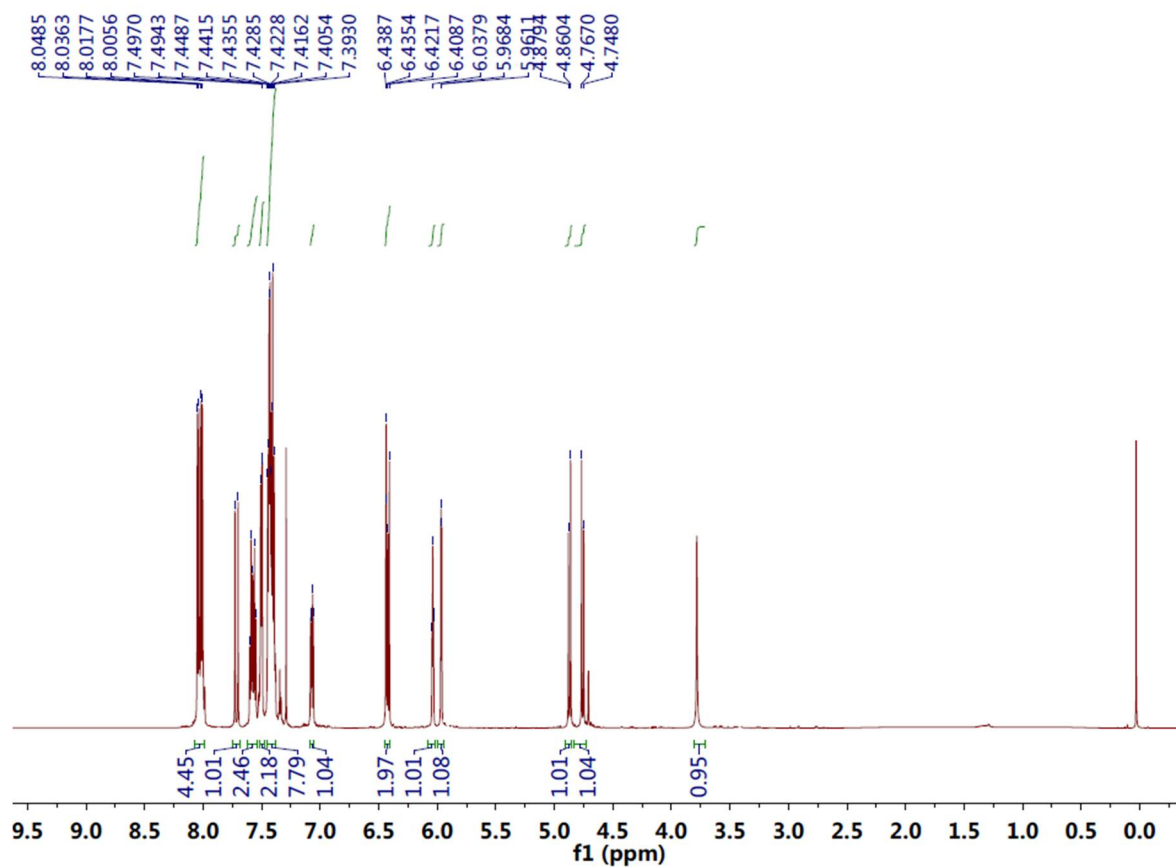

<sup>1</sup>H NMR spectrum of compound Zey-C7

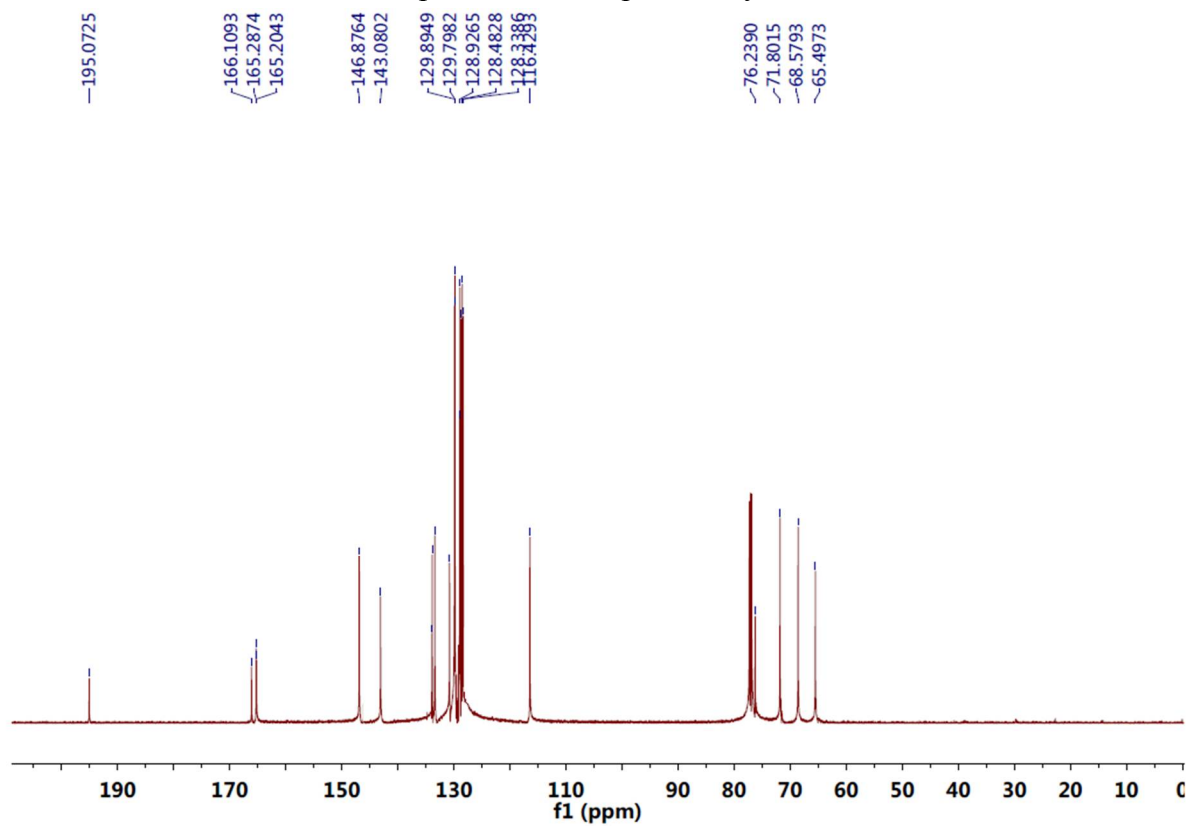

<sup>13</sup>C NMR spectrum of compound Zey-C7

ROUGUI 1 F\_190318103220 #1 RT: 0.00 AV: 1 NL: 1.31E7  
T: FTMS + c ESI Full ms [50.00-1000.00]

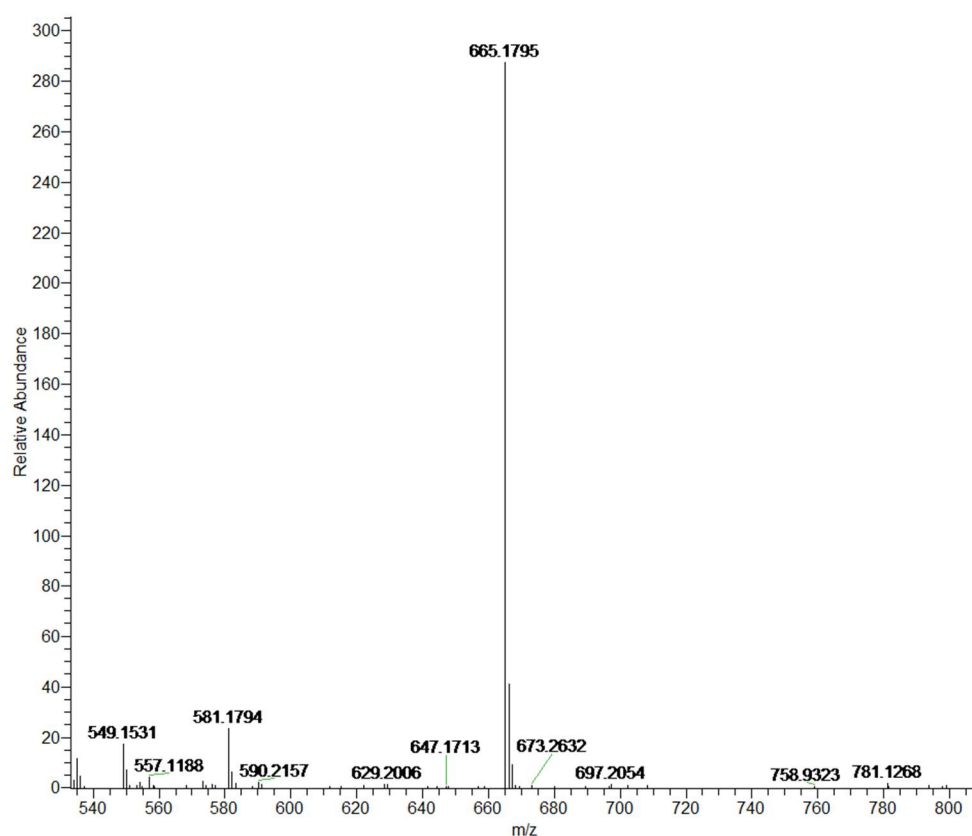

HRMS spectrum of compound Zey-C8

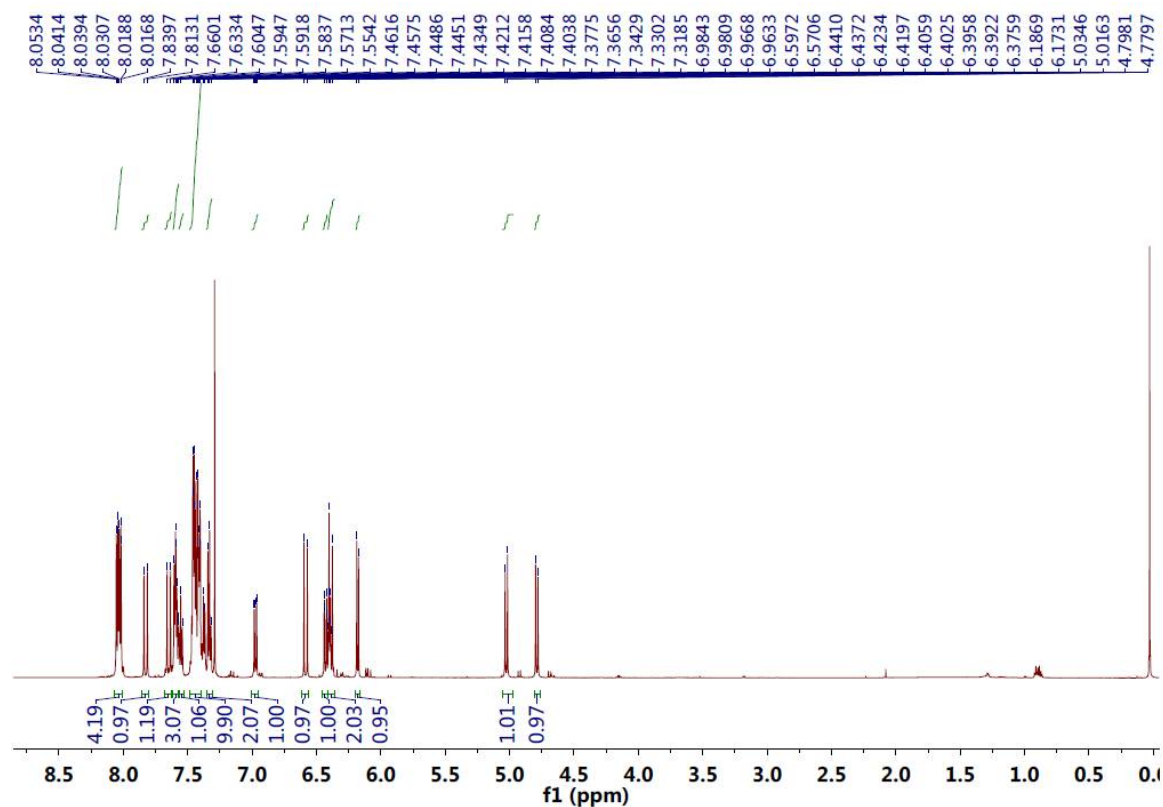

<sup>1</sup>H NMR spectrum of compound Zey-C8

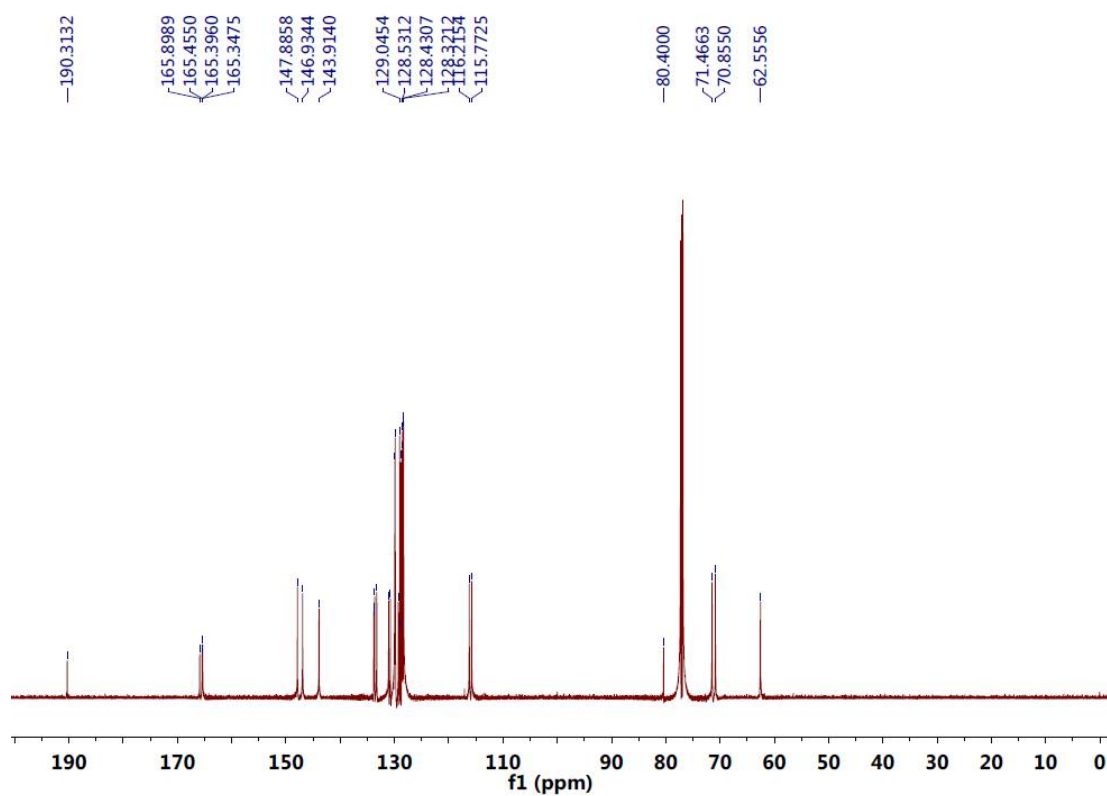

$^{13}\text{C}$ NMR spectrum of compound Zey-C8
